# Supplementary material
Source: PubMed Central journal article supplement (PMC4020522)
Supplement: NIHMS535098-supplement-Webappendix.pdf [file NIHMS535098-supplement-Webappendix.pdf]

Supplementary Materials to:

**Genetic variants associated with colorectal-cancer risk:  
comprehensive research synopsis, meta-analysis, and  
epidemiological evidence**

Xiangyu Ma, Ben Zhang, Wei Zheng

Correspondence to:

Prof Wei Zheng  
Vanderbilt Epidemiology Center  
Vanderbilt University School of Medicine  
2525 West End Avenue, 8th Floor  
Nashville, TN 37203-1738, USA  
Phone: (615) 936-0682  
Fax: (615) 936-8241  
E-mail: [wei.zheng@vanderbilt.edu](mailto:wei.zheng@vanderbilt.edu)

## **Contents**

### **Webappendix notes for Venice criteria**

**Webappendix Table 1** Associations of 267 genetic variants with colorectal-cancer risk in meta-analyses using different genetic models

**Webappendix table 2** Included studies for the genomic variants showing a statistically significant association with colorectal cancer risk from meta-analyses, based on all available data or ethnicity specific data

**Webappendix Table 3** Detailed information for genetic variants nominally significantly associated with colorectal-cancer risk in meta-analyses of all available data or ethnicity-specific data

**Webappendix Table 4** Detailed information for additional genetic variants nominally significantly associated with colorectal-cancer risk in meta-analyses using dominant or recessive models

**Webappendix Table 5** Meta-analysis of associations between 267 genetic variants and colorectal-cancer risk by ethnicity

**Webappendix Table 6** Results of previously published meta-analysis compared to meta-analyses performed in this study

**References used in Webappendix table 2**

**References used in Webappendix table 6**

## **Webappendix notes for Venice criteria**

### **Amount of evidence**

A: Large-scale evidence — minor genetic group (alleles or genotypes) in cases and controls >1,000.

B: Moderate amount of evidence — minor genetic group in cases and controls between 100 and 1,000.

C: Little evidence — minor genetic group in cases and controls <100.

### **Replication of association**

A: Little between-study heterogeneity —  $I^2 < 25\%$ .

B: Moderate between-study heterogeneity —  $I^2$  between 25% and 50%.

C: Large between-study heterogeneity —  $I^2 > 50\%$ .

### **Protection from bias**

A: No observable bias and bias was unlikely to explain the presence of the association.

B: No obvious bias may affect the presence of the association, but there is considerable missing information on the identification of evidence.

C: Bias is demonstrable or is likely to explain the presence of the association.

### **General checks for bias**

1) Association lost with exclusion of first study;

- 2) Association lost with exclusion of studies deviated from HWE;
- 3) Small magnitude of association (i.e.,  $0.87 < OR < 1.15$ );
- 4) Evidence of small-study effect ( $p < 0.10$  in modified Egger test);
- 5) Evidence is presented for an excess of individual studies with significant findings ( $p < 0.10$  in significant bias test).

Appendix Table 1. Associations of 267 genetic variants with colorectal-cancer risk in meta-analysis using different genetic models

| Genes                | Variant ID | Genetic variants                                   | Category       | Comparison               | Ethnicity | Number evaluated Studies | Colorectal-cancer risk meta-analysis |          |               |                  |                             |                    |    |                |                         |                       | Dominant model   |                             | Recessive model    |                  |                             |                    |    |
|----------------------|------------|----------------------------------------------------|----------------|--------------------------|-----------|--------------------------|--------------------------------------|----------|---------------|------------------|-----------------------------|--------------------|----|----------------|-------------------------|-----------------------|------------------|-----------------------------|--------------------|------------------|-----------------------------|--------------------|----|
|                      |            |                                                    |                |                          |           |                          | Cases                                | Controls | Frequency (%) | OR (95% CI)      | P value                     | I <sup>2</sup> (%) | Q  | P <sup>a</sup> | Modified P <sup>a</sup> | Excess P <sup>a</sup> | OR (95% CI)      | P value                     | I <sup>2</sup> (%) | OR (95% CI)      | P value                     | I <sup>2</sup> (%) |    |
| <i>ACB1</i>          | 1          | rs1128503 (Gln412Gly)                              | intron         | T vs C                   | All       | 3                        | 195                                  | 324      | 42.59         | 0.83 (0.52-1.33) | 0.434                       | 68                 | 6  | 0.05           | 0.82                    | 0.27                  | 1.1 (0.97-1.24)  | 0.134                       | 60                 | 1.04 (0.93-1.14) | 0.421                       | 0                  |    |
| <i>ACB1</i>          | 2          | rs1202168                                          | synonymous     | T vs C                   | White     | 4                        | 6,318                                | 5,805    | 41.25         | 1.05 (0.97-1.14) | 0.191                       | 55                 | 7  | 0.08           | 0.65                    | 0.13                  | 1.1 (0.97-1.24)  | 0.134                       | 60                 | 1.04 (0.93-1.14) | 0.421                       | 0                  |    |
| <i>ACB1</i>          | 3          | rs2229109 (Ser400Asn)                              | non-synonymous | A vs G                   | White     | 3                        | 4,242                                | 4,178    | 5.19          | 0.99 (0.86-1.13) | 0.869                       | 0                  | 1  | 0.57           | 0.47                    | 1.00                  | 0.99 (0.86-1.14) | 0.892                       | 0                  | 0.92 (0.32-2.67) | 0.876                       | 2                  |    |
| <i>ACB1</i>          | 4          | r868755                                            | intron         | T vs G                   | White     | 3                        | 2,958                                | 3,255    | 42.06         | 1.06 (0.99-1.14) | 0.106                       | 0                  | 2  | 0.39           | 0.28                    | 0.37                  | 1.09 (0.96-1.24) | 0.166                       | 25                 | 1.04 (0.96-1.2)  | 0.573                       | 14                 |    |
| <i>ACB1</i>          | 5          | r9028254 (Asn21Asp)                                | non-synonymous | A vs G                   | White     | 4                        | 5,292                                | 5,234    | 8.89          | 1.01 (0.78-1.08) | 0.400                       | 96                 | 68 | 0.09           | 0.99                    | 0.27                  | 1.00             | 0.99 (0.86-1.14)            | 0.892              | 0                | 0.92 (0.32-2.67)            | 0.876              | 2  |
| <i>ACB1/MDR1</i>     | 6          | rs1045642 (p.Ile1145Ile, c.3435T>C)                | synonymous     | C vs T                   | All       | 13                       | 6,312                                | 7,128    | 47.52         | 0.98 (0.89-1.07) | 0.611                       | 58                 | 27 | 0.00           | 0.83                    | 0.00                  | 1.00             | 1.00 (0.88-1.13)            | 0.984              | 46               | 0.97 (0.83-1.14)            | 0.721              | 61 |
| <i>ACB1/MDR1</i>     | 7          | rs2032582 (2677G>T)                                | non-synonymous | T vs G                   | All       | 4                        | 558                                  | 672      | 47.02         | 0.94 (0.78-1.14) | 0.555                       | 22                 | 4  | 0.28           | 0.02                    | 1.00                  | 0.86 (0.64-1.16) | 0.327                       | 25                 | 1.03 (0.74-1.43) | 0.865                       | 23                 |    |
| <i>ACB1</i>          | 8          | 287-bp repeat (LD)                                 | STR            | ins vs del               | White     | 3                        | 509                                  | 6,895    | 47.28         | 1.01 (0.87-1.18) | 0.857                       | 0                  | 1  | 0.76           | 0.11                    | 1.00                  | 1.09 (0.85-1.40) | 0.509                       | 0                  | 1.08 (0.66-1.79) | 0.511                       | 67                 |    |
| <i>ADH1B/ADH2</i>    | 9          | rs1229984 (ADH1B*2; H1S47ARG)                      | non-synonymous | G vs A                   | All       | 6                        | 3,130                                | 4,815    | 21.27         | 1.06 (0.89-1.25) | 0.525                       | 67                 | 15 | 0.01           | 0.44                    | 0.01                  | 1.06 (0.83-1.34) | 0.662                       | 72                 | 1.16 (0.93-1.43) | 0.185                       | 0                  |    |
| <i>ADH1C/ADH3</i>    | 10         | r9698 (p.Ile350Phe, p.Ile350Val)                   | non-synonymous | G vs A                   | All       | 9                        | 4,817                                | 8,019    | 36.21         | 1.02 (0.93-1.15) | 0.569                       | 71                 | 27 | 0.00           | 0.52                    | 0.07                  | 1.00             | 1.00 (0.87-1.16)            | 0.952              | 66               | 1.12 (0.93-1.34)            | 0.254              | 59 |
| <i>ADPOO</i>         | 11         | rs1501299                                          | intron         | G vs C                   | All       | 6                        | 1,743                                | 2,386    | 30.43         | 0.98 (0.88-1.09) | 0.674                       | 18                 | 6  | 0.30           | 0.70                    | 1.00                  | 0.94 (0.80-1.11) | 0.480                       | 37                 | 1.10 (0.87-1.37) | 0.431                       | 5                  |    |
| <i>ADPOO</i>         | 12         | rs2266729 (nearGene-5, C-11374G)                   | intergenic     | G vs C                   | All       | 6                        | 3,889                                | 4,290    | 31.79         | 0.93 (0.84-1.03) | 0.158                       | 52                 | 10 | 0.06           | 0.11                    | 0.57                  | 0.9 (0.78-1.04)  | 0.159                       | 57                 | 0.94 (0.81-1.09) | 0.392                       | 0                  |    |
| <i>ADIPOR1</i>       | 13         | rs1342387                                          | intron         | A vs G                   | All       | 3                        | 1,092                                | 1,295    | 45.91         | 0.9 (0.8-1.01)   | 0.068                       | 0                  | 1  | 0.54           | 0.11                    | 0.00                  | 0.9 (0.75-1.07)  | 0.226                       | 0                  | 0.82 (0.67-1.01) | 0.068                       | 0                  |    |
| <i>ADIPOR1</i>       | 14         | rs7539542                                          | 3' UTR         | C vs G                   | All       | 3                        | 1,098                                | 1,301    | 57.23         | 1.01 (0.84-1.21) | 0.950                       | 53                 | 4  | 0.12           | 0.88                    | 1.00                  | 1.05 (0.85-1.29) | 0.669                       | 0                  | 1.05 (0.85-1.29) | 0.669                       | 0                  |    |
| <i>ALDH2</i>         | 15         | r671 (p.Glu487Leu, p.Glu504Lys, c.1510G>A)         | non-synonymous | A vs G                   | All       | 8                        | 4,359                                | 6,078    | 12.38         | 1.02 (0.82-1.26) | 0.865                       | 70                 | 23 | 0.00           | 0.47                    | 0.00                  | 0.98 (0.77-1.24) | 0.841                       | 64                 | 1.12 (0.69-1.83) | 0.638                       | 67                 |    |
| <i>ALOX12/12-LOX</i> | 16         | rs1266697 (p.Gln61Arg, c.782G>A)                   | non-synonymous | A vs G                   | All       | 7                        | 2,725                                | 4,912    | 44.07         | 1.12 (0.95-1.31) | 0.172                       | 78                 | 27 | 0.00           | 0.39                    | 0.16                  | 1.13 (0.89-1.43) | 0.317                       | 78                 | 1.16 (0.95-1.42) | 0.156                       | 55                 |    |
| <i>ALOX5</i>         | 17         | rs4986832 (nearGene-5, -1708 G>A, c.3400G>A)       | intergenic     | A vs G                   | All       | 3                        | 452                                  | 723      | 14.73         | 0.86 (0.59-1.26) | 0.441                       | 58                 | 5  | 0.09           | 0.28                    | 0.23                  | 0.87 (0.55-1.35) | 0.522                       | 67                 | 0.69 (0.29-1.63) | 0.395                       | 0                  |    |
| <i>APC</i>           | 18         | rs1801155 (I1307K, T3920A)                         | non-synonymous | carriers vs non-carriers | Jewish    | 3                        | 804                                  | 6,188    | 6.80          | 1.96 (1.37-2.79) | <b>1.99e-10<sup>a</sup></b> | 0                  | 0  | 0.84           | 0.64                    | 1.00                  | 1.96 (1.37-2.79) | <b>1.99e-10<sup>a</sup></b> | 0                  | 1.96 (1.37-2.79) | <b>1.99e-10<sup>a</sup></b> | 0                  |    |
| <i>APC</i>           | 19         | rs1801166 (E1317Q)                                 | non-synonymous | (CC>G) vs GG             | All       | 4                        | 3,574                                | 5,223    | 1.10          | 1.69 (0.85-3.35) | 0.134                       | 64                 | 8  | 0.04           | 0.76                    | 1.00                  | 1.69 (0.85-3.35) | 0.134                       | 64                 | 1.69 (0.85-3.35) | 0.134                       | 64                 |    |
| <i>APC</i>           | 20         | rs2229992 (p.Tyr486Tyr)                            | synonymous     | T vs C                   | All       | 3                        | 1,793                                | 1,785    | 39.78         | 0.96 (0.87-1.05) | 0.357                       | 0                  | 2  | 0.46           | 0.48                    | 1.00                  | 0.9 (0.76-1.05)  | 0.182                       | 26                 | 1.02 (0.85-1.22) | 0.918                       | 0                  |    |
| <i>APC</i>           | 21         | rs2229995 (p.Gly250Ser, c.7504G>A)                 | non-synonymous | A vs G                   | White     | 3                        | 1,130                                | 1,626    | 1.75          | 1.25 (0.85-1.85) | 0.258                       | 0                  | 0  | 0.93           | 0.77                    | 1.00                  | 1.26 (0.85-1.87) | 0.250                       | 0                  | 1.01 (0.83-1.23) | 0.818                       | 0                  |    |
| <i>APC</i>           | 22         | rs1411145 (Thr497Thr)                              | synonymous     | C vs T                   | All       | 4                        | 3,644                                | 2,817    | 36.14         | 1.02 (0.92-1.13) | 0.963                       | 13                 | 3  | 0.33           | 0.13                    | 0.00                  | 1.00             | 1.00 (0.84-1.08)            | 0.391              | 0                | 1.01 (0.83-1.23)            | 0.918              | 0  |
| <i>APC</i>           | 23         | rs12427 (p.Gly1678Gly)                             | synonymous     | G vs A                   | All       | 4                        | 2,543                                | 2,790    | 35.63         | 1.01 (0.93-1.09) | 0.879                       | 5                  | 3  | 0.37           | 0.06                    | 1.00                  | 0.95 (0.82-1.11) | 0.529                       | 20                 | 1.01 (0.83-1.24) | 0.909                       | 0                  |    |
| <i>APC</i>           | 24         | rs459552 (p.Val1822Asp, c.5465T>A)                 | non-synonymous | G vs T                   | All       | 8                        | 6,654                                | 7,117    | 22.27         | 0.96 (0.91-1.02) | 0.205                       | 0                  | 5  | 0.66           | 0.19                    | 1.00                  | 0.95 (0.89-1.02) | 0.171                       | 0                  | 0.98 (0.84-1.14) | 0.752                       | 0                  |    |
| <i>APC</i>           | 25         | rs465899 (p.Pro1960Pro)                            | synonymous     | C vs T                   | All       | 3                        | 1,822                                | 2,114    | 45.88         | 1.02 (0.93-1.12) | 0.710                       | 0                  | 2  | 0.39           | 0.78                    | 1.00                  | 1.00 (0.84-1.16) | 0.535                       | 39                 | 0.4 (0.09-1.87)  | 0.242                       | 0                  |    |
| <i>APC</i>           | 26         | rs1048945 (p.Gln518His, c.153G>C)                  | non-synonymous | G vs T                   | White     | 3                        | 3,224                                | 3,369    | 4.05          | 0.89 (0.63-1.25) | 0.407                       | 41                 | 3  | 0.19           | 0.57                    | 1.00                  | 0.90 (0.64-1.26) | 0.535                       | 39                 | 0.4 (0.09-1.87)  | 0.242                       | 0                  |    |
| <i>APC/APEX</i>      | 27         | rs1380156 (p.Asp418Glu, c.444T>G)                  | non-synonymous | G vs T                   | All       | 4                        | 4,475                                | 5,422    | 45.57         | 0.89 (0.80-1.23) | 0.582                       | 80                 | 40 | 0.00           | 0.64                    | 0.02                  | 1.00             | 1.11 (0.88-1.43)            | 0.416              | 82               | 1.00 (0.84-1.24)            | 0.976              | 64 |
| <i>APC</i>           | 28         | rs4301344 (p.Thr1495Ser, c.446G>A)                 | nonsense       | (AA>A) vs GG             | White     | 3                        | 1,367                                | 1,862    | 0.99          | 1.00 (0.60-1.65) | 0.992                       | 0                  | 0  | 0.83           | 0.69                    | 1.00                  | 1.00 (0.60-1.66) | 0.992                       | 0                  | 1.02 (0.85-1.22) | 0.918                       | 0                  |    |
| <i>ARLTS1/ARL11</i>  | 29         | rs3803185 (p.Cys148Arg, T442C, T>C)                | non-synonymous | C vs T                   | White     | 4                        | 2,123                                | 2,681    | 46.10         | 1.07 (0.99-1.17) | 0.093                       | 0                  | 2  | 0.68           | 0.10                    | 1.00                  | 1.11 (0.89-1.37) | 0.352                       | 61                 | 1.09 (0.88-1.34) | 0.453                       | 54                 |    |
| <i>ARLTS1/ARL11</i>  | 30         | rs1801673 (Ex37-62A>T, Asp1853Val)                 | non-synonymous | A vs G                   | White     | 3                        | 2,879                                | 6,384    | 0.66          | 0.77 (0.54-1.10) | 0.144                       | 0                  | 2  | 0.46           | 0.82                    | 1.00                  | 0.79 (0.54-1.14) | 0.211                       | 0                  | 1.02 (0.91-1.15) | 0.184                       | 60                 |    |
| <i>ATM</i>           | 31         | rs2273535 (p.Phe311le, c.91T>A)                    | non-synonymous | A vs G                   | White     | 3                        | 5,374                                | 4,953    | 23.70         | 1.07 (0.94-1.21) | 0.308                       | 60                 | 13 | 0.03           | 0.66                    | 0.51                  | 1.02 (0.93-1.12) | 0.646                       | 11                 | 1.22 (0.91-1.65) | 0.184                       | 60                 |    |
| <i>AURKA/STK15</i>   | 32         | rs2240308 (p.Pro50Ser, c.148C>T, G>A)              | non-synonymous | A vs G                   | White     | 3                        | 3,762                                | 3,934    | 46.11         | 1.07 (0.98-1.17) | 0.124                       | 29                 | 3  | 0.24           | 0.14                    | 1.00                  | 1.09 (0.98-1.20) | 0.099                       | 0                  | 1.10 (0.93-1.31) | 0.263                       | 45                 |    |
| <i>BLM</i>           | 33         | ASH non-carriers/carriers                          | frameshift     | carriers vs non-carriers | All       | 3                        | 1,741                                | 11,043   | 0.84          | 1.89 (0.74-4.83) | 0.184                       | 60                 | 5  | 0.08           | 0.54                    | 0.54                  | 1.89 (0.74-4.83) | 0.184                       | 60                 | 1.06 (0.87-1.29) | 0.562                       | 69                 |    |
| <i>BMP4</i>          | 34         | rs17563 (p.Val152Ala, c.455T>C)                    | non-synonymous | T vs C                   | All       | 4                        | 2,919                                | 3,102    | 63.68         | 1.01 (0.88-1.15) | 0.943                       | 29                 | 4  | 0.23           | 0.84                    | 1.00                  | 1.00 (0.87-1.15) | 0.943                       | 29                 | 1.01 (0.88-1.15) | 0.943                       | 29                 |    |
| <i>CASP8</i>         | 35         | rs3834129 (nearGene-5, -652 del, c. CTACT)         | intergenic     | 6 bp ins vs del          | All       | 10                       | 6,922                                | 10,750   | 41.14         | 1.05 (0.92-1.20) | 0.441                       | 82                 | 50 | 0.00           | 0.48                    | 0.06                  | 1.04 (0.86-1.27) | 0.682                       | 83                 | 1.07 (0.91-1.25) | 0.401                       | 54                 |    |
| <i>CASR</i>          | 36         | rs1042636 (p.Arg990Gly, c.2968A>G)                 | non-synonymous | G vs A                   | White     | 4                        | 6,298                                | 7,839    | 8.52          | 1.00 (0.92-1.09) | 0.936                       | 0                  | 2  | 0.66           | 0.68                    | 1.00                  | 1.00 (0.91-1.09) | 0.944                       | 0                  | 1.11 (0.71-1.74) | 0.631                       | 21                 |    |
| <i>CASR</i>          | 37         | rs1801725 (p.Ala996Ser, c.2956G>T)                 | non-synonymous | T vs G                   | White     | 3                        | 2,733                                | 3,359    | 13.10         | 1.01 (0.99-1.02) | 0.661                       | 84                 | 12 | 0.00           | 0.65                    | 1.00                  | 1.03 (0.96-1.16) | 0.089                       | 82                 | 1.76 (0.86-3.61) | 0.124                       | 69                 |    |
| <i>CAT</i>           | 38         | rs5742805 (Ex275The, C1831278T)                    | non-synonymous | C vs T                   | White     | 4                        | 4,374                                | 4,074    | 7.41          | 0.99 (0.91-1.17) | 0.589                       | 0                  | 0  | 0.60           | 0.60                    | 1.00                  | 1.03 (0.91-1.17) | 0.523                       | 61                 | 1.03 (0.91-1.17) | 0.523                       | 61                 |    |
| <i>CENDD1</i>        | 39         | rs91344 (c60936S, p.Pro241Pro, c.723G>A, c.870G>A) | synonymous     | A vs G                   | All       | 22                       | 6,316                                | 8,272    | 48.15         | 1.05 (0.98-1.13) | 0.197                       | 51                 | 51 | 0.00           | 0.56                    | 0.01                  | 1.13 (1.01-1.26) | <b>0.035</b>                | 43                 | 1.00 (0.86-1.17) | 0.976                       | 48                 |    |
| <i>CDH1</i>          | 40         | rs16260 (UTR-5, -160C>A)                           | 5' UTR         | A vs C                   | All       | 9                        | 7,220                                | 7,045    | 28.09         | 0.94 (0.88-1.01) | 0.116                       | 21                 | 10 | 0.26           | 0.22                    | 0.21                  | 0.97 (0.86-1.09) | 0.575                       | 40                 | 0.88 (0.74-1.04) | 0.129                       | 19                 |    |
| <i>CDKN1A</i>        | 41         | rs1059234 (UTR-3, c.*20C>T)                        | 3' UTR         | T vs C                   | All       | 3                        | 1,036                                | 1,512    | 30.29         | 1.01 (0.87-1.18) | 0.912                       | 4                  | 2  | 0.35           | 0.91                    | 1.00                  | 1.05 (0.81-1.36) | 0.719                       | 29                 | 0.93 (0.69-1.24) | 0.596                       | 0                  |    |
| <i>CDKN1A</i>        | 42         | rs1801270 (p.Ser31Arg, c.93C>A)                    | non-synonymous | A vs C                   | All       | 3                        | 1,037                                | 1,511    | 29.85         | 0.92 (0.69-1.23) | 0.582                       | 55                 | 4  | 0.11           | 0.62                    | 0.21                  | 0.87 (0.57-1.34) | 0.535                       | 68                 | 0.91 (0.68-1.22) | 0.535                       | 0                  |    |
| <i>CH22</i>          | 43         | 110d04C (683X)                                     | frameshift     | carriers vs non-carriers | White     | 7                        | 3,874                                | 11,630   | 0.71          | 1.88 (1.29-2.73) | <b>0.001</b>                | 0                  | 5  | 0.50           | 0.77                    | 1.00                  | 1.88 (1.29-2.73) | <b>0.001</b>                | 0                  | 1.88 (1.29-2.73) | <b>0.001</b>                | 0                  |    |
| <i>CH22</i>          | 44         | rs1787961 (p.Ile400Thr)                            | non-synonymous | carriers vs non-carriers | White     | 6                        | 6,042                                | 17,051   | 6.91          | 1.56 (1.32-1.84) | <b>1.22e-10<sup>a</sup></b> | 0                  | 3  | 0.76           | 0.19                    | 0.19                  |                  |                             |                    |                  |                             |                    |    |

|               |     |                                              |                |                 |       |    |        |        |       |                  |                  |    |     |      |             |                  |                  |                  |                  |                  |                  |     |  |
|---------------|-----|----------------------------------------------|----------------|-----------------|-------|----|--------|--------|-------|------------------|------------------|----|-----|------|-------------|------------------|------------------|------------------|------------------|------------------|------------------|-----|--|
| <i>GSTP1</i>  | 99  | rs1695 (p.Ile105Val, c.313A>G)               | non-synonymous | G vs A          | All   | 33 | 9,986  | 15,562 | 27.54 | 0.98 (0.93-1.03) | 0.487            | 25 | 43  | 0.10 | 0.50        | 0.27             | 0.99 (0.93-1.07) | 0.868            | 29               | 0.95 (0.86-1.06) | 0.361            | 12  |  |
| <i>GSTZ1</i>  | 100 | Present/Null                                 | phenotype      | null vs present | All   | 43 | 15,144 | 23,847 | 29.53 | 1.15 (1.07-1.27) | <b>0.004</b>     | 68 | 131 | 0.00 | 0.28        | <b>0.03</b>      |                  |                  |                  |                  |                  |     |  |
| <i>GSTZ2</i>  | 101 | rs117427 (GLU32LYS)                          | non-synonymous | A vs G          | All   | 3  | 2,860  | 3,271  | 29.27 | 0.93 (0.73-1.19) | 0.569            | 57 | 5   | 0.10 | 0.16        | 1.00             | 0.93 (0.69-1.25) | 0.624            | 61               | 1.02 (0.86-1.22) | 0.826            | 0   |  |
| <i>HFE</i>    | 102 | rs179902 (C>D)                               | non-synonymous | G vs A          | White | 7  | 4,079  | 4,079  | 14.70 | 1.03 (0.93-1.14) | 0.572            | 7  | 7   | 0.37 | 0.42        | 1.00             | 1.07 (0.78-1.51) | 0.608            | 0                | 1.18 (0.73-1.92) | 0.494            | 30  |  |
| <i>HFE</i>    | 103 | rs1800562 (rs1155158, p.CvS282Tv, c.1005G>A) | non-synonymous | A vs G          | White | 10 | 2,502  | 30,857 | 7.43  | 1.05 (0.92-1.21) | 0.467            | 0  | 3   | 0.94 | <b>0.06</b> | 1.00             | 1.04 (0.94-1.2)  | 0.622            | 0                | 1.22 (0.52-2.87) | 0.648            | 32  |  |
| <i>HFE</i>    | 104 | rs1549465 (p.ProS82Ser, c.1744C>T)           | non-synonymous | T vs C          | All   | 3  | 3,019  | 4,950  | 8.43  | 1.04 (0.74-1.46) | 0.841            | 69 | 7   | 0.04 | <b>0.52</b> | 0.13             | 1.01 (0.69-1.50) | 0.944            | 73               |                  |                  |     |  |
| <i>HPGD</i>   | 105 | rs2612656                                    | intron         | G vs A          | White | 3  | 2,979  | 5,575  | 22.75 | 1.09 (0.97-1.24) | 0.162            | 65 | 6   | 0.06 | 0.57        | 1.00             | 1.08 (0.93-1.25) | 0.294            | 62               | 1.31 (1.05-1.64) | <b>0.016</b>     | 21  |  |
| <i>HPGD</i>   | 106 | rs7349744                                    | intron         | A vs G          | White | 3  | 3,014  | 5,622  | 30.54 | 1.00 (0.93-1.07) | 0.897            | 0  | 2   | 0.44 | 0.40        | 1.00             | 0.96 (0.87-1.04) | 0.308            | 0                | 1.13 (0.91-1.41) | 0.258            | 51  |  |
| <i>HPGD</i>   | 107 | rs7349744                                    | intron         | C vs A          | White | 3  | 3,001  | 5,624  | 31.06 | 0.96 (0.84-1.09) | 0.516            | 66 | 6   | 0.84 | 1.00        | 0.96 (0.78-1.13) | 0.554            | 38               | 0.96 (0.73-1.26) | 0.944            | 68               |     |  |
| <i>HPGD</i>   | 108 | rs8752                                       | 3' UTR         | G vs A          | White | 3  | 3,008  | 5,632  | 41.98 | 1.01 (0.86-1.17) | 0.936            | 22 | 11  | 0.44 | <b>0.09</b> | 0.43             | 0.96 (0.75-1.24) | 0.749            | 85               | 1.09 (0.96-1.24) | 0.201            | 23  |  |
| <i>HPGD</i>   | 109 | rs9312555                                    | 3' UTR         | G vs A          | White | 3  | 3,015  | 5,634  | 15.42 | 0.93 (0.86-1.02) | 0.134            | 0  | 2   | 0.44 | <b>0.06</b> | 1.00             | 0.92 (0.83-1.01) | 0.091            | 0                | 1.00 (0.74-1.36) | 0.992            | 0   |  |
| <i>ICAM1</i>  | 110 | rs498 (p.Lys469Glu, c.1405A>G)               | non-synonymous | G vs A          | All   | 4  | 3,229  | 3,357  | 42.63 | 0.96 (0.79-1.17) | 0.719            | 70 | 10  | 0.02 | 0.90        | <b>0.02</b>      | 0.91 (0.72-1.16) | 0.441            | 58               | 1.02 (0.80-1.31) | 0.873            | 43  |  |
| <i>IGF1</i>   | 111 | (CA)n (R19>nonR19)                           | STR            | non R19 vs R19  | All   | 8  | 5,493  | 6,827  | 36.71 | 0.99 (0.89-1.09) | 0.769            | 70 | 23  | 0.00 | 0.36        | 0.03             | 0.92 (0.73-1.16) | 0.491            | 88               | 1.03 (0.92-1.15) | 0.611            | 20  |  |
| <i>IGF1</i>   | 112 | rs35767                                      | intergenic     | T vs C          | All   | 3  | 2,717  | 4,880  | 24.75 | 0.95 (0.84-1.14) | 0.599            | 59 | 5   | 0.09 | 0.15        | 0.25             | 0.98 (0.79-1.21) | 0.826            | 60               | 0.75 (0.62-0.91) | <b>0.003</b>     | 0   |  |
| <i>IGFBP1</i> | 113 | rs4619 (p.Ile233Met, c.759A>G)               | non-synonymous | G vs A          | White | 3  | 3,570  | 3,660  | 35.63 | 1.02 (0.75-1.16) | 0.535            | 85 | 13  | 0.00 | 0.63        | 0.48             | 0.89 (0.65-1.26) | 0.509            | 89               | 1.02 (0.89-1.17) | 0.787            | 0   |  |
| <i>IGFBP1</i> | 114 | rs2854744 (nearGene5, c.202A, A>C)           | intergenic     | C vs A          | All   | 9  | 6,872  | 10,606 | 46.30 | 1.03 (0.98-1.07) | 0.284            | 0  | 2   | 0.98 | <b>0.13</b> | 1.00             | 1.0 (0.93-1.07)  | 0.985            | 0                | 1.07 (0.94-1.15) | 0.078            | 0   |  |
| <i>IGFBP3</i> | 115 | rs2854746 (p.Ala32Gly, c.95C>G)              | non-synonymous | G vs C          | All   | 5  | 4,282  | 7,365  | 46.08 | 1.07 (1.01-1.14) | 0.016            | 0  | 2   | 0.07 | 0.68        | 1.00             | 1.12 (1.03-1.22) | <b>0.012</b>     | 0                | 1.05 (0.95-1.17) | 0.327            | 15  |  |
| <i>IL10</i>   | 116 | rs1800872 (nearGene5, c.4433A>C, -592C>A)    | intergenic     | A vs C          | White | 5  | 1,561  | 2,439  | 22.57 | 0.94 (0.81-1.1)  | 0.444            | 41 | 8   | 0.13 | 0.83        | 0.28             | 0.9 (0.78-1.05)  | 0.168            | 16               | 1.13 (0.73-1.76) | 0.580            | 45  |  |
| <i>IL10</i>   | 117 | rs1800896 (nearGene5, c.3943A>G, -1082A>G)   | intergenic     | G vs A          | White | 5  | 1,134  | 1,492  | 46.68 | 0.98 (0.84-1.15) | 0.793            | 44 | 7   | 0.13 | 0.70        | 0.15             | 1.00 (0.84-1.24) | 0.976            | 31               | 1.04 (0.76-1.16) | 0.550            | 9   |  |
| <i>IL16</i>   | 118 | rs4072111 (p.Pro44Ser, c.1300C>T)            | non-synonymous | T vs C          | All   | 3  | 3,193  | 3,577  | 12.31 | 1.06 (0.91-1.25) | 0.494            | 43 | 4   | 0.17 | 0.72        | 1.00             | 1.03 (0.87-1.23) | 0.716            | 38               | 1.32 (0.82-1.14) | 0.253            | 26  |  |
| <i>IL16</i>   | 119 | rs1145227 (nearGene5, c.4970C>T, -31T>C)     | intergenic     | C vs T          | All   | 6  | 1,593  | 2,170  | 33.66 | 1.07 (0.97-1.19) | 0.156            | 0  | 1   | 0.97 | 0.03        | 1.00             | 1.11 (0.96-1.27) | 0.152            | 3                | 1.1 (0.83-1.44)  | 0.516            | 43  |  |
| <i>IL18</i>   | 120 | rs16944                                      | intergenic     | G vs A          | White | 3  | 577    | 828    | 36.41 | 0.96 (0.82-1.13) | 0.626            | 0  | 1   | 0.67 | 0.60        | 1.00             | 0.82 (0.55-1.24) | 0.352            | 63               | 1.08 (0.78-1.48) | 0.649            | 0   |  |
| <i>IL4</i>    | 121 | rs2243250 (nearGene5, -509C>T)               | intergenic     | T vs C          | White | 6  | 1,225  | 1,754  | 18.93 | 0.92 (0.76-1.12) | 0.401            | 42 | 9   | 0.12 | 0.48        | 0.30             | 0.91 (0.74-1.13) | 0.401            | 35               | 0.88 (0.6-1.27)  | 0.484            | 0   |  |
| <i>IL4R</i>   | 122 | rs1801275 (p.Gln576Arg, c.1727A>G)           | non-synonymous | G vs A          | All   | 4  | 803    | 986    | 18.97 | 1.05 (0.88-1.24) | 0.624            | 0  | 1   | 0.69 | 0.49        | 1.00             | 1.03 (0.84-1.27) | 0.757            | 0                | 1.18 (0.71-1.95) | 0.522            | 0   |  |
| <i>IL4R</i>   | 123 | rs1805012 (C43I)                             | non-synonymous | G vs A          | White | 3  | 2,840  | 3,233  | 11.18 | 0.95 (0.70-1.14) | 0.764            | 59 | 5   | 0.09 | 0.25        | 0.16             | 0.93 (0.66-1.32) | 0.697            | 60               | 1.32 (0.82-1.11) | 0.290            | 0   |  |
| <i>IL4R</i>   | 124 | rs1805012 (S503P)                            | non-synonymous | C vs T          | White | 3  | 802    | 802    | 36.25 | 0.92 (0.84-1.01) | 0.834            | 0  | 1   | 0.61 | 0.47        | 1.00             | 0.91 (0.73-1.13) | 0.554            | 0                | 1.13 (0.83-1.51) | 0.129            | 0   |  |
| <i>IL6</i>    | 125 | rs1800795                                    | intergenic     | C vs G          | All   | 14 | 6,952  | 8,657  | 38.55 | 1.01 (0.93-1.11) | 0.749            | 65 | 38  | 0.00 | 0.50        | 0.00             | 1.02 (0.91-1.14) | 0.733            | 59               | 1 (0.89-1.13)    | 0.963            | 34  |  |
| <i>IL6</i>    | 126 | rs1800797                                    | intergenic     | (AA>A>G) vs GG  | White | 4  | 2,612  | 3,381  | 60.75 | 0.96 (0.87-1.07) | 0.468            | 0  | 2   | 0.57 | 0.61        | 1.00             | 0.96 (0.87-1.07) | 0.468            | 0                |                  |                  |     |  |
| <i>IL8R</i>   | 127 | rs2228145 (rs192284, Asp358Val)              | non-synonymous | C vs A          | White | 3  | 3,070  | 20,173 | 30.92 | 0.97 (0.91-1.04) | 0.435            | 0  | 2   | 0.47 | 0.08        | 1.00             | 1.02 (0.87-1.20) | 0.795            | 36               | 1.04 (0.82-1.07) | 0.363            | 0   |  |
| <i>IL8</i>    | 128 | rs4073 (nearGene5, T-251A)                   | intergenic     | A vs T          | White | 10 | 3,520  | 4,381  | 45.88 | 1.04 (0.92-1.18) | 0.525            | 70 | 30  | 0.00 | 0.52        | 0.09             | 1.05 (0.87-1.28) | 0.620            | 71               | 0.94 (0.87-1.23) | 0.638            | 55  |  |
| <i>IRS1</i>   | 129 | rs1801278 (p.Gly971Arg, c.2911G>A)           | non-synonymous | A vs G          | White | 7  | 7,048  | 7,533  | 6.92  | 1.08 (0.96-1.22) | 0.219            | 39 | 10  | 0.13 | 0.99        | 0.45             | 1.15 (0.95-1.39) | 0.674            | 74               | 1.05 (0.66-1.68) | 0.834            | 0   |  |
| <i>IRS2</i>   | 130 | rs1805997 (p.Gly1057Arg, c.3170G>A)          | non-synonymous | A vs G          | White | 7  | 7,048  | 7,533  | 41.13 | 0.97 (0.86-1.08) | 0.156            | 0  | 2   | 0.47 | 0.03        | 1.00             | 0.93 (0.67-1.22) | 0.525            | 29               | 1.02 (0.87-1.13) | 0.920            | 0   |  |
| <i>LCT</i>    | 131 | rs4098235 (c.1917-326C>T, 1910 C>T)          | intron         | T vs C          | White | 7  | 2,103  | 2,492  | 41.75 | 0.99 (0.87-1.14) | 0.879            | 51 | 12  | 0.06 | <b>0.02</b> | 0.94             | 0.79 (0.71-1.03) | 0.438            | 30               | 1.02 (0.78-1.33) | 0.886            | 50  |  |
| <i>LEP</i>    | 132 | rs7799039                                    | intergenic     | A vs G          | White | 3  | 2,324  | 2,776  | 43.98 | 0.95 (0.88-1.03) | 0.222            | 0  | 2   | 0.46 | 0.85        | 1.00             | 0.98 (0.87-1.10) | 0.704            | 0                | 0.89 (0.77-1.02) | 0.478            | 0   |  |
| <i>LEPR</i>   | 133 | rs1137101 (p.Gln223Arg, c.668A>G)            | non-synonymous | G vs A          | White | 3  | 1,100  | 1,166  | 44.47 | 1.08 (0.96-1.22) | 0.187            | 0  | 1   | 0.69 | <b>0.09</b> | 1.00             | 1.14 (0.92-1.40) | 0.226            | 16               | 1.09 (0.91-1.34) | 0.384            | 0   |  |
| <i>LIPC</i>   | 134 | rs6083 (N215S)                               | non-synonymous | A vs G          | All   | 3  | 4,702  | 4,914  | 36.52 | 0.93 (0.86-1.01) | 0.075            | 31 | 3   | 0.24 | 0.93        | 1.00             | 0.95 (0.87-1.03) | 0.192            | 0                | 0.85 (0.74-0.99) | 0.032            | 25  |  |
| <i>MBL1</i>   | 135 | rs1001265                                    | intergenic     | G vs C          | All   | 3  | 822    | 872    | 32.17 | 0.91 (0.74-1.17) | 0.465            | 33 | 4   | 0.12 | 0.74        | 1.00             | 0.93 (0.75-1.13) | 0.468            | 0                |                  |                  |     |  |
| <i>MBL2</i>   | 136 | rs1800450 (Gly54Asp)                         | non-synonymous | A vs G          | All   | 4  | 3,395  | 3,546  | 13.85 | 0.97 (0.86-1.08) | 0.775            | 42 | 5   | 0.16 | 0.03        | 1.00             | 0.83 (0.54-1.27) | 0.381            | 61               | 0.89 (0.77-1.02) | 0.478            | 0   |  |
| <i>MBL2</i>   | 137 | rs1800451 (p.Gly57Glu)                       | non-synonymous | A vs G          | All   | 3  | 819    | 843    | 6.17  | 1.31 (0.93-1.83) | 0.120            | 0  | 2   | 0.43 | 0.48        | 1.00             |                  |                  |                  |                  |                  |     |  |
| <i>MBL2</i>   | 138 | rs5030737 (RS2C)                             | non-synonymous | T vs C          | All   | 4  | 1,185  | 1,199  | 6.21  | 1.03 (0.81-1.3)  | 0.805            | 0  | 1   | 0.81 | 0.40        | 1.00             | 1.13 (0.82-1.57) | 0.453            | 0                |                  |                  |     |  |
| <i>MBL2</i>   | 139 | rs7096206                                    | intergenic     | C vs G          | All   | 3  | 826    | 873    | 19.82 | 0.98 (0.82-1.17) | 0.795            | 0  | 0   | 0.81 | 0.34        | 1.00             |                  |                  |                  |                  |                  |     |  |
| <i>MDM2</i>   | 140 | rs2279744 (nearGene5, SNP209, c.14+309T>G)   | intergenic     | G vs T          | All   | 10 | 3,032  | 2,538  | 42.99 | 1.12 (0.94-1.34) | 0.211            | 76 | 39  | 0.00 | 0.54        | 1.00             | 1.24 (0.92-1.67) | 0.154            | 80               | 1.06 (0.86-1.29) | 0.607            | 39  |  |
| <i>MDM2</i>   | 141 | rs1291723 (Leu115Phe, c.342C>T)              | intergenic     | T vs C          | All   | 13 | 2,284  | 2,284  | 12.99 | 1.02 (0.91-1.14) | 0.992            | 13 | 13  | 0.00 | 0.92        | 0.31             | 1.03 (0.87-1.21) | 0.609            | 0                | 1.11 (0.83-1.49) | 0.516            | 0   |  |
| <i>MGAT1</i>  | 142 | rs2308321 (p.Ile174Val, c.520A>G)            | non-synonymous | G vs C          | All   | 6  | 3,843  | 8,783  | 12.79 | 1.00 (0.80-1.25) | 0.984            | 74 | 19  | 0.00 | 0.70        | <b>0.01</b>      | 1.00 (0.79-1.26) | 0.976            | 71               | 1.10 (0.61-1.99) | 0.757            | 35  |  |
| <i>MLH1</i>   | 143 | rs121912963 (p.Leu132H, c.415G>C)            | non-synonymous | C vs G          | All   | 3  | 1,412  | 1,508  | 0.43  | 2.74 (1.31-5.75) | <b>0.008</b>     | 15 | 2   | 0.31 | 0.75        | 1.00             | 2.78 (1.34-5.74) | <b>0.006</b>     | 12               |                  |                  |     |  |
| <i>MLH1</i>   | 144 | rs1799977 (p.Tic219Val, c.655A>G)            | non-synonymous | G vs A          | All   | 10 | 6,384  | 8,972  | 29.56 | 1.01 (0.92-1.11) | 0.904            | 58 | 21  | 0.01 | 0.66        | 0.26             | 1.03 (0.92-1.16) | 0.589            | 55               | 0.95 (0.81-1.11) | 0.590            | 29  |  |
| <i>MLH1</i>   | 145 | rs1800734 (nearGene5, UTR5, -93G>A)-MSI+ CRC | 5' UTR         | A vs G          | White | 5  | 801    | 10,890 | 21.11 | 1.51 (1.34-1.69) | <b>6.74e-107</b> | 46 | 7   | 0.11 | <b>0.02</b> | 1.00             | 1.46 (1.27-1.69) | <b>2.75e-107</b> | 40               | 2.45 (1.93-3.12) | <b>6.97e-103</b> | 0   |  |
| <i>MLH1</i>   | 146 | rs1800734 (nearGene5, UTR5, -93G>A)          | 5' UTR         | A vs G          | White | 7  | 1,793  | 13,777 | 21.31 | 1.05 (1.01-1.09) | 0.010            | 44 | 0   | 0.00 | 1.00        | 1.00 (1.01-1.11) | 0.014            | 0                | 1.06 (0.95-1.18) | 0.290            | 0                |     |  |
| <i>MLH1</i>   | 147 | rs62750447 (p.Val384Asp, 1151 A>A)           | non-synonymous | A vs A          | Asian | 3  | 937    | 919    | 1.96  | 2.14 (1.12-4.12) | <b>0.022</b>     | 41 | 3   | 0.18 | <b>0.04</b> | 1.00             | 2.17 (1.04-4.12) | <b>0.019</b>     | 38               |                  |                  |     |  |
| <i>MLH1</i>   | 148 | rs9876116 (Intron 14, c.1668-19A>G)          | intron         | G vs A          | White | 3  | 2,024  | 2,143  | 44.47 | 0.93 (0.85-1.02) | 0.631            | 15 | 2   | 0.31 | 0.56        | 1.00             | 0.96 (0.84-1.09) | 0.516            | 0                | 0.86 (0.70-1.02) | 0.077            | 26  |  |
| <i>MMP1</i>   | 149 | rs1799750 (nearGene5, -1607 1G2G)            | intergenic     | 2G vs 1G        | All   | 8  | 1,477  | 1,751  | 39.63 | 0.76 (0.64-0.92) | <b>0.004</b>     | 61 | 18  | 0.01 | 0.09        | 0.15             | 0.70 (0.54-0.89) | <b>0.004</b>     | 60               | 0.80 (0.64-0.99) | <b>0.041</b>     | 8</ |  |

|                       |     |                                                |                  |                  |       |    |        |         |       |                  |                  |    |     |             |             |             |                  |                  |       |                  |                  |       |    |
|-----------------------|-----|------------------------------------------------|------------------|------------------|-------|----|--------|---------|-------|------------------|------------------|----|-----|-------------|-------------|-------------|------------------|------------------|-------|------------------|------------------|-------|----|
| <i>PTGS2/COX2</i>     | 200 | rs689466 (nearGene-5, g.3813939T>C)            | intergenic       | G vs A           | All   | 9  | 4,076  | 7,610   | 30.34 | 0.88 (0.80-0.98) | <b>0.018</b>     | 56 | 18  | <b>0.02</b> | 0.23        | 1.00        | 0.85 (0.74-0.97) | <b>0.014</b>     | 58    | 0.86 (0.71-1.05) | 0.140            | 30    |    |
| <i>RAD18</i>          | 201 | rs737572 (p.Arg302Gln, c.905G>A)               | non-synonymous   | C vs T           | All   | 3  | 3,174  | 3,397   | 29.22 | 1.19 (1.14-1.3)  | 0.055            | 67 | 6   | 0.05        | 0.19        | 1.00        | 1.18 (1.01-1.37) | 0.033            | 27    | 1.27 (0.87-1.86) | 0.221            | 72    |    |
| <i>RAD51</i>          | 202 | rs1801320 (135G>C)                             | 5' UTR           | C vs G           | White | 4  | 753    | 720     | 32.15 | 1.01 (0.31-3.27) | 0.987            | 97 | 109 | 0.00        | 0.18        | 0.01        | 0.89 (0.43-1.88) | 0.768            | 89    | 1.27 (0.1-16.43) | 0.854            | 95    |    |
| <i>RNASASEL</i>       | 203 | rs486907 (p.Arg462Gln, c.1385G>A)              | non-synonymous   | A vs G           | White | 3  | 808    | 1,132   | 35.03 | 1.05 (0.92-1.2)  | 0.469            | 0  | 1   | 0.61        | 0.21        | 1.00        | 1.03 (0.85-1.24) | 0.789            | 0     | 1.22 (0.8-1.87)  | 0.353            | 55    |    |
| <i>SCD</i>            | 204 | rs7849                                         | 3' UTR           | G vs A           | All   | 3  | 2,011  | 2,580   | 18.49 | 0.85 (0.73-0.98) | 0.025            | 29 | 3   | 0.25        | 0.11        | 1.00        | 0.85 (0.72-1.02) | 0.084            | 33    | 0.64 (0.4-1.02)  | 0.058            | 41    |    |
| <i>SEI1</i>           | 205 | rs34713741                                     | intergenic       | T vs C           | All   | 3  | 1,442  | 2,071   | 33.22 | 1.13 (0.96-1.33) | 0.139            | 60 | 5   | 0.08        | 0.66        | 0.17        | 1.21 (1.05-1.39) | <b>0.008</b>     | 0     | 1.07 (0.63-1.83) | 0.795            | 80    |    |
| <i>SEI2</i>           | 206 | rs5859                                         | 3' UTR           | T vs C           | All   | 3  | 1,409  | 2,086   | 7.48  | 1.04 (0.87-1.23) | 0.689            | 0  | 0   | 0.80        | 0.39        | 1.00        | 1.03 (0.84-1.26) | 0.779            | 0     |                  |                  |       |    |
| <i>SEPP1</i>          | 207 | rs3877899 (Ala264Thr)                          | non-synonymous   | T vs C           | All   | 3  | 1,441  | 2,079   | 7.07  | 1.12 (0.94-1.33) | 0.211            | 0  | 1   | 0.52        | 0.30        | 1.00        | 1.19 (0.96-1.48) | 0.105            | 0     |                  |                  |       |    |
| <i>SERP1</i>          | 208 | rs7579                                         | 3' UTR           | T vs C           | All   | 3  | 1,346  | 1,967   | 69.08 | 1.03 (0.86-1.22) | 0.779            | 60 | 5   | 0.08        | 0.82        | 0.02        | 1.00             | 1.04 (0.86-1.26) | 0.660 | 42               | 1.06 (0.72-1.58) | 0.757 | 57 |
| <i>SERPINE1/PAI-1</i> | 209 | rs1799889 (nearGene-5, -675 4G>5G)             | intergenic       | SG vs 4G         | White | 4  | 2,241  | 4,534   | 44.94 | 0.97 (0.90-1.04) | 0.368            | 0  | 1   | 0.73        | 0.58        | 1.00        | 0.87 (0.78-0.97) | <b>0.014</b>     | 0     | 1.09 (0.96-1.23) | 0.208            | 0     |    |
| <i>SHBG</i>           | 210 | rs6259 (D356N)                                 | non-synonymous   | A vs G           | White | 3  | 4,727  | 4,823   | 11.60 | 1.04 (0.95-1.14) | 0.383            | 0  | 1   | 0.71        | 0.22        | 1.00        | 1.03 (0.94-1.14) | 0.509            | 0     | 1.22 (0.85-1.75) | 0.278            | 0     |    |
| <i>SHMT1</i>          | 211 | rs1979276 (UTR-3, C1420T)                      | 3' UTR           | T vs C           | All   | 5  | 1,697  | 1,994   | 31.97 | 0.93 (0.82-1.05) | 0.215            | 30 | 6   | 0.22        | 0.13        | 0.37        | 0.94 (0.83-1.08) | 0.379            | 0     | 0.84 (0.60-1.18) | 0.322            | 57    |    |
| <i>SLC19A1/RFC1</i>   | 212 | rs1051266 (p.His27Arg, c.80A>G, 80G>A)         | non-synonymous   | A vs G           | White | 3  | 3,775  | 5,340   | 43.66 | 1.02 (0.91-1.14) | 0.757            | 61 | 10  | 0.04        | 0.94        | 0.18        | 1.05 (0.88-1.24) | 0.603            | 63    | 1.00 (0.88-1.13) | 0.968            | 18    |    |
| <i>SLC22A4/OCTN1</i>  | 213 | rs1050152 (L503P)                              | non-synonymous   | T vs C           | White | 3  | 3,110  | 3,243   | 53.39 | 1.06 (0.94-1.21) | 0.342            | 38 | 3   | 0.20        | 0.29        | 1.00        | 1.12 (0.94-1.34) | 0.194            | 29    | 1.02 (0.84-1.23) | 0.849            | 21    |    |
| <i>SOD2</i>           | 214 | rs46880 (rs1799725, Ala16Val)                  | non-synonymous   | T vs C           | All   | 5  | 2,400  | 3,003   | 69.08 | 0.97 (0.89-1.06) | 0.478            | 0  | 0   | 1.00        | 0.92        | 1.00        | 0.99 (0.85-1.16) | 0.928            | 0     | 0.94 (0.82-1.07) | 0.332            | 0     |    |
| <i>SULT1A1</i>        | 215 | rs9282861 (p.Arg213His, c.638G>A)              | non-synonymous   | A vs G           | All   | 11 | 3,802  | 5,042   | 33.40 | 1.02 (0.92-1.12) | 0.757            | 51 | 20  | 0.03        | 0.78        | <b>0.04</b> | 1.02 (0.93-1.11) | 0.726            | 0     | 1.09 (0.75-1.32) | 0.960            | 74    |    |
| <i>SULT1A2</i>        | 216 | rs1059491 (p.Asn235Thr, c.714A>C)              | non-synonymous   | C vs A           | White | 3  | 1,806  | 1,986   | 31.80 | 1.05 (0.95-1.17) | 0.308            | 6  | 2   | 0.35        | 0.21        | 1.00        | 1.08 (0.95-1.23) | 0.219            | 0     | 1.03 (0.82-1.30) | 0.779            | 15    |    |
| <i>TCF7L2</i>         | 217 | rs7903146                                      | intron           | T vs C           | All   | 4  | 3,899  | 20,299  | 26.32 | 1.07 (0.94-1.22) | 0.293            | 66 | 9   | 0.03        | 0.20        | 1.00        | 1.07 (0.91-1.27) | 0.393            | 68    | 1.08 (0.92-1.27) | 0.324            | 5     |    |
| <i>TNC2</i>           | 218 | rs1801198 (p.Arr259Pro, c.776C>G)              | non-synonymous   | G vs C           | White | 3  | 2,582  | 5,117   | 43.70 | 0.96 (0.86-1.07) | 0.453            | 54 | 4   | 0.11        | 0.59        | 1.00        | 0.95 (0.85-1.06) | 0.322            | 13    | 0.97 (0.81-1.15) | 0.697            | 46    |    |
| <i>TERF</i>           | 219 | rs2736100                                      | intron           | T vs C           | White | 8  | 16,176 | 181,135 | 49.34 | 1.07 (1.04-1.1)  | <b>2.92e-10*</b> | 0  | 6   | 0.53        | 0.30        | 0.44        | 1.14 (1.08-1.2)  | <b>2.05e-10*</b> | 0     | 1.06 (1-1.13)    | 0.069            | 15    |    |
| <i>TGFB1</i>          | 220 | rs1800469 (nearGene-5, C.509T)                 | intergenic       | T vs C           | All   | 10 | 4,405  | 5,283   | 38.74 | 0.88 (0.79-0.97) | <b>0.015</b>     | 55 | 20  | 0.02        | 0.97        | 0.71        | 0.83 (0.71-0.97) | <b>0.018</b>     | 58    | 0.83 (0.73-0.95) | <b>0.006</b>     | 8     |    |
| <i>TGFB1</i>          | 221 | rs1800470 (p.Leu0Pro, c.29C>T, c.T29C)         | non-synonymous   | C vs T           | All   | 5  | 1,204  | 2,391   | 45.14 | 1.17 (0.95-1.44) | 0.142            | 66 | 12  | 0.02        | 0.31        | 1.00        | 1.12 (0.90-1.38) | 0.312            | 29    | 1.26 (0.89-1.78) | 0.197            | 68    |    |
| <i>TGFB1</i>          | 222 | rs4803455                                      | intron           | A vs C           | White | 3  | 2,786  | 3,516   | 47.48 | 1.10 (0.99-1.22) | 0.066            | 46 | 4   | 0.16        | 0.47        | 1.00        | 1.15 (0.99-1.34) | 0.066            | 39    | 1.16 (1.01-1.28) | <b>0.030</b>     | 0     |    |
| <i>TGFB1</i>          | 223 | rs1466445 (Frameshift in exon 1, *6A>9A)       | frameshift       | 9 bp del vs ins  | All   | 10 | 6,338  | 6,679   | 9.19  | 1.04 (0.96-1.13) | 0.379            | 1  | 9   | 0.43        | 0.39        | 1.00        | 1.06 (0.96-1.16) | 0.246            | 7     | 0.85 (0.58-1.23) | 0.373            | 0     |    |
| <i>TGFB1</i>          | 224 | rs334354 (intron, IVS7G>24A, c.1024+24G>A)     | intron           | A vs G           | All   | 4  | 1,226  | 2,786   | 26.71 | 1.08 (0.88-1.33) | 0.472            | 68 | 9   | 0.03        | 0.53        | 0.30        | 1.03 (0.78-1.36) | 0.834            | 71    | 1.38 (1.04-1.84) | <b>0.029</b>     | 8     |    |
| <i>TLR2</i>           | 225 | rs375291 (Leu512Phe)                           | non-synonymous   | A vs G (AG>GG)   | White | 3  | 4,867  | 5,604   | 9.23  | 0.94 (0.80-1.11) | 0.465            | 30 | 3   | 0.24        | 0.21        | 1.00        | 1.05 (0.92-1.20) | 0.211            | 0     | 0.94 (0.80-1.11) | 0.465            | 30    |    |
| <i>TLR4</i>           | 226 | rs11538898                                     | intergenic       | AA vs (AC>CC)    | White | 3  | 2,501  | 3,239   | 1.85  | 0.79 (0.37-1.67) | 0.529            | 53 | 4   | 0.12        | 0.61        | 0.20        |                  |                  |       | 0.79 (0.37-1.67) | 0.529            | 53    |    |
| <i>TLR4</i>           | 227 | rs1927911                                      | intron           | T vs C           | White | 3  | 2,512  | 3,276   | 27.79 | 0.99 (0.91-1.07) | 0.757            | 0  | 1   | 0.62        | 0.12        | 1.00        | 0.97 (0.88-1.08) | 0.575            | 0     | 1.03 (0.85-1.25) | 0.757            | 0     |    |
| <i>TLR4</i>           | 228 | rs4986790 (p.Asp299Gly)                        | non-synonymous   | T vs C           | White | 3  | 714    | 1,156   | 4.28  | 1.27 (0.67-2.4)  | 0.459            | 68 | 6   | 0.04        | 0.38        | 0.31        | 1.2 (0.66-2.19)  | 0.542            | 62    |                  |                  |       |    |
| <i>TLR4</i>           | 229 | rs4986791 (Thr399Ile)                          | non-synonymous   | T vs C           | White | 4  | 3,054  | 3,632   | 5.37  | 1.07 (0.84-1.37) | 0.564            | 16 | 4   | 0.31        | 0.28        | 1.00        | 1.08 (0.83-1.41) | 0.583            | 20    |                  |                  |       |    |
| <i>TNF</i>            | 230 | rs1799724 (nearGene-5, -857C>T)                | intergenic       | T vs C           | White | 3  | 745    | 732     | 13.05 | 0.97 (0.72-1.30) | 0.818            | 36 | 3   | 0.21        | 0.89        | 1.00        | 0.96 (0.69-1.34) | 0.795            | 40    |                  |                  |       |    |
| <i>TNF</i>            | 231 | rs1800629 (nearGene-5, G.308A)                 | non-synonymous   | A vs G           | All   | 11 | 2,296  | 2,283   | 13.78 | 1.28 (1.16-1.2)  | <b>0.046</b>     | 71 | 24  | 0.00        | 0.39        | 0.48        | 1.27 (0.99-1.64) | 0.065            | 67    | 1.41 (0.81-2.46) | 0.222            | 51    |    |
| <i>TP53</i>           | 232 | rs1042522 (p.Pro72Arg, c.215C>G)               | non-synonymous   | C vs T           | White | 3  | 10,515 | 12,909  | 31.28 | 1 (0.92-1.1)     | 0.922            | 72 | 107 | 0.00        | 0.48        | <b>0.00</b> | 1.01 (0.9-1.12)  | 0.906            | 67    | 1.01 (0.9-1.12)  | 0.875            | 52    |    |
| <i>TP53</i>           | 233 | rs17878362 (nearGene-5, IVS3 16bp Del/Ins)     | intergenic       | 16 bp ins vs del | White | 5  | 1,569  | 1,891   | 15.49 | 0.96 (0.73-1.28) | 0.787            | 73 | 15  | 0.01        | 0.69        | <b>0.01</b> | 0.96 (0.70-1.32) | 0.810            | 72    | 0.92 (0.57-1.48) | 0.719            | 0     |    |
| <i>TP73</i>           | 234 | G4C14(AAT14)                                   | Combined variant | mutation vs wild | All   | 4  | 858    | 1,168   | 24.02 | 1.20 (1.04-1.40) | <b>0.015</b>     | 6  | 3   | 0.36        | 0.11        | 1.00        | 1.10 (0.83-1.45) | 0.509            | 55    | 1.74 (1.22-2.48) | <b>0.002</b>     | 0     |    |
| <i>TPMS/TS</i>        | 235 | 28-bp tandem repeat                            | STR              | 3R vs 2R         | All   | 7  | 3,220  | 3,900   | 37.17 | 1.13 (0.97-1.32) | 0.215            | 66 | 18  | 0.01        | <b>0.03</b> | 0.64        | 1.13 (0.93-1.36) | 0.213            | 55    | 1.17 (0.89-1.52) | 0.264            | 56    |    |
| <i>TPMS/TS</i>        | 236 | rs16430 (UTR-3, 1494 ins/del6, -C(TTTAA)       | 3' UTR           | 6 bp del vs ins  | All   | 5  | 3,796  | 3,963   | 32.35 | 0.99 (0.89-1.09) | 0.310            | 38 | 6   | 0.17        | 0.56        | 1.00        | 1.01 (0.92-1.1)  | 0.903            | 0     | 0.9 (0.69-1.18)  | 0.430            | 59    |    |
| <i>UBD</i>            | 237 | rs2076485 (168T)                               | non-synonymous   | C vs T           | White | 3  | 4,281  | 6,157   | 26.07 | 1.07 (1.01-1.14) | <b>0.034</b>     | 0  | 1   | 0.77        | 0.63        | 1.00        | 1.08 (0.99-1.16) | 0.073            | 0     | 1.15 (0.97-1.35) | 0.103            | 12    |    |
| <i>UGT1A1</i>         | 238 | rs1092302 (intron, c.862-9898G>A, c.-3156G>A)  | intron           | A vs G           | All   | 3  | 1,560  | 1,987   | 35.68 | 1.03 (0.93-1.14) | 0.535            | 0  | 0   | 0.85        | 0.52        | 1.00        | 1.03 (0.89-1.19) | 0.689            | 0     | 1.07 (0.87-1.32) | 0.509            | 0     |    |
| <i>UGT1A1</i>         | 239 | rs4124874 (intron, c.862-10021T>G, c.-3279T>G) | intron           | G vs T           | All   | 3  | 1,560  | 1,987   | 50.35 | 1.05 (0.91-1.22) | 0.472            | 42 | 3   | 0.18        | 0.80        | 1.00        | 1.06 (0.72-1.57) | 0.772            | 70    | 1.07 (0.88-1.21) | 0.741            | 0     |    |
| <i>UGT1A1</i>         | 240 | rs8175347                                      | STR              | TA7 vs TA6       | All   | 8  | 3,345  | 4,177   | 32.46 | 1.00 (0.90-1.1)  | 0.920            | 43 | 12  | 0.09        | 0.67        | 0.02        | 0.99 (0.85-1.15) | 0.860            | 55    | 1.02 (0.88-1.19) | 0.761            | 0     |    |
| <i>UGT1A6</i>         | 241 | rs1105879 (p.Arg184Ser, c.552A>C)              | non-synonymous   | C vs A           | White | 3  | 4,006  | 4,295   | 34.33 | 0.97 (0.91-1.04) | 0.401            | 0  | 0   | 0.97        | 0.47        | 1.00        | 0.95 (0.87-1.03) | 0.222            | 0     | 1.01 (0.88-1.15) | 0.897            | 0     |    |
| <i>UGT1A6</i>         | 242 | T181A1R184S                                    | Combined variant | mutation vs wild | White | 4  | 3,066  | 3,915   | 34.41 | 1.04 (0.97-1.12) | 0.303            | 10 | 3   | 0.35        | 0.89        | 1.00        | 1.07 (0.96-1.18) | 0.238            | 11    | 1.03 (0.89-1.18) | 0.719            | 0     |    |
| <i>UGT1A7</i>         | 243 | Phenotype                                      | phenotype        | low vs high      | All   | 5  | 1,174  | 1,533   | 30.37 | 1.23 (0.97-1.55) | 0.084            | 73 | 15  | 0.01        | 0.53        | 0.64        | 1.25 (0.95-1.65) | 0.110            | 65    | 1.32 (0.88-1.97) | 0.177            | 59    |    |
| <i>UGT1A7</i>         | 244 | rs17868323 (N129K)                             | non-synonymous   | T vs G           | White | 3  | 1,545  | 1,930   | 31.37 | 0.90 (0.77-1.05) | 0.168            | 31 | 3   | 0.24        | 0.53        | 0.48        | 0.88 (0.77-1.01) | 0.070            | 0     | 0.83 (0.56-1.12) | 0.337            | 43    |    |
| <i>VDR</i>            | 245 | rs11568820                                     | 5' UTR           | (AA>AG) vs GG    | White | 4  | 3,228  | 3,455   | 36.61 | 1.15 (1.04-1.27) | <b>0.005</b>     | 0  | 0   | 0.93        | 0.42        | 0.58        | 1.15 (1.04-1.27) | <b>0.005</b>     | 0     |                  |                  |       |    |

**Webappendix table 2. Included studies for the genetic variants showing a statistically significant association with colorectal-cancer risk from meta-analyses, based on all available data or ethnicity-specific data**

| Gene                          | Variant                    | Ethnicity | Studies | References                                                                             |
|-------------------------------|----------------------------|-----------|---------|----------------------------------------------------------------------------------------|
| <b>37 variants in table 3</b> |                            |           |         |                                                                                        |
| <i>APC</i>                    | rs1801155 (I1307K, T3920A) | Jewish    | 3       | 1-3                                                                                    |
| <i>CHEK2</i>                  | rs17879961 (Ile200Thr)     | White     | 6       | 4-8                                                                                    |
| <i>CHEK2</i>                  | 1100delC (fs381X)          | White     | 7       | 4, 6, 9-13                                                                             |
| <i>CYP1A1</i>                 | rs1048943 (*2C, Ile462Val) | All       | 16      | 14-28                                                                                  |
| <i>CYP2E1</i>                 | 96-bp insertion            | All       | 4       | 29-32                                                                                  |
| <i>DNMT3B</i>                 | rs1569686 (39179G>T)       | All       | 4       | 33-36                                                                                  |
| <i>GHI</i>                    | rs2665802 (c.456+90T>A)    | All       | 7       | 37-40                                                                                  |
| <i>GSTM1</i>                  | Present/Null               | All       | 56      | 14, 15, 18, 19, 22-25, 38, 41-82                                                       |
| <i>GSTT1</i>                  | Present/Null               | All       | 43      | 14, 15, 18, 22, 25, 38, 41, 42, 44-46, 48-58, 60, 61, 64-70, 73, 75, 76, 78, 79, 81-83 |
| <i>IGFBP3</i>                 | rs2854746 (Ala32Gly)       | All       | 5       | 84-88                                                                                  |
| <i>MLH1</i>                   | rs63750447 (Val384Asp)     | Asian     | 3       | 89-91                                                                                  |
| <i>MLH1</i>                   | rs1800734 (-93G>A)         | White     | 5       | 92-96                                                                                  |
| <i>MLH1</i>                   | rs121912963 (D132H)        | All       | 3       | 90, 97                                                                                 |
| <i>MMP1</i>                   | rs1799750 (-1607 1G/2G)    | All       | 8       | 98-105                                                                                 |
| <i>MSH3</i>                   | rs184967 (Arg949Gln)       | White     | 3       | 7, 94, 106                                                                             |
| <i>MSH3</i>                   | rs26279 (Ala1045Thr)       | White     | 4       | 7, 94, 106, 107                                                                        |
| <i>MTHFD1</i>                 | rs1950902 (Arg134Lys)      | White     | 3       | 7, 108, 109                                                                            |
| <i>MUTYH</i>                  | rs34612342 (Tyr165Cys)     | White     | 17      | 110-124                                                                                |
| <i>MUTYH</i>                  | rs36053993 (Gly382Asp)     | White     | 17      | 110-124                                                                                |
| <i>MUTYH</i>                  | Monoallelic mutation       | White     | 17      | 110-124                                                                                |
| <i>MUTYH</i>                  | Biallelic mutation         | White     | 17      | 110-124                                                                                |
| <i>NAT2</i>                   | Phenotype                  | All       | 35      | 15, 16, 19, 23, 24, 47, 57, 62, 71, 125-149                                            |
| <i>NOD2/CARD15</i>            | rs2066847 (L1007fs)        | White     | 11      | 150-160                                                                                |
| <i>NOD2/CARD15</i>            | rs2066844 (Arg702Trp)      | White     | 9       | 150-158                                                                                |
| <i>PTGS1/COX1</i>             | rs5788 (Gly213Gly)         | White     | 4       | 38, 161, 162                                                                           |
| <i>PTGS2/COX2</i>             | rs689466                   | All       | 9       | 161, 163-168                                                                           |
| <i>SCD</i>                    | rs7849                     | All       | 3       | 161, 169                                                                               |
| <i>TERT</i>                   | rs2736100                  | White     | 8       | 170, 171                                                                               |
| <i>TGFB1</i>                  | rs1800469 (C-509T)         | All       | 10      | 172-180                                                                                |
| <i>TNF</i>                    | rs1800629                  | All       | 11      | 153, 180-188                                                                           |
| <i>TP73</i>                   | G4C14/A4T14                | All       | 4       | 189-192                                                                                |
| <i>UBD</i>                    | rs2076485 (I68T)           | White     | 3       | 7, 162                                                                                 |
| <i>VDR</i>                    | rs11568820                 | White     | 4       | 193-196                                                                                |
| <i>VDR</i>                    | rs1544410 (BsmI)           | All       | 17      | 38, 194, 197-207                                                                       |
| <i>VEGF</i>                   | rs3025039 (C936T)          | All       | 6       | 175, 208-212                                                                           |



|                              |                             |       |    |                                      |
|------------------------------|-----------------------------|-------|----|--------------------------------------|
| <i>XPA</i>                   | rs1800975                   | White | 3  | 213-215                              |
| <i>XPC</i>                   | rs2228001 (Gln939Lys)       | All   | 9  | 213, 215-220                         |
| <b>8 variants in table 4</b> |                             |       |    |                                      |
| <i>CDH1</i>                  | rs16260 (-160C>A)           | White | 6  | 221-225                              |
| <i>MTRR</i>                  | rs1801394 (Ile22Met)        | Asian | 3  | 226-228                              |
| <i>NFKB1</i>                 | rs28362491 (-94ins/delATTG) | White | 6  | 229-231                              |
| <i>OGG1</i>                  | rs1052133 (Ser326Cys)       | White | 14 | 38, 114, 117, 213, 217, 218, 232-238 |
| <i>PTGS2/COX2</i>            | rs20417                     | Asian | 4  | 167, 239, 240                        |
| <i>NQO1</i>                  | rs1800566 (Pro187Ser)       | White | 8  | 7, 25, 38, 46, 241-244               |
| <i>TCF7L2</i>                | rs7903146                   | White | 3  | 182, 245, 246                        |
| <i>TP53</i>                  | rs1042522                   | Asian | 8  | 192, 247-253                         |

---

Appendix table 3 Detailed information for genetic variants nominally significantly associated with colorectal-cancer risk in meta-analyses of all available data or ethnicity-specific data

| Genes                                                                   | Variants             | Alleles * | Chromosome | Frequency (%)† | Ethnicity | Number evaluated |                | Colorectal-cancer risk meta-analysis |                              |                    |                        | Venice criteria (p-value) | Risk-positive report probability‡ | Cumulative evidence of association | Amount of Evidence  |          | Protection from bias | Reasons for bias | Initial study reference |             | Deviation from HW‡                                      | Identified by GWAS if # controls | OR<1.15               | Modified p            | Excess p   |                                        |      |      |      |
|-------------------------------------------------------------------------|----------------------|-----------|------------|----------------|-----------|------------------|----------------|--------------------------------------|------------------------------|--------------------|------------------------|---------------------------|-----------------------------------|------------------------------------|---------------------|----------|----------------------|------------------|-------------------------|-------------|---------------------------------------------------------|----------------------------------|-----------------------|-----------------------|------------|----------------------------------------|------|------|------|
|                                                                         |                      |           |            |                |           | Studies          | Cases Controls | Genetic models                       | OR (95% CI)                  | P value            | I <sup>2</sup> (%)     |                           |                                   |                                    | P <sub>hetero</sub> | Number   |                      |                  | Grade                   | OR (95% CI) |                                                         |                                  |                       |                       |            | p-value                                |      |      |      |
| <b>Associations identified by analysis of all available data</b>        |                      |           |            |                |           |                  |                |                                      |                              |                    |                        |                           |                                   |                                    |                     |          |                      |                  |                         |             |                                                         |                                  |                       |                       |            |                                        |      |      |      |
| APC                                                                     | rs1801155            | AT        | 5          | 6.80           | Irish     | 3                | 804            | 6,188                                | Dominant                     | 1.96 (1.37-2.79)   | 1.99-10 <sup>-4</sup>  | 0                         | 0.84                              | BAA                                | 0.007               | Strong   | 492                  | B                | A                       | A           | NA                                                      | 2.11 (1.31-3.39)                 | 0.002                 | Not tested            | NA         | No                                     | 0.64 | 1.00 |      |
| CH22                                                                    | 110046C              | -         | 22         | 0.71           | White     | 7                | 3,874          | 11,630                               | Dominant                     | 1.88 (1.29-2.73)   | 0.001                  | 0                         | 0.50                              | -AA                                | 0.036               | Strong   | 142                  | ×                | A                       | A           | NA                                                      | 1.28 (1.05-2.38)                 | 0.029                 | Not tested            | NA         | No                                     | 0.77 | 1.00 |      |
| CH22                                                                    | rs17879961           | CT        | 22         | 3.91           | White     | 6                | 6,042          | 17,051                               | Dominant                     | 1.56 (1.32-1.84)   | 1.22-10 <sup>-7</sup>  | 0                         | 0.76                              | BAA                                | <0.001              | Strong   | 898                  | B                | A                       | A           | NA                                                      | 1.58 (1.30-1.91)                 | 4.43-10 <sup>-6</sup> | Not tested            | NA         | No                                     | 0.29 | 0.10 |      |
| CYP11A1                                                                 | rs1040943            | GA        | 15         | 10.04          | All       | 16               | 6,704          | 8,009                                | Additive                     | 1.24 (1.05-1.47)   | 0.014                  | 74                        | 0.00                              | ACC                                | 0.338               | Weak     | 3,194                | A                | C                       | HWE, GWAS   | NA                                                      | 1.21 (1.01-1.45)                 | 0.034                 | Yes                   | No         | 0.31                                   | 0.78 |      |      |
| CYP2E1                                                                  | 96-bp insertion      | -         | 10         | 16.98          | All       | 4                | 1,412          | 1,781                                | Additive                     | 1.24 (1.03-1.49)   | 0.023                  | 35                        | 0.20                              | ABA                                | 0.462               | Weak     | 1,175                | A                | B                       | A           | NA                                                      | 1.38 (1.01-1.89)                 | 0.044                 | No                    | NA         | No                                     | 0.25 | 1.00 |      |
| DNMT3B                                                                  | rs1569686            | GT        | 20         | 16.99          | All       | 4                | 1,054          | 1,224                                | Additive                     | 0.57 (0.47-0.68)   | 1.86-10 <sup>-9</sup>  | 0                         | 0.99                              | BAA                                | <0.001              | Strong   | 657                  | B                | A                       | A           | exempted                                                | Highly consistent of OR          | 0.56 (0.45-0.70)      | 2.22-10 <sup>-7</sup> | No         | No                                     | 0    | 0.81 | 1.00 |
| GHI                                                                     | rs265802             | AT        | 17         | 45.39          | All       | 7                | 3,275          | 3,848                                | Additive                     | 0.89 (0.80-0.99)   | 0.025                  | 49                        | 0.07                              | ABC                                | 0.508               | Weak     | 6,123                | A                | B                       | C           | Low OR, GWAS, Small study                               | NA                               | 0.93 (0.87-0.99)      | 0.024                 | No         | No                                     | Yes  | 0.03 | 1.00 |
| GSTM1                                                                   | Present/Null         | NA        | 1          | 50.64          | All       | 56               | 20,552         | 31,419                               | null vs present              | 1.10 (1.04-1.17)   | 0.001                  | 48                        | 0.00                              | ABC                                | 0.046               | Moderate | 28,715               | A                | B                       | C           | low OR, Small study, excess of significant studies      | NA                               | 1.10 (1.04-1.17)      | 0.001                 | NA         | NA                                     | Yes  | 0.00 | 0.06 |
| GSTT1                                                                   | Present/Null         | NA        | 22         | 29.53          | All       | 43               | 15,144         | 23,847                               | null vs present              | 1.15 (1.05-1.27)   | 0.004                  | 68                        | 0.00                              | ACC                                | 0.144               | Weak     | 11,515               | A                | C                       | C           | excess of significant studies                           | NA                               | 1.16 (1.05-1.27)      | 0.004                 | NA         | NA                                     | No   | 0.28 | 0.03 |
| IGFBP3                                                                  | rs2854746            | GC        | 7          | 46.08          | All       | 5                | 4,282          | 7,365                                | Additive                     | 1.07 (1.01-1.14)   | 0.016                  | 0                         | 0.07                              | AAC                                | 0.447               | Weak     | 10,895               | A                | A                       | C           | First study, HWE, GWAS                                  | NA                               | 1.06 (1.00-1.13)      | 0.064                 | Yes        | No                                     | Yes  | 0.68 | 1.00 |
| MLH1                                                                    | rs121912963          | C/G       | 3          | 0.43           | All       | 3                | 1,412          | 1,508                                | Additive                     | 2.74 (1.51-5.75)   | 0.008                  | 15                        | 0.31                              | -AC                                | 0.231               | Weak     | 48                   | ×                | A                       | C           | First study                                             | NA                               | 1.95 (0.86-4.42)      | 0.108                 | No         | NA                                     | No   | 0.75 | 1.00 |
| MLH1                                                                    | rs1800734            | A/G       | 3          | 21.11          | White     | 5                | 801            | 10,890                               | Additive                     | 1.51 (1.34-1.69)   | 6.74-10 <sup>-12</sup> | 46                        | 0.11                              | AAA                                | <0.001              | Strong   | 5,061                | A                | B                       | A           | Small study, exempted                                   | Highly consistent of OR          | 1.47 (1.30-1.66)      | 7.75-10 <sup>-6</sup> | No         | No                                     | Yes  | 0.02 | 1.00 |
| MLH1                                                                    | rs63750447           | AT        | 3          | 1.96           | Asian     | 3                | 937            | 919                                  | Additive                     | 2.14 (1.12-4.12)   | 0.022                  | 41                        | 0.18                              | BBC                                | 0.458               | Weak     | 102                  | B                | B                       | C           | First study, Small study                                | NA                               | 1.61 (0.89-2.91)      | 0.117                 | No         | NA                                     | No   | 0.04 | 1.00 |
| MMP3                                                                    | rs1799750            | 2G1G      | 11         | 39.63          | All       | 8                | 1,477          | 1,751                                | Additive                     | 0.76 (0.64-0.92)   | 0.004                  | 61                        | 0.01                              | ACC                                | 0.138               | Weak     | 2,439                | A                | C                       | C           | Small study, GWAS                                       | NA                               | 0.78 (0.64-0.95)      | 0.012                 | No         | No                                     | 0.09 | 0.15 |      |
| MSH3                                                                    | rs184967             | AG        | 5          | 15.25          | White     | 3                | 5,085          | 7,136                                | Additive                     | 1.11 (1.03-1.20)   | 0.005                  | 0                         | 0.38                              | AAC                                | 0.182               | Weak     | 3,857                | A                | A                       | C           | GWAS, Low OR, Small study                               | NA                               | 1.09 (1.01-1.18)      | 0.023                 | No         | No                                     | Yes  | 0.09 | 1.00 |
| MSH3                                                                    | rs26279              | G/A       | 5          | 28.13          | White     | 4                | 5,691          | 7,665                                | Additive                     | 1.1 (1.03-1.17)    | 0.006                  | 17                        | 0.31                              | AAC                                | 0.157               | Weak     | 7,697                | A                | A                       | C           | First study, GWAS, Low OR                               | NA                               | 1.11 (0.99-1.24)      | 0.085                 | No         | No                                     | Yes  | 0.71 | 0.60 |
| MTHFD1                                                                  | rs195902             | AG        | 14         | 18.78          | White     | 3                | 3,822          | 5,452                                | Additive                     | 0.90 (0.84-0.98)   | 0.010                  | 0                         | 0.79                              | AAC                                | 0.275               | Weak     | 3,389                | A                | A                       | C           | First study, GWAS, Low OR                               | NA                               | 0.93 (0.82-1.06)      | 0.265                 | No         | No                                     | Yes  | 0.71 | 1.00 |
| MUTH                                                                    | Monofluoric mutation | NA        | 1          | 1.69           | White     | 17               | 25,981         | 18,811                               | Carriers vs wild homozygotes | 1.17 (1.01-1.34)   | 0.036                  | 0                         | 0.84                              | BAC                                | 0.546               | Weak     | 829                  | B                | A                       | C           | First study                                             | NA                               | 1.11 (0.95-1.30)      | 0.184                 | Not tested | NA                                     | No   | 0.15 | 1.00 |
| MUTH                                                                    | Biallelic mutation   | NA        | 1          | 0.01           | White     | 17               | 25,981         | 18,811                               | Carriers vs wild homozygotes | 10.19 (5.00-22.04) | 5.30-10 <sup>-10</sup> | 0                         | 0.88                              | -AA                                | <0.001              | Strong   | 105                  | ×                | A                       | A           | NA                                                      | NA                               | 9.29 (4.29-20.11)     | 1.51-10 <sup>-6</sup> | Not tested | NA                                     | No   | 0.23 | 0.16 |
| MUTH                                                                    | rs34612342           | GA        | 1          | 0.01           | White     | 17               | 27,041         | 19,641                               | GG vs AA                     | 3.32 (1.13-9.81)   | 0.030                  | 0                         | 1.00                              | -AA                                | 0.533               | Strong   | 18                   | ×                | A                       | A           | NA                                                      | NA                               | 3.32 (1.13-9.81)      | 0.030                 | Not tested | NA                                     | No   | 0.10 | 0.39 |
| MUTH                                                                    | rs56033993           | AG        | 1          | 0.00           | White     | 17               | 26,957         | 19,870                               | AA vs GG                     | 6.49 (2.57-1.35)   | 7.49-10 <sup>-5</sup>  | 0                         | 0.85                              | -AA                                | 0.003               | Strong   | 40                   | ×                | A                       | A           | NA                                                      | NA                               | 5.22 (1.94-14.01)     | 0.001                 | Not tested | NA                                     | No   | 0.80 | 0.76 |
| NAT2                                                                    | Fast/slow            | NA        | 8          | 47.39          | All       | 35               | 11,684         | 15,348                               | Slow vs fast                 | 0.94 (0.89-0.99)   | 0.023                  | 1                         | 0.45                              | AAC                                | 0.47                | Weak     | 12,622               | A                | A                       | C           | First study, Low OR                                     | NA                               | 0.96 (0.91-1.01)      | 0.096                 | Not tested | NA                                     | Yes  | 0.79 | 0.69 |
| ND2                                                                     | rs206844             | T/C       | 16         | 6.15           | White     | 9                | 3,297          | 3,088                                | Dominant                     | 1.35 (1.02-1.78)   | 0.038                  | 34                        | 0.14                              | BBC                                | 0.581               | Weak     | 436                  | B                | B                       | C           | First study, Small study, excess of significant studies | NA                               | 1.25 (0.98-1.60)      | 0.072                 | Not tested | NA                                     | No   | 0.02 | 1.00 |
| ND2                                                                     | rs206847             | C/-       | 16         | 6.21           | White     | 11               | 4,337          | 5,395                                | Dominant                     | 1.30 (1.02-1.65)   | 0.032                  | 33                        | 0.13                              | BBC                                | 0.546               | Weak     | 641                  | B                | B                       | C           | First study                                             | NA                               | 1.23 (0.98-1.55)      | 0.074                 | Not tested | NA                                     | No   | 0.53 | 0.35 |
| PTGS1                                                                   | rs788                | AG        | 9          | 13.35          | White     | 4                | 3,989          | 6,659                                | Additive                     | 1.13 (1.04-1.22)   | 0.004                  | 0                         | 0.64                              | AAC                                | 0.113               | Weak     | 2,953                | A                | A                       | C           | GWAS, Low OR                                            | NA                               | 1.11 (1.01-1.22)      | 0.027                 | No         | NA                                     | Yes  | 0.27 | 1.00 |
| PTGS2                                                                   | rs689466             | AG        | 1          | 30.34          | All       | 9                | 4,076          | 7,610                                | Additive                     | 0.88 (0.80-0.98)   | 0.018                  | 56                        | 0.02                              | ACC                                | 0.405               | Weak     | 6,664                | A                | C                       | C           | HWE, GWAS, Low OR                                       | NA                               | 0.91 (0.84-0.99)      | 0.032                 | Yes        | No                                     | Yes  | 0.23 | 1.00 |
| SCD                                                                     | rs7849               | G/A       | 10         | 18.49          | All       | 3                | 2,011          | 2,580                                | Additive                     | 0.85 (0.73-0.98)   | 0.025                  | 29                        | 0.25                              | ABC                                | 0.488               | Weak     | 1,631                | A                | B                       | C           | HWE, GWAS                                               | NA                               | 0.76 (0.62-0.92)      | 0.005                 | Yes        | No                                     | Yes  | 0.11 | 1.00 |
| TERF                                                                    | rs276100             | T/G       | 5          | 49.34          | White     | 8                | 16,176         | 18,135                               | Additive                     | 1.07 (1.04-1.1)    | 2.92-10 <sup>-5</sup>  | 0                         | 0.53                              | ACC                                | 0.001               | Moderate | 34,514               | A                | A                       | C           | low OR                                                  | NA                               | 1.07 (1.04-1.1)       | 2.34-10 <sup>-5</sup> | No         | Yes                                    | 0.30 | 0.44 |      |
| TFEB1                                                                   | rs1800469            | T/C       | 19         | 38.74          | All       | 10               | 4,405          | 5,383                                | Additive                     | 0.88 (0.79-0.97)   | 0.013                  | 55                        | 0.02                              | ACC                                | 0.33                | Weak     | 7,257                | A                | C                       | C           | GWAS, Low OR                                            | NA                               | 0.90 (0.81-0.99)      | 0.031                 | Yes        | No                                     | Yes  | 0.97 | 0.71 |
| TNF                                                                     | rs1800629            | AG        | 6          | 13.78          | All       | 11               | 2,296          | 2,283                                | Additive                     | 1.28 (1.1-1.62)    | 0.046                  | 71                        | 0.00                              | ACC                                | 0.625               | Weak     | 1,403                | A                | C                       | C           | First study, HWE, GWAS                                  | NA                               | 1.27 (0.99-1.63)      | 0.055                 | Yes        | No                                     | Yes  | 0.39 | 0.48 |
| TP53                                                                    | G/C1/A/C/T14         | NA        | 1          | 24.02          | All       | 4                | 458            | 1,168                                | Additive                     | 1.20 (1.04-1.40)   | 0.015                  | 6                         | 0.36                              | AAC                                | 0.363               | Weak     | 1,037                | A                | A                       | C           | First study                                             | NA                               | 1.10 (0.91-1.32)      | 0.350                 | Yes        | NA                                     | No   | 0.11 | 1.00 |
| UBD                                                                     | rs2074485            | CT        | 6          | 26.07          | White     | 3                | 4,281          | 6,157                                | Additive                     | 1.07 (1.01-1.14)   | 0.034                  | 0                         | 0.77                              | AAC                                | 0.563               | Weak     | 5,523                | A                | A                       | C           | First study, GWAS, Low OR                               | NA                               | 1.08 (0.98-1.18)      | 0.109                 | No         | No                                     | Yes  | 0.63 | 1.00 |
| VDR                                                                     | rs1568820            | AG        | 12         | 36.61          | White     | 4                | 3,228          | 3,455                                | Dominant                     | 1.15 (1.04-1.27)   | 0.005                  | 0                         | 0.93                              | AAB                                | 0.165               | Weak     | 2,551                | A                | A                       | B           | GWAS                                                    | NA                               | 1.14 (1.03-1.27)      | 0.010                 | Not tested | NA                                     | No   | 0.42 | 0.58 |
| VDR                                                                     | rs154410             | AG        | 12         | 38.96          | All       | 17               | 11,687         | 12,301                               | Additive                     | 0.85 (0.72-0.99)   | 0.040                  | 93                        | 0.00                              | ACC                                | 0.87                | Weak     | 18,394               | A                | C                       | C           | First study, HWE, GWAS, excess of significant studies   | NA                               | 0.97 (0.93-1.02)      | 0.271                 | Yes        | No                                     | Yes  | 0.38 | 0.05 |
| VGF                                                                     | rs3025039            | T/C       | 6          | 19.43          | All       | 6                | 1,925          | 1,884                                | Additive                     | 1.19 (1.04-1.37)   | 0.014                  | 29                        | 0.22                              | ABC                                | 0.347               | Weak     | 558                  | A                | A                       | C           | HWE, GWAS                                               | NA                               | 1.15 (1.00-1.33)      | 0.046                 | Yes        | No                                     | Yes  | 0.94 | 1.00 |
| XPA                                                                     | rs1800975            | AG        | 9          | 36.46          | White     | 3                | 593            | 1,137                                | Additive                     | 0.82 (0.70-0.96)   | 0.016                  | 4                         | 0.36                              | AAC                                | 0.379               | Weak     | 1,218                | A                | A                       | C           | GWAS, Small study                                       | NA                               | 0.70 (0.53-0.92)      | 0.011                 | No         | No                                     | No   | 0.06 | 0.57 |
| XPC                                                                     | rs2228001            | C/A       | 3          | 37.38          | All       | 9                | 2,978          | 5,204                                | Additive                     | 1.08 (1.01-1.16)   | 0.021                  | 0                         | 0.83                              | AAC                                | 0.486               | Weak     | 6,248                | A                | A                       | C           | low OR, GWAS                                            | NA                               | 1.09 (1.01-1.17)      | 0.029                 | No         | No                                     | Yes  | 0.58 | 0.61 |
| <b>Associations identified from additional analyses by ethnic group</b> |                      |           |            |                |           |                  |                |                                      |                              |                    |                        |                           |                                   |                                    |                     |          |                      |                  |                         |             |                                                         |                                  |                       |                       |            |                                        |      |      |      |
| CDH1                                                                    | rs16260              | A/C       | 16         | 28.02          | White     | 6                | 6,761          | 6,646                                | Additive                     | 0.93 (0.87-1.00)   | 0.048                  | 23                        | 0.26                              | AAC                                | 0.642               | Weak     | 7,296                | A                | A                       | C           | First study, Low OR                                     | NA                               | 0.95 (0.85-1.07)      | 0.408                 | No         | Yes (rs9929218, r <sup>2</sup> =0.915) | Yes  | 0.53 | 0.28 |
| MTRR                                                                    | rs1801394            | A/G       | 5          | 44.65          | White     | 10               | 6,430          | 9,746                                | Additive                     | 0.98 (0.93-1.02)   | 0.030                  | 4                         | 0.41                              | AAC                                | 0.535               | Weak     | 1,510                | A                | A                       | C           | First study, HWE, GWAS                                  | NA                               | 0.82 (0.61-1.12)      | 0.212                 | Yes        | No                                     | No   | 0.84 | 1.00 |
| NGO1                                                                    | rs1800566            | T/C       | 16         | 17.88          | White     | 8                | 6,293          | 6,566                                | Additive                     | 1.09 (1.03-1.16)   | 0.006                  | 0                         | 0.50                              | AAC                                | 0.183               | Weak     | 4,765                | A                | A                       | C           | Low OR, GWAS                                            | NA                               | 1.08 (1.01-1.15)      | 0.026                 | No         | NA                                     | Yes  | 0.28 | 0.34 |
| OGG1                                                                    | rs105133             | G/C       | 3          | 21.59          | White     | 14               | 5,908          | 7,555                                | Additive                     | 1.15 (1.01-1.32)   | 0.033                  | 74                        | 0.00                              | ACC                                | 0.558               | Weak     | 5,879                | A                | C                       | C           | First study, HWE, GWAS                                  | NA                               | 1.16 (1.00-1.3        |                       |            |                                        |      |      |      |

Appendix table 4 Detailed information for additional genetic variants nominally significantly associated with colorectal-cancer risk in meta-analyses using dominant or recessive models

| Genes                 | Variants   | Alleles * | Chromosome | MAF (%)† | Ethnicity | Number evaluated |        |          | Colorectal-cancer risk meta-analysis |                   |         |                    | Venice criteria grade‡ | False-positive report probability§ | Cumulative evidence of association | Amount of Evidence         |         |       | Protection from Bias | Reason for Bias | Reason for Bias exception                          | Initial study influence |                   | Deviation from HWE | GWAS # common variants | OR<1.1§ | Modified p | Excess p |         |
|-----------------------|------------|-----------|------------|----------|-----------|------------------|--------|----------|--------------------------------------|-------------------|---------|--------------------|------------------------|------------------------------------|------------------------------------|----------------------------|---------|-------|----------------------|-----------------|----------------------------------------------------|-------------------------|-------------------|--------------------|------------------------|---------|------------|----------|---------|
|                       |            |           |            |          |           | Studies          | Cases  | Controls | Genetic models                       | OR (95% CI)       | P value | I <sup>2</sup> (%) |                        |                                    |                                    | P <sub>heterogeneity</sub> | Numbers | Grade |                      |                 |                                                    | Replication             | OR (95% CI)       |                    |                        |         |            |          | p-value |
| <i>SELS</i>           | rs34713741 | T/C       | 15         | 33.22    | All       | 3                | 1,442  | 2,071    | Dominant                             | 1.21 (1.05-1.39)  | 0.008   | 0                  | 0.40                   | AAC                                | 0.235                              | Weak                       | 2,046   | A     | A                    | C               | First study, HWE, GWAS                             | NA                      | 1.15 (0.98-1.36)  | 0.086              | Yes                    | No      | No         | 0.96     | 1.00    |
| <i>SERPINE1/PAL-1</i> | rs1799889  | 5G/4G     | 7          | 44.94    | White     | 4                | 2,241  | 4,534    | Dominant                             | 0.87 (0.78-0.97)  | 0.014   | 0                  | 0.56                   | AAC                                | 0.337                              | Weak                       | 4,705   | A     | A                    | C               | First study, HWE, GWAS, Low OR                     | NA                      | 0.90 (0.77-1.04)  | 0.144              | No                     | No      | Yes        | 0.84     | 1.00    |
| <i>EPHX1</i>          | rs2234922  | G/A       | 1          | 19.38    | All       | 13               | 5,329  | 6,700    | Dominant                             | 0.91 (0.85-0.99)  | 0.020   | 0                  | 0.50                   | AAC                                | 0.46                               | Weak                       | 4,113   | A     | A                    | C               | GWAS, Low OR                                       | NA                      | 0.91 (0.84-0.99)  | 0.025              | No                     | No      | Yes        | 0.45     | 0.28    |
| <i>ERCC3/XPG</i>      | rs17655    | C/G       | 13         | 24.75    | All       | 9                | 6,322  | 7,537    | Dominant                             | 1.13 (1.01-1.25)  | 0.027   | 38                 | 0.12                   | ABC                                | 0.48                               | Weak                       | 6,138   | A     | B                    | C               | GWAS, Low OR                                       | NA                      | 1.14 (1.02-1.27)  | 0.026              | No                     | No      | Yes        | 0.58     | 1.00    |
| <i>RAD18</i>          | rs373572   | C/T       | 3          | 29.22    | All       | 3                | 3,174  | 3,397    | Dominant                             | 1.18 (1.01-1.37)  | 0.033   | 27                 | 0.25                   | ABC                                | 0.55                               | Weak                       | 3,333   | A     | B                    | C               | GWAS, small study                                  | NA                      | 1.33 (1.06-1.67)  | 0.015              | No                     | No      | No         | 0.00     | 0.29    |
| <i>CCND1</i>          | rs9344     | A/G       | 11         | 48.15    | All       | 22               | 6,316  | 8,272    | Dominant                             | 1.13 (1.01-1.26)  | 0.035   | 43                 | 0.00                   | ABC                                | 0.569                              | Weak                       | 10,655  | A     | B                    | C               | studies                                            | NA                      | 1.11 (0.99-1.24)  | 0.071              | Yes                    | No      | Yes        | 0.42     | 0.08    |
| <i>IGF1</i>           | rs35767    | T/C       | 12         | 24.75    | All       | 3                | 2,717  | 4,880    | Recessive                            | 0.75 (0.62-0.91)  | 0.003   | 0                  | 0.57                   | BAC                                | 0.11                               | Weak                       | 528     | B     | A                    | C               | HWE                                                | NA                      | 0.73 (0.60-0.89)  | 0.002              | Yes                    | NA      | No         | 0.77     | 1.00    |
| <i>MGMT</i>           | rs12917    | T/C       | 10         | 12.99    | All       | 7                | 4,127  | 7,284    | Recessive                            | 1.54 (1.14-2.08)  | 0.005   | 0                  | 0.47                   | BAA                                | 0.158                              | Weak                       | 208     | B     | A                    | A               | NA                                                 | NA                      | 1.61 (1.14-2.28)  | 0.007              | Yes                    | NA      | No         | 0.96     | 1.00    |
| <i>CRP</i>            | rs1800947  | C/G       | 1          | 5.70     | All       | 4                | 2,916  | 3,544    | Recessive                            | 3.84 (1.38-10.74) | 0.010   | 0                  | 0.47                   | CAC                                | 0.277                              | Weak                       | 32      | C     | A                    | C               | First study                                        | NA                      | 2.78 (0.84-9.18)  | 0.093              | No                     | NA      | No         | 0.30     | 1.00    |
| <i>HPGD</i>           | rs2612656  | G/A       | 4          | 22.75    | White     | 3                | 2,979  | 5,575    | Recessive                            | 1.31 (1.05-1.64)  | 0.016   | 21                 | 0.28                   | BAC                                | 0.380                              | Weak                       | 450     | B     | A                    | C               | First study                                        | NA                      | 1.17 (0.91-1.50)  | 0.220              | No                     | NA      | No         | 0.45     | 1.00    |
| <i>FRZB</i>           | rs7775     | G/C       | 2          | 8.77     | White     | 3                | 1,256  | 3,000    | Recessive                            | 3.20 (1.17-8.73)  | 0.023   | 64                 | 0.06                   | CCC                                | 0.468                              | Weak                       | 55      | C     | C                    | C               | First study                                        | NA                      | 3.12 (0.61-15.94) | 0.171              | No                     | NA      | No         | 0.28     | 1.00    |
| <i>TGFBR1</i>         | rs334354   | A/G       | 9          | 26.71    | All       | 4                | 1,226  | 2,776    | Recessive                            | 1.38 (1.04-1.84)  | 0.029   | 8                  | 0.35                   | BAC                                | 0.516                              | Weak                       | 325     | B     | A                    | C               | First study                                        | NA                      | 1.24 (0.92-1.67)  | 0.158              | No                     | NA      | No         | 0.24     | 0.56    |
| <i>TGFBI</i>          | rs4803455  | A/C       | 19         | 47.48    | All       | 3                | 2,786  | 3,516    | Recessive                            | 1.14 (1.01-1.28)  | 0.030   | 0                  | 0.37                   | AAC                                | 0.536                              | Weak                       | 1,483   | A     | A                    | C               | First study, Low OR                                | NA                      | 1.04 (0.87-1.24)  | 0.646              | No                     | NA      | Yes        | 0.50     | 0.53    |
| <i>LIPC</i>           | rs6083     | A/G       | 15         | 36.52    | All       | 3                | 4,702  | 4,914    | Recessive                            | 0.85 (0.74-0.99)  | 0.032   | 25                 | 0.27                   | AAA                                | 0.56                               | Weak                       | 1,248   | A     | A                    | A               | NA                                                 | NA                      | 0.78 (0.65-0.94)  | 0.008              | No                     | NA      | No         | 0.98     | 1.00    |
| <i>MTHFR</i>          | rs1801133  | T/C       | 1          | 33.50    | All       | 68               | 32,608 | 44,383   | Recessive                            | 0.92 (0.85-1)     | 0.036   | 52                 | 0.00                   | ACC                                | 0.61                               | Weak                       | 9,072   | A     | C                    | C               | Low OR, small study, excess of significant studies | NA                      | 0.92 (0.86-1.00)  | 0.043              | No                     | NA      | Yes        | 0.06     | 0.00    |
| <i>CYP2C9</i>         | rs1799853  | T/C       | 10         | 13.31    | White     | 6                | 4,915  | 5,237    | Recessive                            | 1.36 (1.02-1.83)  | 0.038   | 0                  | 0.76                   | BAA                                | 0.60                               | Weak                       | 190     | B     | A                    | A               | NA                                                 | NA                      | 1.36 (1.01-1.83)  | 0.046              | No                     | NA      | No         | 0.31     | 0.47    |
| <i>MTRR</i>           | rs10380    | T/C       | 5          | 9.31     | White     | 4                | 3,869  | 5,141    | Recessive                            | 1.61 (1.02-2.52)  | 0.039   | 6                  | 0.36                   | BAA                                | 0.597                              | Weak                       | 93      | C     | A                    | A               | NA                                                 | NA                      | 2.24 (1.14-4.43)  | 0.020              | No                     | NA      | No         | 0.31     | 0.50    |

\* Minor alleles/major alleles (Per Caucasian)

† MAF=minor allele frequency in controls.

‡ Venice criteria grades are for amount of evidence, replication of the association, and protection from bias.

§ False-positive report probability (FPRP) was determined based on OR and P value of each variant from meta-analysis and a prior probability of 0.05.

Cumulative epidemiological evidence as graded by combination of results from Venice criteria and FPRP for association with colorectal-cancer risk.

Appendix table 5. Meta-analysis of associations between 267 genetic variants and colorectal-cancer risk by ethnicity

| Gene          | Variant ID | Genetic variant (Variation)                       | Comparison                 | Meta-analyses in Whites |       |          |                            |                             |         | Meta-analyses in Asians |         |       |                        |                             |             |         |                    |
|---------------|------------|---------------------------------------------------|----------------------------|-------------------------|-------|----------|----------------------------|-----------------------------|---------|-------------------------|---------|-------|------------------------|-----------------------------|-------------|---------|--------------------|
|               |            |                                                   |                            | Studies                 | Cases | Controls | Frequency (%) <sup>a</sup> | OR (95% CI)                 | P value | I <sup>2</sup> (%)      | Studies | Cases | Controls               | Frequency (%) <sup>a</sup>  | OR (95% CI) | P value | I <sup>2</sup> (%) |
| ABCB1         | 1          | rs1128503 (Giv412Gv)                              | T vs C                     |                         |       |          |                            |                             |         |                         |         |       |                        |                             |             |         |                    |
| ABCB1         | 2          | rs1202168                                         | T vs C                     | 4                       | 6,318 | 5,805    | 41.25 1.05 (0.97-1.14)     | 0.191                       | 55      |                         |         |       |                        |                             |             |         |                    |
| ABCB1         | 3          | rs2229109 (Ser400Asn)                             | A vs G                     | 3                       | 4,242 | 4,178    | 5.19 0.99 (0.86-1.13)      | 0.866                       | 0       |                         |         |       |                        |                             |             |         |                    |
| ABCB1         | 4          | rs868755                                          | T vs G                     | 3                       | 2,958 | 3,255    | 42.06 1.06 (0.99-1.14)     | 0.109                       | 0       |                         |         |       |                        |                             |             |         |                    |
| ABCB1         | 5          | rs9282564 (Asn21Asp)                              | G vs A                     | 4                       | 5,792 | 5,234    | 8.89 1.21 (0.78-1.88)      | 0.400                       | 96      |                         |         |       |                        |                             |             |         |                    |
| ABCB1/MDR1    | 6          | rs1045642 (p.Ile1145Ile, c.3435T>C)               | C vs T                     | 9                       | 5,983 | 6,669    | 47.20 1.00 (0.91-1.10)     | 0.977                       | 64      |                         |         |       |                        |                             |             |         |                    |
| ABCB1/MDR1    | 7          | rs2032582 (2677G>T)                               | T vs G                     | 3                       | 510   | 518      | 44.02 0.89 (0.74-1.06)     | 0.355                       | 3       |                         |         |       |                        |                             |             |         |                    |
| ACE           | 8          | 287-bp repeat (1D)                                | ins vs del                 | 3                       | 509   | 6,895    | 47.28 1.01 (0.87-1.18)     | 0.857                       | 0       |                         |         |       |                        |                             |             |         |                    |
| ADH1C/ADH2    | 9          | rs1229984 (ADH1B*2; HIS47ARG)                     | G vs A                     |                         |       |          |                            |                             |         | 5                       | 1,899   | 2,833 | 32.83 1.087            | 0.901                       | 0.384       | 68      |                    |
| ADH1C/ADH3    | 10         | rs698 (p.Ile350Phe/p.Ile350Val)                   | G vs A                     | 8                       | 4,132 | 7,242    | 39.59 1.02 (0.91-1.15)     | 0.732                       | 74      |                         |         |       |                        |                             |             |         |                    |
| ADIPOQ        | 11         | rs1501299                                         | T vs G                     |                         |       |          |                            |                             |         |                         |         |       |                        |                             |             |         |                    |
| ADIPOQ        | 12         | rs266729 (nearGene-5, C-11374G)                   | G vs C                     | 3                       | 2,795 | 2,979    | 33.28 0.97 (0.90-1.04)     | 0.411                       | 0       |                         |         |       |                        |                             |             |         |                    |
| ADIPOR1       | 13         | rs1342387                                         | C vs G                     |                         |       |          |                            |                             |         |                         |         |       |                        |                             |             |         |                    |
| ADIPOR1       | 14         | rs7539542                                         | A vs G                     |                         |       |          |                            |                             |         |                         |         |       |                        |                             |             |         |                    |
| ADH2          | 15         | rs671 (p.Glu487Lys/Glu504Lys, c.1510G>A)          | A vs G                     |                         |       |          |                            |                             |         | 7                       | 1,799   | 3,385 | 22.20 1.03 (0.83-1.27) | 0.811                       | 0.811       | 73      |                    |
| ALOX12/12-LOX | 16         | rs1126667 (p.Gln261Arg, c.782G>A)                 | A vs G                     | 3                       | 1,559 | 1,804    | 41.88 1.00 (0.8-1.16)      | 0.972                       | 46      |                         |         |       |                        |                             |             |         |                    |
| ALOX5         | 17         | rs4986832 (nearGene-5, -1708 G>A, g.3400G>A)      | A vs G                     |                         |       |          |                            |                             |         |                         |         |       |                        |                             |             |         |                    |
| APC           | 18         | rs1801155 (I1307K, T3920A)                        | carriers vs non-carriers   |                         |       |          |                            |                             |         |                         |         |       |                        |                             |             |         |                    |
| APC           | 19         | rs1801166 (E1317Q)                                | (CC>CG) vs GG              |                         |       |          |                            |                             |         |                         |         |       |                        |                             |             |         |                    |
| APC           | 20         | rs2229992 (p.Tyr486Tyr)                           | T vs C                     |                         |       |          |                            |                             |         |                         |         |       |                        |                             |             |         |                    |
| APC           | 21         | rs2229995 (p.Gly2502Ser, c.7504G>A)               | A vs G                     | 3                       | 1,130 | 1,626    | 1.75 1.25 (0.85-1.85)      | 0.258                       | 0       |                         |         |       |                        |                             |             |         |                    |
| APC           | 22         | rs41115 (p.Thr1493Thr)                            | C vs T                     |                         |       |          |                            |                             |         |                         |         |       |                        |                             |             |         |                    |
| APC           | 23         | rs42427 (p.Gly1678Gly)                            | G vs A                     |                         |       |          |                            |                             |         |                         |         |       |                        |                             |             |         |                    |
| APC           | 24         | rs459552 (p.Val1822Asp, c.5465T>A)                | A vs T                     | 7                       | 6,388 | 6,859    | 22.77 0.97 (0.91-1.03)     | 0.267                       | 0       |                         |         |       |                        |                             |             |         |                    |
| APC           | 25         | rs465899 (p.Pro1960Pro)                           | C vs T                     |                         |       |          |                            |                             |         |                         |         |       |                        |                             |             |         |                    |
| APEX1/APEX    | 26         | rs1048945 (p.Gln51His, c.153G>C)                  | C vs G                     | 3                       | 3,224 | 3,369    | 4.05 0.89 (0.63-1.25)      | 0.497                       | 41      |                         |         |       |                        |                             |             |         |                    |
| APEX1/APEX    | 27         | rs1130409 (p.Asp148Glu, c.444T>G)                 | G vs T                     | 8                       | 4,306 | 5,301    | 46.04 1.01 (0.86-1.19)     | 0.901                       | 36      |                         |         |       |                        |                             |             |         |                    |
| ARLTS1/ARL1   | 28         | rs34301344 (p.Trp1498Stop, c.446G>A)              | (AA>AG) vs GG              | 3                       | 1,367 | 1,862    | 0.99 1.00 (0.60-1.63)      | 0.992                       | 0       |                         |         |       |                        |                             |             |         |                    |
| ARLTS1/ARL1   | 29         | rs3803185 (p.Cys148Arg, T442C, T>C)               | C vs T                     | 4                       | 2,123 | 2,681    | 46.10 1.07 (0.99-1.17)     | 0.093                       | 0       |                         |         |       |                        |                             |             |         |                    |
| ATM           | 30         | rs1801673 (Ex37>62A>T, Asp1853Val)                | A vs G                     | 3                       | 2,879 | 6,384    | 0.66 0.77 (0.54-1.10)      | 0.144                       | 0       |                         |         |       |                        |                             |             |         |                    |
| AURKAS/STK15  | 31         | rs2273535 (p.Phe31Ile, c.91T>A)                   | A vs T                     | 5                       | 5,091 | 4,670    | 21.45 1.02 (0.94-1.10)     | 0.652                       | 8       |                         |         |       |                        |                             |             |         |                    |
| AXIN2         | 32         | rs2240308 (p.Pro50Ser, c.148C>T, G/A)             | A vs G                     | 3                       | 3,762 | 3,934    | 46.11 1.07 (0.98-1.17)     | 0.124                       | 29      |                         |         |       |                        |                             |             |         |                    |
| BLM           | 33         | ASH non-carriers/carriers                         | carriers vs non-carriers   |                         |       |          |                            |                             |         |                         |         |       |                        |                             |             |         |                    |
| BMP4          | 34         | rs17563 (p.Val152Ala, c.455T>C)                   | T vs C                     |                         |       |          |                            |                             |         |                         |         |       |                        |                             |             |         |                    |
| CASP8         | 35         | rs3834129 (nearGene-5, -652 6N del, -CTTACT)      | 6 bp ins vs del            | 5                       | 5,086 | 6,464    | 47.41 1.01 (0.94-1.09)     | 0.706                       | 20      |                         |         |       |                        |                             |             |         |                    |
| CASR          | 36         | rs1042636 (p.Arg990Gly, c.2968A>G)                | G vs A                     | 4                       | 6,298 | 7,839    | 8.52 1.00 (0.92-1.09)      | 0.936                       | 0       | 3                       | 1,563   | 2,893 | 21.90 1.13 (0.68-1.90) | 0.632                       | 95          |         |                    |
| CASR          | 37         | rs1801725 (p.Ala986Ser, c.2956G>T)                | T vs G                     | 3                       | 2,733 | 3,359    | 13.10 1.30 (0.99-1.72)     | 0.061                       | 84      |                         |         |       |                        |                             |             |         |                    |
| CBS           | 38         | rs5742905 (Ile278Thr, CBS E278T)                  | C vs T                     | 3                       | 2,504 | 3,723    | 8.22 1.05 (0.92-1.19)      | 0.489                       | 0       |                         |         |       |                        |                             |             |         |                    |
| CENPD         | 39         | rs9344 (rs603965, p.Pro241Pro, c.723G>A/c.870G>A) | A vs G                     | 10                      | 2,789 | 2,995    | 47.76 1.05 (0.95-1.16)     | 0.369                       | 35      | 4                       | 1,758   | 3,160 | 45.55 0.95 (0.82-1.09) | 0.462                       | 56          |         |                    |
| CDH1          | 40         | rs16240 (UTR-5, -160C>A)                          | A vs C                     | 6                       | 6,761 | 6,646    | 28.02 0.93 (0.87-1.00)     | <b>0.048</b>                | 23      |                         |         |       |                        |                             |             |         |                    |
| CDKN1A        | 41         | rs1059234 (UTR-3, c.*20C>T)                       | T vs C                     |                         |       |          |                            |                             |         |                         |         |       |                        |                             |             |         |                    |
| CDKN1A        | 42         | rs1801270 (n.Ser31Arg, c.93C>A)                   | A vs C                     |                         |       |          |                            |                             |         |                         |         |       |                        |                             |             |         |                    |
| CHEK2         | 43         | 1100delC (s381X)                                  | carriers vs non-carriers   | 7                       | 3,874 | 11,630   | 0.71 1.88 (1.29-2.73)      | <b>0.001</b>                | 0       |                         |         |       |                        |                             |             |         |                    |
| CHEK2         | 44         | rs17879961 (p.Ile200Thr)                          | carriers vs non-carriers   | 6                       | 6,042 | 17,051   | 3.91 1.56 (1.32-1.84)      | <b>1.22x10<sup>-7</sup></b> | 0       |                         |         |       |                        |                             |             |         |                    |
| COMT          | 45         | rs4680 (p.Val158Met, c.472G>A)                    | A vs G                     | 5                       | 5,074 | 5,239    | 48.89 1.05 (0.94-1.16)     | 0.390                       | 56      |                         |         |       |                        |                             |             |         |                    |
| CRP           | 46         | rs1205 (c.*1082G>A, 2042C>T)                      | T vs C                     | 3                       | 2,393 | 8,064    | 32.08 1.07 (0.99-1.16)     | 0.091                       | 0       |                         |         |       |                        |                             |             |         |                    |
| CRP           | 47         | rs1417938 (29T>A)                                 | A vs T                     | 3                       | 2,422 | 3,146    | 29.83 0.95 (0.85-1.06)     | 0.322                       | 34      |                         |         |       |                        |                             |             |         |                    |
| CRP           | 48         | rs1800947 (p.Leu184Leu, c.552G>C)                 | C vs G                     |                         |       |          |                            |                             |         |                         |         |       |                        |                             |             |         |                    |
| CTLA4         | 49         | rs231775 (p.Thr17Ala, c.49A>G)                    | G vs A                     |                         |       |          |                            |                             |         |                         |         |       |                        |                             |             |         |                    |
| CX3CR1        | 50         | rs3732378 (T280M)                                 | A vs G                     | 3                       | 3,143 | 3,269    | 16.95 1.00 (0.83-1.19)     | 0.968                       | 44      |                         |         |       |                        |                             |             |         |                    |
| CYP17A1       | 51         | rs743572                                          | G vs A                     | 3                       | 4,376 | 4,588    | 39.56 1.04 (0.91-1.18)     | 0.592                       | 67      |                         |         |       |                        |                             |             |         |                    |
| CYP17A1       | 52         | rs1048943 (*2C, m2, p.Ile462Val, c.1384A>C)       | G vs A                     | 10                      | 5,000 | 5,751    | 5.29 1.19 (1.04-1.36)      | <b>0.011</b>                | 17      | 5                       | 1,661   | 2,211 | 23.34 1.08 (0.90-1.28) | 0.425                       | 48          |         |                    |
| CYP11A1       | 53         | rs1799814 (Thr461Asp)                             | A vs C                     | 3                       | 3,155 | 3,394    | 4.36 0.75 (0.46-1.20)      | 0.227                       | 74      |                         |         |       |                        |                             |             |         |                    |
| CYP11A1       | 54         | rs4646903 (m1, MspI, UTR-3, T3801C)               | C vs T                     | 11                      | 6,418 | 7,152    | 11.57 1.03 (0.88-1.21)     | 0.686                       | 72      |                         |         |       |                        |                             |             |         |                    |
| CYP11A2       | 55         | rs2069514 (CYP11A2*1C, -3860G>A)                  | A vs G                     |                         |       |          |                            |                             |         |                         |         |       |                        |                             |             |         |                    |
| CYP11A2       | 56         | rs2470890 (CYP11A2*1B, Asn516Asn; 1545T>C)        | C vs T                     |                         |       |          |                            |                             |         | 3                       | 901     | 937   | 27.59 1.06 (0.79-1.42) | 0.697                       | 54          |         |                    |
| CYP11A2       | 57         | rs762551 (CYP11A2*1F, c.A-163C)                   | C vs A                     | 7                       | 5,608 | 5,968    | 29.46 1.02 (0.95-1.11)     | 0.547                       | 42      | 3                       | 279     | 429   | 36.25 1.03 (0.59-1.78) | 0.924                       | 82          |         |                    |
| CYP11B1       | 58         | rs10012 (p.Arg48Gly, c.142C>G)                    | G vs C                     | 4                       | 3,825 | 3,926    | 29.43 0.03 (0.94-1.14)     | 0.524                       | 44      |                         |         |       |                        |                             |             |         |                    |
| CYP11B1       | 59         | rs1056836 (CYP11B1*3, p.Leu432Val, c.1294C>G)     | G vs C                     | 9                       | 8,709 | 9,097    | 43.27 1.02 (0.97-1.06)     | 0.488                       | 0       |                         |         |       |                        |                             |             |         |                    |
| CYP11B1       | 60         | rs1800440 (p.Asn453Ser, c.1358A>G)                | G vs A                     | 6                       | 6,679 | 6,923    | 18.36 0.97 (0.88-1.07)     | 0.580                       | 53      |                         |         |       |                        |                             |             |         |                    |
| CYP2C19       | 61         | rs4244285 (Pro681Pro)                             | T vs C                     | 3                       | 2,557 | 2,664    | 14.94 0.91 (0.75-1.1)      | 0.337                       | 53      |                         |         |       |                        |                             |             |         |                    |
| CYP2C9        | 62         | R144C/I359L                                       | mutation vs wild           | 3                       | 2,424 | 3,053    | 18.54 0.94 (0.81-1.08)     | 0.362                       | 38      |                         |         |       |                        |                             |             |         |                    |
| CYP2C9        | 63         | rs1057910 (p.Ile359Leu, c.1075A>C)                | G vs A                     | 6                       | 6,474 | 6,835    | 6.82 0.95 (0.86-1.05)      | 0.307                       | 0       |                         |         |       |                        |                             |             |         |                    |
| CYP2C9        | 64         | rs1799853 (p.Arg144Cys, c.430C>T)                 | T vs C                     | 6                       | 4,915 | 5,237    | 13.31 0.98 (0.91-1.07)     | 0.668                       | 0       |                         |         |       |                        |                             |             |         |                    |
| CYP2D6        | 65         | rs3892097 (c.353-1G>A)                            | A vs G                     | 3                       | 798   | 1,512    | 20.07 1.03 (0.88-1.21)     | 0.684                       | 0       |                         |         |       |                        |                             |             |         |                    |
| CYP2E1        | 66         | 96-bp insertion                                   | insertion vs non-insertion |                         |       |          |                            |                             |         |                         |         |       |                        |                             |             |         |                    |
| CYP2E1        | 67         | rs2031920 (RsaI, c1>c2, C>T)                      | T vs C                     | 4                       | 2,146 | 2,237    | 3.93 1.21 (0.85-1.71)      | 0.284                       | 56      |                         |         |       |                        |                             |             |         |                    |
| CYP2E1        | 68         | rs3813867 (nearGene-5, g.3739G>C, c.-1293G>C)     | C vs G                     | 4                       | 2,345 | 2,867    | 3.56 0.84 (0.68-1.05)      | 0.131                       | 0       |                         |         |       |                        |                             |             |         |                    |
| CYP2E1        | 69         | rs6413432 (Intron, c.967+1143T>A, 7632T>A)        | A vs T                     | 3                       | 1,352 | 1,858    | 8.32 1.13 (0.67-1.92)      | 0.649                       | 78      |                         |         |       |                        |                             |             |         |                    |
| CYP3A4        | 70         | rs2740574                                         | G vs A                     | 3                       | 4,464 | 4,603    | 3.77 0.96 (0.83-1.12)      | 0.629                       | 0       |                         |         |       |                        |                             |             |         |                    |
| DNMT3B        | 71         | rs1569686 (nearGene-5, c.-6-1045G>T, 39179G>T)    | G vs T                     |                         |       |          |                            |                             |         | 3                       | 929     | 1,089 | 12.35 0.56 (0.45-0.70) | <b>2.60x10<sup>-7</sup></b> | 0           |         |                    |
| DNMT3B        | 72         | rs2424913 (Intron, c.307-49C>T, -149C>T)          | T vs C                     | 3                       | 1,717 | 2,899    | 43.83 0.96 (0.88-1.04)     | 0.298                       | 0       | 3                       | 681     | 1,374 | 98.98 1.67 (0.75-3.72) | 0.209                       | 0           |         |                    |
| DNMT3b        | 73         | rs406193                                          | T vs C                     | 3                       | 966   | 2,074    | 18.44 1.06 (0.84-1.33)     | 0.631                       | 49      |                         |         |       |                        |                             |             |         |                    |
| EPHX1         | 74         | rs1051740 (p.Tyr113His, c.337T>C)                 | C vs T                     | 13                      | 9,176 | 10,366   | 29.84 1.02 (0.96-1.08)     | 0.475                       | 34      |                         |         |       |                        |                             |             |         |                    |
| EPHX1         | 75         | rs2234922 (p.His139Arg, c.416A>G)                 | G vs A                     | 9                       | 4,132 | 4,922    | 19.69 1.00 (0.91-1.09)     | 0.930                       | 24      |                         |         |       |                        |                             |             |         |                    |
| ERCC1         | 76         | rs11615 (rs3177700, p.Asn118Asn, c.354T>C)        | C vs T                     | 5                       | 1,060 | 1,659    | 37.97 0.98 (0.87-1.10)     | 0.722                       | 0       |                         |         |       |                        |                             |             |         |                    |
| ERCC1         | 77         | rs3212986 (8092C>A)                               | (AA>AC) vs CC              |                         |       |          |                            |                             |         |                         |         |       |                        |                             |             |         |                    |
| ERCC2/XPD     | 78         | rs13181 (p.Lys751Gln, c.2251A>C)                  | C vs A                     | 14                      | 4,717 | 6,564    | 36.77 0.96 (0.90-1.03)     | 0.285                       | 21      |                         |         |       |                        |                             |             |         |                    |
| ERCC2/XPD     | 79         | rs1799793 (p.Asp312Asn, c.981G>A)                 | A vs G                     | 6                       | 5,069 | 5,967    | 34.74 1.02 (0.96-1.07)     | 0.593                       | 0       |                         |         |       |                        |                             |             |         |                    |
| ERCC4/XPF     | 80         | rs1800067 (R415Q)                                 | A vs G                     | 3                       | 3,173 | 3,206    | 10.61 1.01 (0.90-1.14)     | 0.826                       | 0       |                         |         |       |                        |                             |             |         |                    |
| ERCC5/XPG     | 81         | rs17655 (p.Asp1104His, c.3310G>C)                 | C vs G                     | 8                       | 5,294 | 6,452    | 21.33 1.04 (0.98-1.11)     | 0.184                       | 0       |                         |         |       |                        |                             |             |         |                    |
| ESR1          | 82         | rs2077647 (Ser10Ser)                              | C vs T                     | 3                       | 1,923 | 2,416    | 46.83 1.13 (0.85-1.5)      | 0.413                       | 70      |                         |         |       |                        |                             |             |         |                    |
| ESR1          | 83         | rs2234693                                         | C vs T                     |                         |       |          |                            |                             |         |                         |         |       |                        |                             |             |         |                    |

|        |     |                                                 |                  |    |        |        |       |      |              |              |    |    |       |       |       |      |             |              |    |
|--------|-----|-------------------------------------------------|------------------|----|--------|--------|-------|------|--------------|--------------|----|----|-------|-------|-------|------|-------------|--------------|----|
| FOLH1  | 88  | rs202676 (p.Tyr75His, c.223T>C)                 | C vs T           | 3  | 3,135  | 3,914  | 21.27 | 0.94 | (0.87-1.02)  | 0.165        | 0  |    |       |       |       |      |             |              |    |
| FRZB   | 89  | rs288326 (p.Arg200Trp, c.598C>T)                | T vs C           | 3  | 1,260  | 3,006  | 12.38 | 0.95 | (0.86-1.05)  | 0.312        | 0  |    |       |       |       |      |             |              |    |
| FRZB   | 90  | rs7775 (p.Arg324Gly, c.970C>G)                  | G vs C           | 3  | 1,256  | 3,000  | 8.77  | 1.17 | (0.88-1.56)  | 0.285        | 66 |    |       |       |       |      |             |              |    |
| GH1    | 91  | rs2665802 (c.456+90T>A)                         | A vs T           |    |        |        |       |      |              |              |    |    |       |       |       |      |             |              |    |
| GPX1   | 92  | rs1050450 (p.Pro200Leu, c.599C>T)               | T vs C           | 3  | 1,222  | 1,813  | 29.51 | 1.01 | (0.90-1.13)  | 0.920        | 0  |    |       |       |       |      |             |              |    |
| GPX4   | 93  | rs713041                                        | T vs C           |    |        |        |       |      |              |              |    |    |       |       |       |      |             |              |    |
| GSTA1  | 94  | *A>B                                            | mutation vs wild | 3  | 464    | 574    | 39.11 | 1.13 | (0.84-1.53)  | 0.418        | 62 |    |       |       |       |      |             |              |    |
| GSTA1  | 95  | rs3957357                                       | A vs G           | 3  | 1,313  | 1,327  | 39.90 | 1.01 | (0.91-1.12)  | 0.989        | 0  |    |       |       |       |      |             |              |    |
| GSTM1  | 96  | Present/Null                                    | null vs present  | 35 | 14,650 | 19,818 | 52.43 | 1.08 | (1.01-1.16)  | <b>0.037</b> | 53 | 12 | 4,739 | 9,929 | 50.10 | 1.04 | (0.96-1.19) | 0.360        | 0  |
| GSTM3  | 97  | rs1799735 (c.468+21delAGG, delAGG)              | AGG del vs ins   | 3  | 2,531  | 2,707  | 15.96 | 0.94 | (0.72-1.23)  | 0.653        | 83 |    |       |       |       |      |             |              |    |
| GSTP1  | 98  | rs1138272 (p.Ala114Val, c.341C>T)               | T vs C           | 8  | 6,858  | 7,207  | 10.23 | 0.89 | (0.77-1.02)  | 0.884        | 55 |    |       |       |       |      |             |              |    |
| GSTP1  | 99  | rs1695 (p.Ile105Val, c.313A>G)                  | G vs A           | 19 | 7,433  | 8,487  | 33.35 | 0.99 | (0.94-1.06)  | 0.055        | 28 | 7  | 1,622 | 5,660 | 18.74 | 0.89 | (0.80-1.00) | 0.057        | 0  |
| GSTT1  | 100 | Present/Null                                    | null vs present  | 26 | 9,684  | 12,638 | 19.20 | 1.24 | (1.08-1.44)  | <b>0.003</b> | 74 | 9  | 4,354 | 9,301 | 44.52 | 1.08 | (0.99-1.18) | 0.104        | 13 |
| GSTZ1  | 101 | rs3177427 (GLU32LYS)                            | A vs G           |    |        |        |       |      |              |              |    |    |       |       |       |      |             |              |    |
| HFE    | 102 | rs1799945 (H63D)                                | G vs C           | 7  | 3,729  | 4,079  | 14.70 | 1.03 | (0.93-1.15)  | 0.581        | 7  |    |       |       |       |      |             |              |    |
| HFE    | 103 | rs1800562 (rs111535158, p.Cys282Tyr, c.1005G>A) | A vs G           | 10 | 2,502  | 30,857 | 7.43  | 1.05 | (0.92-1.21)  | 0.467        | 0  |    |       |       |       |      |             |              |    |
| HIF1A  | 104 | rs11549465 (p.Pro582Ser, c.1744C>T)             | T vs C           |    |        |        |       |      |              |              |    |    |       |       |       |      |             |              |    |
| HPGD   | 105 | rs7349744                                       | C vs A           | 3  | 3,001  | 5,624  | 7.56  | 0.96 | (0.84-1.09)  | 0.516        | 11 |    |       |       |       |      |             |              |    |
| HPGD   | 106 | rs2612656                                       | G vs A           | 3  | 2,979  | 5,575  | 22.75 | 1.09 | (0.97-1.24)  | 0.162        | 65 |    |       |       |       |      |             |              |    |
| HPGD   | 107 | rs7349744                                       | A vs G           | 3  | 3,014  | 5,622  | 30.54 | 1.01 | (0.93-1.07)  | 0.897        | 0  |    |       |       |       |      |             |              |    |
| HPGD   | 108 | rs8752                                          | G vs A           | 3  | 3,008  | 5,632  | 41.98 | 1.01 | (0.86-1.17)  | 0.936        | 22 |    |       |       |       |      |             |              |    |
| HPGD   | 109 | rs9312555                                       | G vs A           | 3  | 3,015  | 5,634  | 15.42 | 0.93 | (0.86-1.02)  | 0.134        | 0  |    |       |       |       |      |             |              |    |
| ICAM1  | 110 | rs5498 (p.Lys469Glu, c.1405A>G)                 | G vs A           | 3  | 3,142  | 3,255  | 42.83 | 1.02 | (0.85-1.24)  | 0.819        | 70 |    |       |       |       |      |             |              |    |
| IGF1   | 111 | (CA)n (R19>non-R19)                             | non R19 vs R19   | 6  | 4,979  | 5,658  | 35.22 | 0.97 | (0.85-1.10)  | 0.594        | 78 |    |       |       |       |      |             |              |    |
| IGF1   | 112 | rs35767                                         | T vs C           |    |        |        |       |      |              |              |    |    |       |       |       |      |             |              |    |
| IGFBP1 | 113 | rs4619 (p.Ile253Met, c.759A>G)                  | G vs A           | 3  | 3,570  | 3,660  | 35.53 | 0.93 | (0.75-1.16)  | 0.535        | 85 |    |       |       |       |      |             |              |    |
| IGFBP3 | 114 | rs2854744 (nearGene-5, C-202A, A>C)             | C vs A           | 6  | 4,406  | 6,873  | 50.23 | 1.03 | (0.98-1.09)  | 0.240        | 0  |    |       |       |       |      |             |              |    |
| IGFBP3 | 115 | rs2854746 (p.Ala32Gly, c.95C>G)                 | G vs C           | 3  | 1,509  | 2,783  | 42.49 | 1.08 | (0.97-1.20)  | 0.174        | 0  |    |       |       |       |      |             |              |    |
| IL10   | 116 | rs1800872 (nearGene-5, g.4433A>C, -592C>A)      | A vs C           | 6  | 1,561  | 2,439  | 22.57 | 0.94 | (0.81-1.1)   | 0.444        | 41 |    |       |       |       |      |             |              |    |
| IL10   | 117 | rs1800896 (nearGene-5, g.3943A>G, -1082A>G)     | G vs A           | 5  | 1,134  | 1,492  | 46.68 | 0.98 | (0.84-1.15)  | 0.793        | 44 |    |       |       |       |      |             |              |    |
| IL16   | 118 | rs4072111 (p.Pro434Ser, c.1300C>T)              | T vs C           |    |        |        |       |      |              |              |    |    |       |       |       |      |             |              |    |
| IL1B   | 119 | rs1143627 (nearGene-5, g.4970C>T, -31T>C)       | C vs T           | 5  | 1,524  | 2,034  | 32.72 | 1.07 | (0.96-1.18)  | 0.209        | 0  |    |       |       |       |      |             |              |    |
| IL1B   | 120 | rs16944                                         | G vs A           |    |        |        |       |      |              |              |    |    |       |       |       |      |             |              |    |
| IL4    | 121 | rs2243250 (nearGene-5, -509C>T)                 | T vs C           | 6  | 1,225  | 1,754  | 18.93 | 0.92 | (0.76-1.12)  | 0.401        | 42 |    |       |       |       |      |             |              |    |
| IL4R   | 122 | rs1801275 (p.Gln576Arg, c.1727A>G)              | G vs A           | 3  | 633    | 887    | 19.90 | 1.05 | (0.87-1.26)  | 0.629        | 0  |    |       |       |       |      |             |              |    |
| IL4R   | 123 | rs1805012 (C431R)                               | G vs A           | 3  | 2,840  | 3,233  | 11.18 | 0.95 | (0.70-1.31)  | 0.764        | 59 |    |       |       |       |      |             |              |    |
| IL4R   | 124 | rs1805015 (S503P)                               | C vs T           | 3  | 640    | 892    | 16.26 | 1.02 | (0.84-1.25)  | 0.834        | 0  |    |       |       |       |      |             |              |    |
| IL6    | 125 | rs1800795                                       | C vs G           | 13 | 6,683  | 8,121  | 39.73 | 1.01 | (0.92-1.11)  | 0.822        | 68 |    |       |       |       |      |             |              |    |
| IL6    | 126 | rs1800797                                       | (AA+AG) vs GG    | 4  | 2,612  | 3,381  | 60.75 | 0.96 | (0.87-1.07)  | 0.468        | 0  |    |       |       |       |      |             |              |    |
| IL6R   | 127 | rs2228145 (rs8192284, Asp358Val)                | C vs A           | 3  | 3,070  | 20,173 | 30.92 | 0.97 | (0.91-1.04)  | 0.435        | 0  |    |       |       |       |      |             |              |    |
| IL8    | 128 | rs4073 (nearGene-5, T-251A)                     | A vs T           | 10 | 3,520  | 4,381  | 45.88 | 1.04 | (0.92-1.18)  | 0.525        | 70 |    |       |       |       |      |             |              |    |
| IRS1   | 129 | rs1801278 (p.Gly971Arg, c.2911G>A)              | A vs G           | 7  | 7,048  | 7,533  | 6.92  | 1.08 | (0.96-1.22)  | 0.219        | 39 |    |       |       |       |      |             |              |    |
| IRS2   | 130 | rs1805097 (p.Gly1057Asp, c.3170G>A)             | A vs G           | 3  | 2,318  | 2,814  | 41.13 | 0.96 | (0.89-1.04)  | 0.327        | 0  |    |       |       |       |      |             |              |    |
| LCT    | 131 | rs4988235 (c.1917+326C>T, 13910 C>T)            | T vs C           | 7  | 2,103  | 2,492  | 41.75 | 0.99 | (0.87-1.14)  | 0.879        | 51 |    |       |       |       |      |             |              |    |
| LEP    | 132 | rs7799039                                       | A vs G           | 3  | 2,324  | 2,776  | 43.98 | 0.95 | (0.88-1.03)  | 0.222        | 0  |    |       |       |       |      |             |              |    |
| LEPR   | 133 | rs1137101 (p.Gln223Arg, c.668A>G)               | G vs A           | 3  | 1,100  | 1,166  | 44.47 | 1.08 | (0.96-1.22)  | 0.187        | 0  |    |       |       |       |      |             |              |    |
| LIPC   | 134 | rs6083 (N215S)                                  | A vs G           |    |        |        |       |      |              |              |    |    |       |       |       |      |             |              |    |
| MBL2   | 135 | rs11003125                                      | G vs C           |    |        |        |       |      |              |              |    |    |       |       |       |      |             |              |    |
| MBL2   | 136 | rs1800450 (Gly54Asp)                            | A vs G           | 3  | 3,294  | 3,357  | 14.43 | 1.01 | (0.85-1.19)  | 0.936        | 37 |    |       |       |       |      |             |              |    |
| MBL2   | 137 | rs1800451 (p.Gly57Glu)                          | A vs G           |    |        |        |       |      |              |              |    |    |       |       |       |      |             |              |    |
| MBL2   | 138 | rs5030737 (R52C)                                | T vs C           | 3  | 1,083  | 1,023  | 7.09  | 1.02 | (0.81-1.30)  | 0.845        | 0  |    |       |       |       |      |             |              |    |
| MBL2   | 139 | rs7096206                                       | C vs G           |    |        |        |       |      |              |              |    |    |       |       |       |      |             |              |    |
| MDM2   | 140 | rs2279744 (nearGene-5, SNP309, c.14+309T>G)     | G vs T           | 6  | 1,613  | 886    | 37.36 | 1.03 | (0.90-1.18)  | 0.671        | 2  | 3  | 1,252 | 1,485 | 46.13 | 1.01 | (0.90-1.12) | 0.933        | 0  |
| MGMT   | 141 | rs12917 (p.Leu115Phe, c.343C>T)                 | T vs C           | 5  | 3,635  | 5,917  | 12.95 | 1.02 | (0.93-1.11)  | 0.745        | 0  |    |       |       |       |      |             |              |    |
| MGMT   | 142 | rs2308321 (p.Ile174Val, c.520A>G)               | G vs A           | 5  | 3,642  | 8,583  | 12.76 | 0.94 | (0.75-1.17)  | 0.565        | 74 |    |       |       |       |      |             |              |    |
| MLH1   | 143 | rs121912963 (p.D132H, c.415G>C)                 | C vs G           |    |        |        |       |      |              |              |    |    |       |       |       |      |             |              |    |
| MLH1   | 144 | rs1799977 (p.Ile219Val, c.655A>G)               | G vs A           | 8  | 6,117  | 8,385  | 31.41 | 1.00 | (0.92-1.12)  | 0.952        | 63 |    |       |       |       |      |             |              |    |
| MLH1   | 145 | rs1800734 (nearGene-5/UTR-5, -93G>A)            | A vs G           | 7  | 17,783 | 13,777 | 21.31 | 1.05 | (1.01-1.09)  | <b>0.014</b> | 0  |    |       |       |       |      |             |              |    |
| MLH1   | 146 | rs63750447 (p.Val384Asp, 1151 T>A)              | A vs T           |    |        |        |       |      |              |              |    | 3  | 937   | 919   | 1.96  | 2.14 | (1.12-4.12) | <b>0.022</b> | 41 |
| MLH1   | 147 | rs9876116 (Intron 14, c.1668-19A>G)             | G vs A           | 3  | 2,024  | 2,143  | 44.47 | 0.93 | (0.85-1.02)  | 0.631        | 15 |    |       |       |       |      |             |              |    |
| MMP1   | 148 | rs1799750 (nearGene-5, -1607 1G>2G)             | 2G vs 1G         | 3  | 678    | 842    | 50.30 | 0.80 | (0.61-1.05)  | 0.107        | 62 | 4  | 649   | 809   | 26.89 | 0.78 | (0.58-1.06) | 0.113        | 67 |
| MMP2   | 149 | rs243865 (-1306C>T)                             | T vs C           |    |        |        |       |      |              |              |    |    |       |       |       |      |             |              |    |
| MMP3   | 150 | rs3025058                                       | 5A vs 6A         | 3  | 660    | 869    | 47.07 | 1.03 | (0.89-1.19)  | 0.709        | 0  | 4  | 459   | 624   | 13.86 | 1.01 | (0.64-1.62) | 0.947        | 68 |
| MMP7   | 151 | rs11568818 (nearGene-5, -181A>G)                | G vs A           |    |        |        |       |      |              |              |    | 3  | 468   | 623   | 6.50  | 0.69 | (0.40-1.18) | 0.171        | 39 |
| MMP9   | 152 | rs3918242 (nearGene-5, g.3430C>T, -1562 C>T)    | T vs C           |    |        |        |       |      |              |              |    | 3  | 517   | 584   | 14.13 | 0.80 | (0.60-1.09) | 0.155        | 22 |
| MSH2   | 153 | rs2303425 (nearGene-5, g.4951T>C, c.-118T>C)    | C vs T           | 3  | 1,775  | 2,206  | 12.78 | 1.01 | (0.87-1.17)  | 0.944        | 14 |    |       |       |       |      |             |              |    |
| MSH2   | 154 | rs2303428 (c.2006-6T>C)                         | C vs T           | 4  | 4,264  | 4,260  | 9.62  | 0.96 | (0.866-1.07) | 0.496        | 4  |    |       |       |       |      |             |              |    |
| MSH2   | 155 | rs4987188 (p.Gly322Asp, c.965G>A)               | A vs G           | 5  | 3,697  | 3,491  | 1.49  | 1.22 | (0.94-1.58)  | 0.141        | 0  |    |       |       |       |      |             |              |    |
| MSH3   | 156 | rs184967 (p.Arg49Gln, c.3099G>A)                | A vs G           | 3  | 5,085  | 7,136  | 15.25 | 1.11 | (1.03-1.20)  | <b>0.005</b> | 0  |    |       |       |       |      |             |              |    |
| MSH3   | 157 | rs26279 (p.Ala1045Thr, c.3133C>A)               | G vs A           | 4  | 5,691  | 7,665  | 28.13 | 1.1  | (1.03-1.17)  | <b>0.006</b> | 17 |    |       |       |       |      |             |              |    |
| MSH6   | 158 | rs1042821 (p.Gly39Glu, c.116G>A)                | A vs G           | 4  | 3,136  | 6,063  | 17.22 | 0.99 | (0.86-1.13)  | 0.832        | 59 |    |       |       |       |      |             |              |    |
| MSH6   | 159 | rs1800935 (p.Asp180Asp, c.540T>C)               | C vs T           | 3  | 5,132  | 4,709  | 29.45 | 0.96 | (0.90-1.02)  | 0.159        | 0  |    |       |       |       |      |             |              |    |
| MTHFD1 | 160 | rs1950902 (p.Asn134Lys, c.401G>A)               | A vs G           | 3  | 3,822  | 5,452  | 18.78 | 0.90 | (0.84-0.98)  | <b>0.010</b> | 0  |    |       |       |       |      |             |              |    |
| MTHFD1 | 161 | rs2236225 (p.Arg65Gln, c.1958G>A)               | A vs G           | 6  | 6,535  | 9,347  | 45.19 | 0.98 | (0.90-1.07)  | 0.603        | 67 |    |       |       |       |      |             |              |    |
| MTHFR  | 162 | rs1801131 (p.Ala429Glu, c.1286A>C)              | C vs A           | 19 | 11,550 | 17,286 | 32.18 | 1.00 | (0.95-1.05)  | 0.895        | 29 | 8  | 1,886 | 2,868 | 19.37 | 0.95 | (0.83-1.09) | 0.449        | 29 |
| MTHFR  | 163 | rs1801133 (p.Ala222Val, c.C677T)                | T vs C           | 37 | 23,411 | 31,990 | 32.80 | 0.98 | (0.94-1.02)  | 0.230        | 52 | 15 | 5,731 | 6,920 | 41.49 | 0.95 | (0.87-1.03) | 0.181        | 52 |
| MTR    | 164 | rs1805087 (A2756G)                              | G vs A           | 14 | 11,730 | 15,669 | 19.51 | 0.97 | (0.92-1.05)  | 0.529        | 45 |    |       |       |       |      |             |              |    |
| MTRR   | 165 | rs10380 (p.His595Tyr, c.1783C>T)                | T vs C           | 4  | 3,869  | 5,141  | 9.31  | 1.05 | (0.87-1.26)  | 0.638        | 57 |    |       |       |       |      |             |              |    |
| MTRR   | 166 | rs1532268 (Ser175Leu)                           | T vs C           |    |        |        |       |      |              |              |    |    |       |       |       |      |             |              |    |



Appendix table 6. Results of previously published meta-analysis compared to meta-analyses performed in this study

| Genes   | Variant                | Prior meta-analysis |           |               |      |                                                                 |            |           |         |        |          | Current study     |                   |         |                            |                 |           |         |        |          |                  |                       |                            |                                         |
|---------|------------------------|---------------------|-----------|---------------|------|-----------------------------------------------------------------|------------|-----------|---------|--------|----------|-------------------|-------------------|---------|----------------------------|-----------------|-----------|---------|--------|----------|------------------|-----------------------|----------------------------|-----------------------------------------|
|         |                        | PubMed ID           | Reference | First author  | Year | Retrieved databases                                             | Close date | Ethnicity | Studies | Cases  | Controls | Comparison        | OR (95% CI)       | P value | P <sub>heterogeneity</sub> | Comparison      | Ethnicity | Studies | Cases  | Controls | OR (95% CI)      | P value               | P <sub>heterogeneity</sub> | Comments for prior meta-analyses        |
| APEXI   | rs1130409              | 1976250             | (1)       | Gu            | 2009 | PubMed and Embase                                               | 5/30/2009  | All       | 3       | 1,629  | 1,999    | GG versus TT      | 1.25 (1.03-1.52)  | NA      | 0.574                      | G vs T          | All       | 9       | 4,374  | 5,422    | 1.05 (0.89-1.23) | 0.582                 | 0.00                       |                                         |
|         | rs9344                 | 1884302             | (2)       | Pahalan       | 2008 | PubMed                                                          | NA         | All       | 16      | 4,638  | 6,157    | AA + AG vs GG     | 1.10 (0.96-1.26)  | 0.180   | 0.010                      | AA + AG vs GG   | All       | 22      | 6,316  | 8,272    | 1.13 (1.01-1.26) | 0.035                 | 0.02                       |                                         |
| CDND1   | rs16280                | 21997289            | (3)       | Wanz          | 2011 | Medline PubMed, CNKI, Wanfang Med Online                        | Jan. 2011  | All       | 8       | 4,652  | 4,428    | AA vs CC          | 0.86 (0.75-0.98)  | 0.020   | 0.100                      | A vs C          | All       | 9       | 7,229  | 7,045    | 0.94 (0.88-1.01) | 0.116                 | 0.26                       |                                         |
|         | rs1048943              | 21541661            | (4)       | Jin           | 2011 | PubMed                                                          | Sep. 2010  | All       | 6       | 5,236  | 6,236    | GG vs AA          | 1.47 (1.16-1.86)  | 0.002   | 0.440                      | G vs A          | All       | 16      | 6,704  | 8,094    | 1.24 (1.05-1.47) | 0.014                 | 0.00                       |                                         |
| CYP11A1 | rs1048943              | 21710246            | (5)       | Zheng         | 2011 | PubMed                                                          | 10/31/2010 | All       | 14      | 6,654  | 7,859    | GG vs AA          | 1.40 (1.12-1.76)  | 0.003   | 0.732                      | G vs A          | All       | 16      | 6,704  | 8,009    | 1.24 (1.05-1.47) | 0.014                 | 0.00                       |                                         |
|         | rs4646903              | 21710246            | (5)       | Zheng         | 2011 | PubMed                                                          | 10/31/2010 | All       | 13      | 5,468  | 6,492    | CC vs TT          | 0.95 (0.68-1.33)  | 0.758   | 0.079                      | C vs T          | All       | 14      | 5,491  | 6,371    | 1.06 (0.92-1.23) | 0.412                 | 0.00                       | Included 1 studies published in Chinese |
| ERCC2   | rs13181                | 21541661            | (6)       | Zhang         | 2011 | PubMed and Medline                                              | Dec. 2010  | All       | 15      | 3,042  | 4,627    | C vs A            | 1.02 (0.94-1.11)  | 0.623   | 0.593                      | C vs A          | All       | 17      | 6,039  | 8,749    | 0.99 (0.92-1.05) | 0.649                 | 0.17                       |                                         |
|         | rs1799793              | 21541661            | (6)       | Zhang         | 2011 | PubMed and Medline                                              | Dec. 2010  | All       | 7       | 1,581  | 2,846    | A vs G            | 1.07 (0.95-1.20)  | 0.275   | 0.057                      | A vs G          | All       | 7       | 5,470  | 7,135    | 1.01 (0.96-1.07) | 0.654                 | 0.68                       |                                         |
| GSTM1   | Present/Null           | 14523342            | (7)       | Ye            | 2003 | MEDLINE                                                         | 2002       | All       | 20      | 4,010  | 5,099    | null vs present   | 0.99 (0.91-1.07)  | NA      | <0.1                       | null vs present | All       | 54      | 18,601 | 29,433   | 1.11 (1.04-1.18) | 0.001                 | 0.00                       | Included 1 studies published in Chinese |
|         | rs2012161              | 20207535            | (9)       | Geo           | 2010 | PubMed, Embase and HuGENet                                      | Dec. 2008  | All       | 36      | 10,009 | 15,070   | null vs present   | 1.13 (1.03-1.23)  | NA      | <0.001                     | null vs present | All       | 54      | 18,601 | 29,433   | 1.11 (1.04-1.18) | 0.001                 | 0.00                       |                                         |
| GSTP1   | rs1695                 | 20207535            | (9)       | Economopoulos | 2010 | MEDLINE                                                         | Jul. 2009  | All       | 44      | 11,998 | 17,552   | null vs present   | 1.11 (1.04-1.19)  | NA      | NA                         | null vs present | All       | 54      | 18,601 | 29,433   | 1.11 (1.04-1.18) | 0.001                 | 0.00                       |                                         |
|         | Present/Null           | 19642601            | (10)      | Geo           | 2009 | PubMed, Embase and HuGENet                                      | Jan. 2009  | All       | 16      | 4,386  | 7,127    | G vs A            | 0.98 (0.92-1.04)  | NA      | 0.310                      | G vs A          | All       | 29      | 7,857  | 13,413   | 0.99 (0.93-1.05) | 0.676                 | 0.07                       |                                         |
| GSTT1   | Present/Null           | 19798506            | (11)      | Liao          | 2010 | PUBMED, EMBASE, Cochrane Library and HuGENet                    | Feb. 2009  | All       | 23      | 5,058  | 5,999    | null vs present   | 1.23 (1.02-1.49)  | 0.032   | <0.001                     | null vs present | All       | 41      | 13,201 | 21,862   | 1.16 (1.04-1.28) | 0.006                 | 0.00                       |                                         |
|         | rs20061204             | 20207535            | (9)       | Wan           | 2010 | PubMed, Embase                                                  | May. 2009  | All       | 30      | 7,635  | 12,911   | null vs present   | 1.20 (1.03-1.40)  | 0.020   | <0.001                     | null vs present | All       | 41      | 13,201 | 21,862   | 1.16 (1.04-1.28) | 0.006                 | 0.00                       |                                         |
| IGF1    | CA repeat              | 21919877            | (13)      | Zheng         | 2010 | Economopoulos                                                   | Jul. 2009  | All       | 34      | 8,596  | 13,589   | null vs present   | 1.20 (1.05-1.38)  | NA      | NA                         | null vs present | All       | 41      | 13,201 | 21,862   | 1.16 (1.04-1.28) | 0.006                 | 0.00                       |                                         |
|         | rs227744               | 20803107            | (15)      | Fang          | 2010 | PubMed, Web of Science, EBSCO, and CNKI                         | 3/1/2010   | All       | 7       | 2,543  | 2,115    | TT vs GG          | 0.86 (0.57-1.30)  | NA      | 0.006                      | G vs T          | All       | 8       | 2,421  | 1,802    | 1.00 (0.91-1.10) | 0.976                 | 0.53                       | Included 1 studies published in Chinese |
| MDM2    | rs12917                | 19892775            | (16)      | Zhang         | 2010 | MEDLINE                                                         | Apr. 2009  | All       | 4       | 1,618  | 4,685    | TT vs CT-CC       | 1.05 (0.44-2.49)  | 0.911   | 0.084                      | TT vs CT-CC     | All       | 7       | 4,127  | 7,284    | 1.54 (1.14-2.08) | 0.005                 | 0.47                       |                                         |
|         | rs2308321              | 19892775            | (16)      | Zhang         | 2010 | MEDLINE                                                         | Apr. 2009  | All       | 4       | 1,618  | 4,685    | G vs A            | 0.89 (0.63-1.25)  | 0.490   | 0.005                      | G vs A          | All       | 6       | 3,483  | 8,783    | 1.00 (0.80-1.25) | 0.984                 | 0.00                       |                                         |
| MMP1    | rs1799750              | 19507256            | (17)      | McColgan      | 2009 | PubMed, Embase, Google Scholar and Yahoo                        | July. 2008 | All       | 4       | 539    | 765      | 2G2G+1G2G vs 1G1G | 1.66 (1.14-2.42)  | 0.008   | NA                         | 2G vs 1G        | All       | 7       | 987    | 1,281    | 0.72 (0.60-0.87) | 6.74*10 <sup>-7</sup> | 0.07                       |                                         |
|         | rs243865               | 19507256            | (17)      | McColgan      | 2009 | PubMed, Embase, Google Scholar and Yahoo                        | July. 2008 | All       | 3       | 379    | 460      | TT-TC vs CC       | 0.97 (0.49-1.93)  | 0.810   | NA                         | T vs C          | All       | 3       | 300    | 401      | 0.99 (0.49-2.00) | 0.976                 | 0.03                       | Included 1 studies published in Chinese |
| MMP2    | rs243865               | 19507256            | (17)      | McColgan      | 2009 | PubMed, Embase, Google Scholar and Yahoo                        | July. 2008 | All       | 3       | 379    | 460      | TT-TC vs CC       | 0.83 (0.59-1.17)  | NA      | 0.080                      | T vs C          | All       | 3       | 300    | 401      | 0.99 (0.49-2.00) | 0.976                 | 0.03                       |                                         |
|         | rs3025058              | 19507256            | (17)      | McColgan      | 2009 | PubMed, Embase, Google Scholar and Yahoo                        | July. 2008 | All       | 3       | 379    | 460      | 5A5A+6A6A vs 6A5A | 0.83 (0.50-1.31)  | 0.810   | NA                         | 5A vs 6A        | All       | 6       | 649    | 990      | 0.98 (0.76-1.27) | 0.881                 | 0.08                       |                                         |
| MMP9    | rs3918242              | 19507256            | (17)      | McColgan      | 2009 | PubMed, Embase, Google Scholar and Yahoo                        | July. 2008 | All       | 5       | 700    | 963      | TT-TC vs CC       | 1.02 (0.73-1.42)  | NA      | 0.150                      | 5A vs 6A        | All       | 6       | 649    | 996      | 0.98 (0.76-1.27) | 0.881                 | 0.08                       |                                         |
|         | rs2043868              | 19507256            | (17)      | McColgan      | 2009 | PubMed, Embase, Google Scholar and Yahoo                        | July. 2008 | All       | 5       | 700    | 963      | TT-TC vs CC       | 0.9 (0.68-1.17)   | 0.430   | NA                         | T vs C          | All       | 4       | 644    | 792      | 0.87 (0.66-1.14) | 0.303                 | 0.26                       | Included 1 studies published in Chinese |
| MTHFR   | rs1801133              | 2043868             | (18)      | Liu           | 2011 | PubMed, Embase, ISI Web of Knowledge, and Medline               | July. 2010 | All       | 4       | NA     | NA       | TT-TC vs CC       | 0.85 (0.67-1.08)  | NA      | 0.430                      | T vs C          | All       | 4       | 644    | 792      | 0.87 (0.66-1.14) | 0.303                 | 0.26                       |                                         |
|         | rs1801133              | 17089256            | (19)      | Hahn          | 2006 | PubMed                                                          | Aug. 2006  | All       | 14      | 4,764  | 6,592    | TT vs CC          | 0.82 (0.74-0.91)  | 0.030   | 0.030                      | T vs C          | All       | 17      | 12,001 | 15,001   | 0.99 (0.95-1.03) | 0.611                 | 0.00                       |                                         |
| MTR     | rs1801133              | 17089256            | (19)      | Hahn          | 2006 | PubMed                                                          | Aug. 2006  | All       | 14      | 4,764  | 6,592    | TT vs CC          | 0.82 (0.74-0.91)  | 0.030   | 0.030                      | T vs C          | All       | 17      | 12,001 | 15,001   | 0.99 (0.95-1.03) | 0.611                 | 0.00                       |                                         |
|         | rs1805087              | 19826453            | (23)      | Yu            | 2010 | PubMed                                                          | May. 2008  | All       | 12      | 6,452  | 8,184    | G vs A            | 0.99 (0.90-1.08)  | NA      | NA                         | G vs A          | All       | 18      | 12,832 | 17,467   | 0.99 (0.93-1.04) | 0.653                 | 0.08                       |                                         |
| MTRR    | rs1801394              | 21547363            | (24)      | Han           | 2011 | PubMed and CNKI                                                 | 7/16/2010  | All       | 10      | NA     | NA       | G vs A            | 1.06 (0.99-1.13)  | 0.105   | 0.698                      | A vs G          | All       | 15      | 7,561  | 11,405   | 0.95 (0.91-1.00) | 0.052                 | 0.25                       |                                         |
|         | rs34612342             | 21063410            | (25)      | Theodoratos   | 2010 | Web of Science, PubMed                                          | NA         | All       | 15      | 25,231 | 18,285   | GG vs AA          | 3.35 (1.14-9.89)  | 0.030   | 0.990                      | G vs A          | White     | 17      | 27,041 | 19,641   | 3.32 (1.13-9.81) | 0.030                 | 1.00                       |                                         |
| NOD2    | rs3053393              | 21063410            | (25)      | Theodoratos   | 2010 | Web of Science, PubMed                                          | NA         | All       | 15      | 25,231 | 18,285   | GG vs AA          | 6.47 (2.33-17.97) | <0.0005 | 0.730                      | A vs G          | White     | 17      | 26,957 | 19,870   | 6.49 (2.57-1.35) | 7.49*10 <sup>-7</sup> | 0.85                       |                                         |
|         | rs2066844              | 19787357            | (26)      | Tian          | 2010 | Web of Science, PubMed, EMBASE                                  | Mar. 2009  | All       | 5       | 1,436  | 1,109    | TT-TC vs CC       | 1.59 (1.06-2.32)  | 0.020   | 0.140                      | TT-TC vs CC     | White     | 9       | 3,297  | 3,688    | 1.35 (1.02-1.78) | 0.038                 | 0.14                       |                                         |
| OGG1    | rs1052133              | 21063410            | (25)      | Theodoratos   | 2010 | Web of Science, PubMed, EMBASE                                  | Mar. 2009  | All       | 5       | 1,442  | 1,109    | CC-CG vs GG       | 1.98 (1.13-3.44)  | 0.010   | 0.660                      | C vs G          | White     | 8       | 3,252  | 2,988    | 1.31 (0.93-1.85) | 0.124                 | 0.44                       |                                         |
|         | rs2066847              | 19787357            | (26)      | Tian          | 2010 | Web of Science, PubMed, EMBASE                                  | Mar. 2009  | All       | 7       | 2,571  | 1,856    | ins vs wild       | 1.44 (1.13-1.84)  | 0.003   | 0.670                      | ins vs wild     | White     | 11      | 4,337  | 5,395    | 1.30 (1.02-1.65) | 0.032                 | 0.13                       |                                         |
| PPARG   | rs1052133              | 21063410            | (25)      | Theodoratos   | 2010 | Web of Science, PubMed, EMBASE                                  | 9/22/2010  | All       | 12      | NA     | NA       | GG vs CC          | 1.19 (0.92-1.53)  | NA      | 0.028                      | G vs C          | All       | 18      | 6,654  | 8,599    | 1.10 (0.99-1.23) | 0.085                 | 0.00                       |                                         |
|         | rs1801282              | 20596649            | (29)      | XU            | 2010 | PubMed and Google                                               | 1/1/2010   | All       | 10      | 6,878  | 9,391    | CG-GG vs CC       | 0.84 (0.72-0.98)  | NA      | 0.014                      | G vs C          | All       | 16      | 11,775 | 18,067   | 0.97 (0.90-1.04) | 0.568                 | 0.16                       |                                         |
| PTGS2   | rs355806               | 20596649            | (29)      | XU            | 2010 | PubMed, Embase, Web of Science, and CNKI                        | 1/1/2010   | All       | 3       | 486    | 941      | CT-TT vs CC       | 1.11 (0.89-1.39)  | NA      | 0.337                      | T vs C          | All       | 9       | 4,427  | 6,842    | 1.04 (0.95-1.13) | 0.435                 | 0.33                       |                                         |
|         | rs20417                | 19696967            | (30)      | Zhu           | 2010 | PubMed, Embase                                                  | 3/26/2009  | Asian     | 4       | 1,595  | 2,917    | CC-GC vs GG       | 1.44 (1.09-1.91)  | 0.010   | 0.140                      | C vs G          | All       | 12      | 3,527  | 5,844    | 1.06 (0.94-1.20) | 0.337                 | 0.16                       |                                         |
| SULT1A1 | rs9282861              | 20080859            | (31)      | Cao           | 2010 | Web of Science, MEDLINE, EMBASE and Chinese biomedical database | Jan. 2010  | All       | 10      | 3,322  | 5,166    | CC-GC vs GG       | 1.06 (0.94-1.19)  | NA      | 0.073                      | C vs G          | All       | 12      | 3,527  | 5,844    | 1.06 (0.94-1.20) | 0.337                 | 0.16                       |                                         |
|         | rs1800469              | 20012233            | (33)      | Fang          | 2010 | PubMed, Web of Science and CNKI                                 | Sep. 2010  | All       | 12      | 3,549  | 5,610    | A vs G            | 1.04 (0.94-1.16)  | 0.460   | 0.009                      | A vs G          | All       | 11      | 3,802  | 5,042    | 1.02 (0.92-1.12) | 0.757                 | 0.03                       | Included 1 studies published in Chinese |
| TGFB1   | rs11466445             | 12947057            | (34)      | Kalliamani    | 2003 | MEDLINE, CANCERLIT                                              | Apr. 2002  | All       | 3       | 546    | 642      | 6A6A vs 9A9A      | 2.19 (1.08-4.45)  | NA      | NA                         | 9 bp del vs ins | All       | 10      | 6,338  | 6,689    | 1.04 (0.96-1.13) | 0.379                 | 0.43                       |                                         |
|         | rs1800629              | 21248737            | (36)      | Wang          | 2011 | PubMed, Cochrane and Embase                                     | NA         | All       | 7       | 1,372  | 1,458    | AA-AA vs GG       | 0.84 (0.87-0.81)  | 0.150   | 0.770                      | C vs A          | All       | 10      | 6,338  | 6,689    | 1.04 (0.96-1.13) | 0.379                 | 0.43                       |                                         |
| TP53    | rs1042522              | 20615891            | (37)      | Dabubreh      | 2010 | MEDLINE, HuGENet, NBI Genetic Association Database              | 7/31/2009  | All       | 23      | 6,514  | 9,334    | C vs G            | 0.99 (0.89-1.09)  | 0.800   | <0.001                     | C vs G          | All       | 29      | 9,724  | 11,852   | 0.99 (0.90-1.09) | 0.826                 | 0.00                       |                                         |
|         | rs20363586             | 22011187            | (43)      | Hu            | 2011 | PubMed, Embase                                                  | Jan. 2010  | All       | 20      | 3,537  | 5,168    | CC vs GG          | 1.02 (0.80-1.29)  | NA      | 0.010                      | C vs G          | All       | 29      | 9,724  | 11,852   | 0.99 (0.90-1.09) | 0.826                 | 0.00                       |                                         |
| TP33    | rs2273953 vs rs1801173 | 21063410            | (25)      | Theodoratos   | 2010 | Web of Science, PubMed, EMBASE                                  | 7/20/2010  | All       | 27      | 7,414  | 9,872    | CC vs GG          | 1.04 (0.82-1.31)  | 0.766   | <0.001                     | C vs G          | All       | 29      | 9,724  | 11,852   | 0.99 (0.90-1.09) | 0.826                 | 0.00                       |                                         |

## References

1. Fidder HH, Figer A, Geva R, Flex D, Schayek H, Avidan B, et al. Genetic analyses in consecutive Israeli Jewish colorectal cancer patients. *Am J Gastroenterol*. 2005; **100**(6): 1376-80.
2. Woodage T, King SM, Wacholder S, Hartge P, Struwing JP, McAdams M, et al. The APC1307K allele and cancer risk in a community-based study of Ashkenazi Jews. *Nat Genet*. 1998; **20**(1): 62-5.
3. Laken SJ, Petersen GM, Gruber SB, Oddoux C, Ostrer H, Giardiello FM, et al. Familial colorectal cancer in Ashkenazim due to a hypermutable tract in APC. *Nat Genet*. 1997; **17**(1): 79-83.
4. Suchy J, Cybulski C, Wokolorczyk D, Oszurek O, Gorski B, Debniak T, et al. CHEK2 mutations and HNPCC-related colorectal cancer. *Int J Cancer*. 2010; **126**(12): 3005-9.
5. Konstantinova D, Kadiyska T, Sokolova V, Kaneva R, Mirchev M, Savov A, et al. CHEK2 I157T and colorectal cancer in Bulgaria. *Journal of BUON : official journal of the Balkan Union of Oncology*. 2010; **15**(2): 314-7.
6. Kleibl Z, Havranek O, Hlavata I, Novotny J, Sevcik J, Pohlreich P, et al. The CHEK2 gene I157T mutation and other alterations in its proximity increase the risk of sporadic colorectal cancer in the Czech population. *Eur J Cancer*. 2009; **45**(4): 618-24.
7. Webb EL, Rudd MF, Sellick GS, El Galta R, Bethke L, Wood W, et al. Search for low penetrance alleles for colorectal cancer through a scan of 1467 non-synonymous SNPs in 2575 cases and 2707 controls with validation by kin-cohort analysis of 14 704 first-degree relatives. *Hum Mol Genet*. 2006; **15**(21): 3263-71.
8. Kilpivaara O, Alhopuro P, Vahteristo P, Aaltonen LA, Nevanlinna H. CHEK2 I157T associates with familial and sporadic colorectal cancer. *J Med Genet*. 2006; **43**(7): e34.
9. Wasielewski M, Vasen H, Wijnen J, Hooning M, Dooijes D, Tops C, et al. CHEK2 1100delC is a susceptibility allele for HNPCC-related colorectal cancer. *Clin Cancer Res*. 2008; **14**(15): 4989-94.
10. Djureinovic T, Lindblom A, Dalen J, Dedorson S, Edler D, Hjern F, et al. The CHEK2 1100delC variant in Swedish colorectal cancer. *Anticancer Res*. 2006; **26**(6C): 4885-8.
11. de Jong MM, Nolte IM, Te Meerman GJ, van der Graaf WT, Mulder MJ, van der Steege G, et al. Colorectal cancer and the CHEK2 1100delC mutation. *Genes Chromosomes Cancer*. 2005; **43**(4): 377-82.
12. Meijers-Heijboer H, Wijnen J, Vasen H, Wasielewski M, Wagner A, Hollestelle A, et al. The CHEK2 1100delC mutation identifies families with a hereditary breast and colorectal cancer phenotype. *Am J Hum Genet*. 2003; **72**(5): 1308-14.
13. Kilpivaara O, Laiho P, Aaltonen LA, Nevanlinna H. CHEK2 1100delC and colorectal cancer. *J Med Genet*. 2003; **40**(10): e110.
14. Nisa H, Kono S, Yin G, Toyomura K, Nagano J, Mibu R, et al. Cigarette smoking, genetic polymorphisms and colorectal cancer risk: the Fukuoka Colorectal Cancer Study. *BMC Cancer*. 2010; **10**: 274.
15. Cleary SP, Cotterchio M, Shi E, Gallinger S, Harper P. Cigarette smoking, genetic variants in carcinogen-metabolizing enzymes, and colorectal cancer risk. *Am J Epidemiol*. 2010; **172**(9): 1000-14.
16. Kobayashi M, Otani T, Iwasaki M, Natsukawa S, Shaura K, Koizumi Y, et al. Association between dietary heterocyclic amine levels, genetic polymorphisms of NAT2, CYP1A1, and CYP1A2 and risk of colorectal cancer: a hospital-based case-control study in Japan. *Scand J Gastroenterol*. 2009; **44**(8): 952-9.
17. Pereira Serafim PV, Cotrim Guerreiro da Silva ID, Manoukias Forones N. Relationship between genetic polymorphism of CYP1A1 at codon 462 (Ile462Val) in colorectal cancer. *Int J Biol Markers*. 2008; **23**(1): 18-23.
18. Pande M, Amos CI, Osterwisch DR, Chen J, Lynch PM, Broaddus R, et al. Genetic variation in genes for the xenobiotic-metabolizing enzymes CYP1A1, EPHX1, GSTM1, GSTT1, and GSTP1 and susceptibility to colorectal cancer in Lynch syndrome. *Cancer Epidemiol Biomarkers Prev*. 2008; **17**(9): 2393-401.



19. Yoshida K, Osawa K, Kasahara M, Miyaishi A, Nakanishi K, Hayamizu S, et al. Association of CYP1A1, CYP1A2, GSTM1 and NAT2 gene polymorphisms with colorectal cancer and smoking. *Asian Pac J Cancer Prev.* 2007; **8**(3): 438-44.
20. Yeh CC, Sung FC, Tang R, Chang-Chieh CR, Hsieh LL. Association between polymorphisms of biotransformation and DNA-repair genes and risk of colorectal cancer in Taiwan. *J Biomed Sci.* 2007; **14**(2): 183-93.
21. Kiss I, Orsos Z, Gombos K, Bogner B, Csejtei A, Tibold A, et al. Association between allelic polymorphisms of metabolizing enzymes (CYP 1A1, CYP 1A2, CYP 2E1, mEH) and occurrence of colorectal cancer in Hungary. *Anticancer Res.* 2007; **27**(4C): 2931-7.
22. Little J, Sharp L, Masson LF, Brockton NT, Cotton SC, Haites NE, et al. Colorectal cancer and genetic polymorphisms of CYP1A1, GSTM1 and GSTT1: a case-control study in the Grampian region of Scotland. *Int J Cancer.* 2006; **119**(9): 2155-64.
23. Landi S, Gemignani F, Moreno V, Gioia-Patricola L, Chabrier A, Guino E, et al. A comprehensive analysis of phase I and phase II metabolism gene polymorphisms and risk of colorectal cancer. *Pharmacogenet Genomics.* 2005; **15**(8): 535-46.
24. Slattery ML, Samowitz W, Ma K, Murtaugh M, Sweeney C, Levin TR, et al. CYP1A1, cigarette smoking, and colon and rectal cancer. *Am J Epidemiol.* 2004; **160**(9): 842-52.
25. Sachse C, Smith G, Wilkie MJ, Barrett JH, Waxman R, Sullivan F, et al. A pharmacogenetic study to investigate the role of dietary carcinogens in the etiology of colorectal cancer. *Carcinogenesis.* 2002; **23**(11): 1839-49.
26. Ishibe N, Stampfer M, Hunter DJ, Hennekens C, Kelsey KT. A prospective study of cytochrome P450 1A1 polymorphisms and colorectal cancer risk in men. *Cancer Epidemiol Biomarkers Prev.* 2000; **9**(8): 855-6.
27. Sivaraman L, Leatham MP, Yee J, Wilkens LR, Lau AF, Le Marchand L. CYP1A1 genetic polymorphisms and in situ colorectal cancer. *Cancer Res.* 1994; **54**(14): 3692-5.
28. Hayashi S, Watanabe J, Kawajiri K. High susceptibility to lung cancer analyzed in terms of combined genotypes of P450IA1 and Mu-class glutathione S-transferase genes. *Japanese journal of cancer research : Gann.* 1992; **83**(8): 866-70.
29. Silva TD, Felipe AV, Pimenta CA, Barao K, Forones NM. CYP2E1 RsaI and 96-bp insertion genetic polymorphisms associated with risk for colorectal cancer. *Genetics and molecular research : GMR.* 2012; **11**(3): 3138-45.
30. Sameer AS, Nissar S, Qadri Q, Alam S, Baba SM, Siddiqi MA. Role of CYP2E1 genotypes in susceptibility to colorectal cancer in the Kashmiri population. *Hum Genomics.* 2011; **5**(6): 530-7.
31. Morita M, Le Marchand L, Kono S, Yin G, Toyomura K, Nagano J, et al. Genetic polymorphisms of CYP2E1 and risk of colorectal cancer: the Fukuoka Colorectal Cancer Study. *Cancer Epidemiol Biomarkers Prev.* 2009; **18**(1): 235-41.
32. Le Marchand L, Donlon T, Seifried A, Wilkens LR. Red meat intake, CYP2E1 genetic polymorphisms, and colorectal cancer risk. *Cancer Epidemiol Biomarkers Prev.* 2002; **11**(10 Pt 1): 1019-24.
33. Bao Q, He B, Pan Y, Tang Z, Zhang Y, Qu L, et al. Genetic variation in the promoter of DNMT3B is associated with the risk of colorectal cancer. *Int J Colorectal Dis.* 2011; **26**(9): 1107-12.
34. Fan H, Zhang F, Hu J, Liu D, Zhao Z. Promoter polymorphisms of DNMT3B and the risk of colorectal cancer in Chinese: a case-control study. *J Exp Clin Cancer Res.* 2008; **27**: 24.
35. Hong YS, Lee HJ, You CH, Roh MS, Kwak JY, Lee MJ, et al. DNMT3b 39179GT polymorphism and the risk of adenocarcinoma of the colon in Koreans. *Biochem Genet.* 2007; **45**(3-4): 155-63.
36. Daraei A, Salehi R, Mohamadhashem F. DNA-methyltransferase 3B 39179 G > T polymorphism and risk of sporadic colorectal cancer in a subset of Iranian population. *Journal of research in medical sciences : the official journal of Isfahan University of Medical Sciences.* 2011; **16**(6): 807-13.
37. Gao CM, Gong JP, Wu JZ, Cao HX, Ding JH, Zhou JN, et al. Relationship between growth hormone 1 genetic polymorphism and susceptibility to colorectal cancer. *J Hum Genet.* 2010; **55**(3): 163-6.

38. Kury S, Buecher B, Robiou-du-Pont S, Scoul C, Colman H, Le Neel T, et al. Low-penetrance alleles predisposing to sporadic colorectal cancers: a French case-controlled genetic association study. *BMC Cancer*. 2008; **8**: 326.
39. Houry-Shakour S, Gruber SB, Lejbkowitz F, Rennert HS, Raskin L, Pinchev M, et al. Recreational physical activity modifies the association between a common GH1 polymorphism and colorectal cancer risk. *Cancer Epidemiol Biomarkers Prev*. 2008; **17**(12): 3314-8.
40. Le Marchand L, Donlon T, Seifried A, Kaaks R, Rinaldi S, Wilkens LR. Association of a common polymorphism in the human GH1 gene with colorectal neoplasia. *J Natl Cancer Inst*. 2002; **94**(6): 454-60.
41. Wang J, Jiang J, Zhao Y, Gajalakshmi V, Kuriki K, Suzuki S, et al. Genetic polymorphisms of glutathione S-transferase genes and susceptibility to colorectal cancer: a case-control study in an Indian population. *Cancer Epidemiol*. 2011; **35**(1): 66-72.
42. Koh WP, Nelson HH, Yuan JM, Van den Berg D, Jin A, Wang R, et al. Glutathione S-transferase (GST) gene polymorphisms, cigarette smoking and colorectal cancer risk among Chinese in Singapore. *Carcinogenesis*. 2011; **32**(10): 1507-11.
43. Darazy M, Balbaa M, Mugharbil A, Saeed H, Sidani H, Abdel-Razzak Z. CYP1A1, CYP2E1, and GSTM1 gene polymorphisms and susceptibility to colorectal and gastric cancer among Lebanese. *Genet Test Mol Biomarkers*. 2011; **15**(6): 423-9.
44. Yeh CC, Lai CY, Hsieh LL, Tang R, Wu FY, Sung FC. Protein carbonyl levels, glutathione S-transferase polymorphisms and risk of colorectal cancer. *Carcinogenesis*. 2010; **31**(2): 228-33.
45. Yang G, Gao YT, Shu XO, Cai Q, Li GL, Li HL, et al. Isothiocyanate exposure, glutathione S-transferase polymorphisms, and colorectal cancer risk. *Am J Clin Nutr*. 2010; **91**(3): 704-11.
46. Hlavata I, Vrana D, Smerhovsky Z, Pardini B, Naccarati A, Vodicka P, et al. Association between exposure-relevant polymorphisms in CYP1B1, EPHX1, NQO1, GSTM1, GSTP1 and GSTT1 and risk of colorectal cancer in a Czech population. *Oncol Rep*. 2010; **24**(5): 1347-53.
47. Zupa A, Sgambato A, Bianchino G, Improta G, Grieco V, G LAT, et al. GSTM1 and NAT2 polymorphisms and colon, lung and bladder cancer risk: a case-control study. *Anticancer Res*. 2009; **29**(5): 1709-14.
48. Piao JM, Shin MH, Kweon SS, Kim HN, Choi JS, Bae WK, et al. Glutathione-S-transferase (GSTM1, GSTT1) and the risk of gastrointestinal cancer in a Korean population. *World J Gastroenterol*. 2009; **15**(45): 5716-21.
49. Matakova T, Sivonova M, Halasova E, Mistuna D, Dzian A, Masar J, et al. Polymorphisms of biotransforming enzymes (GSTs) and their association with colorectal cancer in the Slovak population. *Neoplasma*. 2009; **56**(5): 422-7.
50. Epplein M, Wilkens LR, Tiirikainen M, Dyba M, Chung FL, Goodman MT, et al. Urinary isothiocyanates; glutathione S-transferase M1, T1, and P1 polymorphisms; and risk of colorectal cancer: the Multiethnic Cohort Study. *Cancer Epidemiol Biomarkers Prev*. 2009; **18**(1): 314-20.
51. Csejtei A, Tibold A, Varga Z, Koltai K, Ember A, Orsos Z, et al. GSTM, GSTT and p53 polymorphisms as modifiers of clinical outcome in colorectal cancer. *Anticancer Res*. 2008; **28**(3B): 1917-22.
52. Skjelbred CF, Saebo M, Hjartaker A, Grotmol T, Hansteen IL, Tveit KM, et al. Meat, vegetables and genetic polymorphisms and the risk of colorectal carcinomas and adenomas. *BMC Cancer*. 2007; **7**: 228.
53. Martinez C, Martin F, Fernandez JM, Garcia-Martin E, Sastre J, Diaz-Rubio M, et al. Glutathione S-transferases mu 1, theta 1, pi 1, alpha 1 and mu 3 genetic polymorphisms and the risk of colorectal and gastric cancers in humans. *Pharmacogenomics*. 2006; **7**(5): 711-8.
54. Huang K, Sandler RS, Millikan RC, Schroeder JC, North KE, Hu J. GSTM1 and GSTT1 polymorphisms, cigarette smoking, and risk of colon cancer: a population-based case-control study in North Carolina (United States). *Cancer Causes Control*. 2006; **17**(4): 385-94.
55. Tijhuis MJ, Wark PA, Aarts JM, Visker MH, Nagengast FM, Kok FJ, et al. GSTP1 and GSTA1 polymorphisms interact with cruciferous vegetable intake in colorectal adenoma risk. *Cancer Epidemiol Biomarkers Prev*. 2005; **14**(12): 2943-51.

56. Ates NA, Tamer L, Ates C, Ercan B, Elipek T, Ocal K, et al. Glutathione S-transferase M1, T1, P1 genotypes and risk for development of colorectal cancer. *Biochem Genet.* 2005; **43**(3-4): 149-63.
57. Kiss I, Nemeth A, Bogner B, Pajkos G, Orsos Z, Sandor J, et al. Polymorphisms of glutathione-S-transferase and arylamine N-acetyltransferase enzymes and susceptibility to colorectal cancer. *Anticancer Res.* 2004; **24**(6): 3965-70.
58. van der Hel OL, Bueno de Mesquita HB, Roest M, Slothouber B, van Gils C, van Noord PA, et al. No modifying effect of NAT1, GSTM1, and GSTT1 on the relation between smoking and colorectal cancer risk. *Cancer Epidemiol Biomarkers Prev.* 2003; **12**(7): 681-2.
59. Smits KM, Gaspari L, Weijenberg MP, Dolzan V, Golka K, Roemer HC, et al. Interaction between smoking, GSTM1 deletion and colorectal cancer: results from the GSEC study. *Biomarkers.* 2003; **8**(3-4): 299-310.
60. Nascimento H, Coy CS, Teori MT, Boin IF, Goes JR, Costa FF, et al. Possible influence of glutathione S-transferase GSTT1 null genotype on age of onset of sporadic colorectal adenocarcinoma. *Dis Colon Rectum.* 2003; **46**(4): 510-5.
61. Ye Z, Parry JM. Genetic polymorphisms in the cytochrome P450 1A1, glutathione S-transferase M1 and T1, and susceptibility to colon cancer. *Teratogenesis, carcinogenesis, and mutagenesis.* 2002; **22**(5): 385-92.
62. Tiemersma EW, Kampman E, Bueno de Mesquita HB, Bunschoten A, van Schothorst EM, Kok FJ, et al. Meat consumption, cigarette smoking, and genetic susceptibility in the etiology of colorectal cancer: results from a Dutch prospective study. *Cancer Causes Control.* 2002; **13**(4): 383-93.
63. Sgambato A, Campisi B, Zupa A, Boichicchio A, Romano G, Tartarone A, et al. Glutathione S-transferase (GST) polymorphisms as risk factors for cancer in a highly homogeneous population from southern Italy. *Anticancer Res.* 2002; **22**(6B): 3647-52.
64. Seow A, Yuan JM, Sun CL, Van Den Berg D, Lee HP, Yu MC. Dietary isothiocyanates, glutathione S-transferase polymorphisms and colorectal cancer risk in the Singapore Chinese Health Study. *Carcinogenesis.* 2002; **23**(12): 2055-61.
65. Laso N, Lafuente MJ, Mas S, Trias M, Ascaso C, Molina R, et al. Glutathione S-transferase (GSTM1 and GSTT1)-dependent risk for colorectal cancer. *Anticancer Res.* 2002; **22**(6A): 3399-403.
66. Saadat I, Saadat M. Glutathione S-transferase M1 and T1 null genotypes and the risk of gastric and colorectal cancers. *Cancer Lett.* 2001; **169**(1): 21-6.
67. Loktionov A, Watson MA, Gunter M, Stebbings WS, Speakman CT, Bingham SA. Glutathione-S-transferase gene polymorphisms in colorectal cancer patients: interaction between GSTM1 and GSTM3 allele variants as a risk-modulating factor. *Carcinogenesis.* 2001; **22**(7): 1053-60.
68. Butler WJ, Ryan P, Roberts-Thomson IC. Metabolic genotypes and risk for colorectal cancer. *J Gastroenterol Hepatol.* 2001; **16**(6): 631-5.
69. Zhang H, Ahmadi A, Arbman G, Zdolsek J, Carstensen J, Nordenskjold B, et al. Glutathione S-transferase T1 and M1 genotypes in normal mucosa, transitional mucosa and colorectal adenocarcinoma. *Int J Cancer.* 1999; **84**(2): 135-8.
70. Welfare M, Monesola Adeokun A, Bassendine MF, Daly AK. Polymorphisms in GSTP1, GSTM1, and GSTT1 and susceptibility to colorectal cancer. *Cancer Epidemiol Biomarkers Prev.* 1999; **8**(4 Pt 1): 289-92.
71. Kampman E, Slattery ML, Bigler J, Leppert M, Samowitz W, Caan BJ, et al. Meat consumption, genetic susceptibility, and colon cancer risk: a United States multicenter case-control study. *Cancer Epidemiol Biomarkers Prev.* 1999; **8**(1): 15-24.
72. Gawronska-Szklarz B, Lubinski J, Kladny J, Kurzawski G, Bielicki D, Wojcicki M, et al. Polymorphism of GSTM1 gene in patients with colorectal cancer and colonic polyps. *Experimental and toxicologic pathology : official journal of the Gesellschaft fur Toxikologische Pathologie.* 1999; **51**(4-5): 321-5.
73. Abdel-Rahman SZ, Soliman AS, Bondy ML, Wu X, El-Badawy SA, Mahgoub KG, et al. Polymorphism of glutathione S-transferase loci GSTM1 and GSTT1 and susceptibility to colorectal cancer in Egypt. *Cancer Lett.* 1999; **142**(1): 97-104.

74. Lee E, Huang Y, Zhao B, Seow-Choen F, Balakrishnan A, Chan SH. Genetic polymorphism of conjugating enzymes and cancer risk: GSTM1, GSTT1, NAT1 and NAT2. *The Journal of toxicological sciences*. 1998; **23 Suppl 2**: 140-2.
75. Gertig DM, Stampfer M, Haiman C, Hennekens CH, Kelsey K, Hunter DJ. Glutathione S-transferase GSTM1 and GSTT1 polymorphisms and colorectal cancer risk: a prospective study. *Cancer Epidemiol Biomarkers Prev*. 1998; **7**(11): 1001-5.
76. Katoh T, Nagata N, Kuroda Y, Itoh H, Kawahara A, Kuroki N, et al. Glutathione S-transferase M1 (GSTM1) and T1 (GSTT1) genetic polymorphism and susceptibility to gastric and colorectal adenocarcinoma. *Carcinogenesis*. 1996; **17**(9): 1855-9.
77. Guo JY, Wan DS, Zeng RP, Zhang Q. The polymorphism of GSTM1, mutagen sensitivity in colon cancer and healthy control. *Mutat Res*. 1996; **372**(1): 17-22.
78. Deakin M, Elder J, Hendrickse C, Peckham D, Baldwin D, Pantin C, et al. Glutathione S-transferase GSTT1 genotypes and susceptibility to cancer: studies of interactions with GSTM1 in lung, oral, gastric and colorectal cancers. *Carcinogenesis*. 1996; **17**(4): 881-4.
79. Chenevix-Trench G, Young J, Coggan M, Board P. Glutathione S-transferase M1 and T1 polymorphisms: susceptibility to colon cancer and age of onset. *Carcinogenesis*. 1995; **16**(7): 1655-7.
80. Zhong S, Wyllie AH, Barnes D, Wolf CR, Spurr NK. Relationship between the GSTM1 genetic polymorphism and susceptibility to bladder, breast and colon cancer. *Carcinogenesis*. 1993; **14**(9): 1821-4.
81. Rudolph A, Hein R, Hoffmeister M, Forsti A, Hemminki K, Risch A, et al. Copy number variations of GSTT1 and GSTM1, colorectal cancer risk and possible effect modification of cigarette smoking and menopausal hormone therapy. *Int J Cancer*. 2012; **131**(5): E841-8.
82. Hezova R, Bienertova-Vasku J, Sachlova M, Brezkova V, Vasku A, Svoboda M, et al. Common polymorphisms in GSTM1, GSTT1, GSTP1, GSTA1 and susceptibility to colorectal cancer in the Central European population. *European journal of medical research*. 2012; **17**: 17.
83. Rajagopal R, Deakin M, Fawole AS, Elder JB, Elder J, Smith V, et al. Glutathione S-transferase T1 polymorphisms are associated with outcome in colorectal cancer. *Carcinogenesis*. 2005; **26**(12): 2157-63.
84. Feik E, Baierl A, Hieger B, Fuhrlinger G, Pentz A, Stattner S, et al. Association of IGF1 and IGFBP3 polymorphisms with colorectal polyps and colorectal cancer risk. *Cancer Causes Control*. 2010; **21**(1): 91-7.
85. Pechlivanis S, Wagner K, Chang-Claude J, Hoffmeister M, Brenner H, Forsti A. Polymorphisms in the insulin like growth factor 1 and IGF binding protein 3 genes and risk of colorectal cancer. *Cancer Detect Prev*. 2007; **31**(5): 408-16.
86. Morimoto LM, Newcomb PA, White E, Bigler J, Potter JD. Insulin-like growth factor polymorphisms and colorectal cancer risk. *Cancer Epidemiol Biomarkers Prev*. 2005; **14**(5): 1204-11.
87. Le Marchand L, Kolonel LN, Henderson BE, Wilkens LR. Association of an exon 1 polymorphism in the IGFBP3 gene with circulating IGFBP-3 levels and colorectal cancer risk: the multiethnic cohort study. *Cancer Epidemiol Biomarkers Prev*. 2005; **14**(5): 1319-21.
88. Ollberding NJ, Cheng I, Wilkens LR, Henderson BE, Pollak MN, Kolonel LN, et al. Genetic variants, prediagnostic circulating levels of insulin-like growth factors, insulin, and glucose and the risk of colorectal cancer: the Multiethnic Cohort study. *Cancer Epidemiol Biomarkers Prev*. 2012; **21**(5): 810-20.
89. Ohsawa T, Sahara T, Muramatsu S, Nishimura Y, Yathuoka T, Tanaka Y, et al. Colorectal cancer susceptibility associated with the hMLH1 V384D variant. *Mol Med Report*. 2009; **2**(6): 887-91.
90. Mei Q, Yan HL, Ding FX, Xue G, Huang JJ, Wang YZ, et al. Single-nucleotide polymorphisms of mismatch repair genes in healthy Chinese individuals and sporadic colorectal cancer patients. *Cancer Genet Cytogenet*. 2006; **171**(1): 17-23.
91. Kim JC, Roh SA, Koo KH, Ka IH, Kim HC, Yu CS, et al. Genotyping possible polymorphic variants of human mismatch repair genes in healthy Korean individuals and sporadic colorectal cancer patients. *Fam Cancer*. 2004; **3**(2): 129-37.
92. Whiffin N, Broderick P, Lubbe SJ, Pittman AM, Penegar S, Chandler I, et al. MLH1-93G > A is a risk factor for MSI colorectal cancer. *Carcinogenesis*. 2011; **32**(8): 1157-61.

93. Campbell PT, Curtin K, Ulrich CM, Samowitz WS, Bigler J, Velicer CM, et al. Mismatch repair polymorphisms and risk of colon cancer, tumour microsatellite instability and interactions with lifestyle factors. *Gut*. 2009; **58**(5): 661-7.
94. Koessler T, Oestergaard MZ, Song H, Tyrer J, Perkins B, Dunning AM, et al. Common variants in mismatch repair genes and risk of colorectal cancer. *Gut*. 2008; **57**(8): 1097-101.
95. Allan JM, Shorto J, Adlard J, Bury J, Coggins R, George R, et al. MLH1 -93G>A promoter polymorphism and risk of mismatch repair deficient colorectal cancer. *Int J Cancer*. 2008; **123**(10): 2456-9.
96. Raptis S, Mrkonjic M, Green RC, Pethe VV, Monga N, Chan YM, et al. MLH1 -93G>A promoter polymorphism and the risk of microsatellite-unstable colorectal cancer. *J Natl Cancer Inst*. 2007; **99**(6): 463-74.
97. Lipkin SM, Rozek LS, Rennert G, Yang W, Chen PC, Hacia J, et al. The MLH1 D132H variant is associated with susceptibility to sporadic colorectal cancer. *Nat Genet*. 2004; **36**(7): 694-9.
98. Fang WL, Liang WB, He H, Zhu Y, Li SL, Gao LB, et al. Association of matrix metalloproteinases 1, 7, and 9 gene polymorphisms with genetic susceptibility to colorectal carcinoma in a Han Chinese population. *DNA Cell Biol*. 2010; **29**(11): 657-61.
99. Kouhkan F, Motovali-Bashi M, Hojati Z. The influence of interstitial collagenase-1 genotype polymorphism on colorectal cancer risk in Iranian population. *Cancer Invest*. 2008; **26**(8): 836-42.
100. Woo M, Park K, Nam J, Kim JC. Clinical implications of matrix metalloproteinase-1, -3, -7, -9, -12, and plasminogen activator inhibitor-1 gene polymorphisms in colorectal cancer. *J Gastroenterol Hepatol*. 2007; **22**(7): 1064-70.
101. Xu E, Lai M, Lu B, Xing X, Huang Q. No association between the polymorphisms in matrix metalloproteinase-1 and matrix metalloproteinase-3 promoter regions and colorectal cancer in Chinese. *Dis Colon Rectum*. 2006; **49**(9): 1439-44.
102. Elander N, Soderkvist P, Fransen K. Matrix metalloproteinase (MMP) -1, -2, -3 and -9 promoter polymorphisms in colorectal cancer. *Anticancer Res*. 2006; **26**(1B): 791-5.
103. Hinoda Y, Okayama N, Takano N, Fujimura K, Suehiro Y, Hamanaka Y, et al. Association of functional polymorphisms of matrix metalloproteinase (MMP)-1 and MMP-3 genes with colorectal cancer. *Int J Cancer*. 2002; **102**(5): 526-9.
104. Biondi ML, Turri O, Leviti S, Seminati R, Cecchini F, Bernini M, et al. MMP1 and MMP3 polymorphisms in promoter regions and cancer. *Clin Chem*. 2000; **46**(12): 2023-4.
105. Hettiaratchi A, Hawkins NJ, McKenzie G, Ward RL, Hunt JE, Wakefield D, et al. The collagenase-1 (MMP-1) gene promoter polymorphism -1607/2G is associated with favourable prognosis in patients with colorectal cancer. *Br J Cancer*. 2007; **96**(5): 783-92.
106. Berndt SI, Platz EA, Fallin MD, Thuita LW, Hoffman SC, Helzlsouer KJ. Mismatch repair polymorphisms and the risk of colorectal cancer. *Int J Cancer*. 2007; **120**(7): 1548-54.
107. Tulupova E, Kumar R, Hanova M, Slyskova J, Pardini B, Polakova V, et al. Do polymorphisms and haplotypes of mismatch repair genes modulate risk of sporadic colorectal cancer? *Mutat Res*. 2008; **648**(1-2): 40-5.
108. Curtin K, Slattery ML, Ulrich CM, Bigler J, Levin TR, Wolff RK, et al. Genetic polymorphisms in one-carbon metabolism: associations with CpG island methylator phenotype (CIMP) in colon cancer and the modifying effects of diet. *Carcinogenesis*. 2007; **28**(8): 1672-9.
109. Koushik A, Kraft P, Fuchs CS, Hankinson SE, Willett WC, Giovannucci EL, et al. Nonsynonymous polymorphisms in genes in the one-carbon metabolism pathway and associations with colorectal cancer. *Cancer Epidemiol Biomarkers Prev*. 2006; **15**(12): 2408-17.
110. Theodoratou E, Campbell H, Tenesa A, Houlston R, Webb E, Lubbe S, et al. A large-scale meta-analysis to refine colorectal cancer risk estimates associated with MUTYH variants. *Br J Cancer*. 2010; **103**(12): 1875-84.
111. Lubbe SJ, Di Bernardo MC, Chandler IP, Houlston RS. Clinical implications of the colorectal cancer risk associated with MUTYH mutation. *J Clin Oncol*. 2009; **27**(24): 3975-80.
112. Cleary SP, Cotterchio M, Jenkins MA, Kim H, Bristow R, Green R, et al. Germline MutY human homologue mutations and colorectal cancer: a multisite case-control study. *Gastroenterology*. 2009; **136**(4): 1251-60.

113. Avezzu A, Agostini M, Pucciarelli S, Lise M, Urso ED, Mammi I, et al. The role of MYH gene in genetic predisposition to colorectal cancer: another piece of the puzzle. *Cancer Lett.* 2008; **268**(2): 308-13.
114. Schafmayer C, Buch S, Egberts JH, Franke A, Brosch M, El Sharawy A, et al. Genetic investigation of DNA-repair pathway genes PMS2, MLH1, MSH2, MSH6, MUTYH, OGG1 and MTH1 in sporadic colon cancer. *Int J Cancer.* 2007; **121**(3): 555-8.
115. Kury S, Buecher B, Robiou-du-Pont S, Scoul C, Colman H, Lelievre B, et al. The thorough screening of the MUTYH gene in a large French cohort of sporadic colorectal cancers. *Genet Test.* 2007; **11**(4): 373-9.
116. Balaguer F, Castellvi-Bel S, Castells A, Andreu M, Munoz J, Gisbert JP, et al. Identification of MYH mutation carriers in colorectal cancer: a multicenter, case-control, population-based study. *Clin Gastroenterol Hepatol.* 2007; **5**(3): 379-87.
117. Moreno V, Gemignani F, Landi S, Gioia-Patricola L, Chabrier A, Blanco I, et al. Polymorphisms in genes of nucleotide and base excision repair: risk and prognosis of colorectal cancer. *Clin Cancer Res.* 2006; **12**(7 Pt 1): 2101-8.
118. Gorgens H, Kruger S, Kuhlisch E, Pagenstecher C, Hohl R, Schackert HK, et al. Microsatellite stable colorectal cancers in clinically suspected hereditary nonpolyposis colorectal cancer patients without vertical transmission of disease are unlikely to be caused by biallelic germline mutations in MYH. *The Journal of molecular diagnostics : JMD.* 2006; **8**(2): 178-82.
119. Colebatch A, Hitchins M, Williams R, Meagher A, Hawkins NJ, Ward RL. The role of MYH and microsatellite instability in the development of sporadic colorectal cancer. *Br J Cancer.* 2006; **95**(9): 1239-43.
120. Zhou XL, Djureinovic T, Werelius B, Lindmark G, Sun XF, Lindblom A. Germline mutations in the MYH gene in Swedish familial and sporadic colorectal cancer. *Genet Test.* 2005; **9**(2): 147-51.
121. Peterlongo P, Mitra N, Chuai S, Kirchoff T, Palmer C, Huang H, et al. Colorectal cancer risk in individuals with biallelic or monoallelic mutations of MYH. *Int J Cancer.* 2005; **114**(3): 505-7.
122. Wang L, Baudhuin LM, Boardman LA, Steenblock KJ, Petersen GM, Halling KC, et al. MYH mutations in patients with attenuated and classic polyposis and with young-onset colorectal cancer without polyps. *Gastroenterology.* 2004; **127**(1): 9-16.
123. Kambara T, Whitehall VL, Spring KJ, Barker MA, Arnold S, Wynter CV, et al. Role of inherited defects of MYH in the development of sporadic colorectal cancer. *Genes Chromosomes Cancer.* 2004; **40**(1): 1-9.
124. Enholm S, Hienonen T, Suomalainen A, Lipton L, Tomlinson I, Karja V, et al. Proportion and phenotype of MYH-associated colorectal neoplasia in a population-based series of Finnish colorectal cancer patients. *Am J Pathol.* 2003; **163**(3): 827-32.
125. da Silva TD, Felipe AV, de Lima JM, Oshima CT, Forones NM. N-Acetyltransferase 2 genetic polymorphisms and risk of colorectal cancer. *World J Gastroenterol.* 2011; **17**(6): 760-5.
126. Yeh CC, Sung FC, Tang R, Chang-Chieh CR, Hsieh LL. Polymorphisms of cytochrome P450 1A2 and N-acetyltransferase genes, meat consumption, and risk of colorectal cancer. *Dis Colon Rectum.* 2009; **52**(1): 104-11.
127. Nothlings U, Yamamoto JF, Wilkens LR, Murphy SP, Park SY, Henderson BE, et al. Meat and heterocyclic amine intake, smoking, NAT1 and NAT2 polymorphisms, and colorectal cancer risk in the multiethnic cohort study. *Cancer Epidemiol Biomarkers Prev.* 2009; **18**(7): 2098-106.
128. Sorensen M, Autrup H, Olsen A, Tjonneland A, Overvad K, Raaschou-Nielsen O. Prospective study of NAT1 and NAT2 polymorphisms, tobacco smoking and meat consumption and risk of colorectal cancer. *Cancer Lett.* 2008; **266**(2): 186-93.
129. Mahid SS, Colliver DW, Crawford NP, Martini BD, Doll MA, Hein DW, et al. Characterization of N-acetyltransferase 1 and 2 polymorphisms and haplotype analysis for inflammatory bowel disease and sporadic colorectal carcinoma. *BMC Med Genet.* 2007; **8**: 28.
130. Lilla C, Risch A, Verla-Tebit E, Hoffmeister M, Brenner H, Chang-Claude J. SULT1A1 genotype and susceptibility to colorectal cancer. *Int J Cancer.* 2007; **120**(1): 201-6.

131. Huang CC, Chien WP, Wong RH, Cheng YW, Chen MC, Chou MC, et al. NAT2 fast acetylator genotype is associated with an increased risk of colorectal cancer in Taiwan. *Dis Colon Rectum*. 2007; **50**(7): 981-9.
132. Borlak J, Reamon-Buettner SM. N-acetyltransferase 2 (NAT2) gene polymorphisms in colon and lung cancer patients. *BMC Med Genet*. 2006; **7**: 58.
133. He LJ, Yu YM, Qiao F, Liu JS, Sun XF, Jiang LL. Genetic polymorphisms of N-acetyltransferase 2 and colorectal cancer risk. *World J Gastroenterol*. 2005; **11**(27): 4268-71.
134. Chan AT, Tranah GJ, Giovannucci EL, Willett WC, Hunter DJ, Fuchs CS. Prospective study of N-acetyltransferase-2 genotypes, meat intake, smoking and risk of colorectal cancer. *Int J Cancer*. 2005; **115**(4): 648-52.
135. Barrett JH, Smith G, Waxman R, Gooderham N, Lightfoot T, Garner RC, et al. Investigation of interaction between N-acetyltransferase 2 and heterocyclic amines as potential risk factors for colorectal cancer. *Carcinogenesis*. 2003; **24**(2): 275-82.
136. Katoh T, Boissy R, Nagata N, Kitagawa K, Kuroda Y, Itoh H, et al. Inherited polymorphism in the N-acetyltransferase 1 (NAT1) and 2 (NAT2) genes and susceptibility to gastric and colorectal adenocarcinoma. *Int J Cancer*. 2000; **85**(1): 46-9.
137. Agundez JAG, Lozano L, Ladero JM, Sastre J, Cerdan FJ, Diaz-Rubio M, et al. N-acetyltransferase 2 (NAT2) genotype and colorectal carcinoma: risk variability according to tumour site? *Scand J Gastroenterol*. 2000; **35**(10): 1087-91.
138. Lee EJ, Zhao B, Seow-Choen F. Relationship between polymorphism of N-acetyltransferase gene and susceptibility to colorectal carcinoma in a Chinese population. *Pharmacogenetics*. 1998; **8**(6): 513-7.
139. Gil JP, Lechner MC. Increased frequency of wild-type arylamine-N-acetyltransferase allele NAT2\*4 homozygotes in Portuguese patients with colorectal cancer. *Carcinogenesis*. 1998; **19**(1): 37-41.
140. Chen J, Stampfer MJ, Hough HL, Garcia-Closas M, Willett WC, Hennekens CH, et al. A prospective study of N-acetyltransferase genotype, red meat intake, and risk of colorectal cancer. *Cancer Res*. 1998; **58**(15): 3307-11.
141. Welfare MR, Cooper J, Bassendine MF, Daly AK. Relationship between acetylator status, smoking, and diet and colorectal cancer risk in the north-east of England. *Carcinogenesis*. 1997; **18**(7): 1351-4.
142. Hubbard AL, Harrison DJ, Moyes C, Wyllie AH, Cunningham C, Mannion E, et al. N-acetyltransferase 2 genotype in colorectal cancer and selective gene retention in cancers with chromosome 8p deletions. *Gut*. 1997; **41**(2): 229-34.
143. Spurr NK, Gough AC, Chingwundoh FI, Smith CA. Polymorphisms in drug-metabolizing enzymes as modifiers of cancer risk. *Clin Chem*. 1995; **41**(12 Pt 2): 1864-9.
144. Bell DA, Stephens EA, Castranio T, Umbach DM, Watson M, Deakin M, et al. Polyadenylation polymorphism in the acetyltransferase 1 gene (NAT1) increases risk of colorectal cancer. *Cancer Res*. 1995; **55**(16): 3537-42.
145. Shibuta K, Nakashima T, Abe M, Mashimo M, Mori M, Ueo H, et al. Molecular genotyping for N-acetylation polymorphism in Japanese patients with colorectal cancer. *Cancer*. 1994; **74**(12): 3108-12.
146. Oda Y, Tanaka M, Nakanishi I. Relation between the occurrence of K-ras gene point mutations and genotypes of polymorphic N-acetyltransferase in human colorectal carcinomas. *Carcinogenesis*. 1994; **15**(7): 1365-9.
147. Lang NP, Butler MA, Massengill J, Lawson M, Stotts RC, Hauer-Jensen M, et al. Rapid metabolic phenotypes for acetyltransferase and cytochrome P4501A2 and putative exposure to food-borne heterocyclic amines increase the risk for colorectal cancer or polyps. *Cancer Epidemiol Biomarkers Prev*. 1994; **3**(8): 675-82.
148. Rodriguez JW, Kirilin WG, Ferguson RJ, Doll MA, Gray K, Rustan TD, et al. Human acetylator genotype: relationship to colorectal cancer incidence and arylamine N-acetyltransferase expression in colon cytosol. *Arch Toxicol*. 1993; **67**(7): 445-52.

149. Ladero JM, Gonzalez JF, Benitez J, Vargas E, Fernandez MJ, Baki W, et al. Acetylator polymorphism in human colorectal carcinoma. *Cancer Res.* 1991; **51**(8): 2098-100.
150. Freire P, Portela F, Donato MM, Figueiredo P, Ferreira M, Amaro P, et al. CARD15 mutations and colorectal cancer in a South European country. *Int J Colorectal Dis.* 2010; **25**(10): 1211-9.
151. Mockelmann N, von Schonfels W, Buch S, von Kampen O, Sipos B, Egberts JH, et al. Investigation of innate immunity genes CARD4, CARD8 and CARD15 as germline susceptibility factors for colorectal cancer. *BMC Gastroenterol.* 2009; **9**: 79.
152. Szeliga J, Sondka Z, Jackowski M, Jarkiewicz-Tretyn J, Tretyn A, Malenczyk M. NOD2/CARD15 polymorphism in patients with rectal cancer. *Med Sci Monit.* 2008; **14**(9): CR480-4.
153. Suchy J, Klujso-Grabowska E, Kladny J, Cybulski C, Wokolorczyk D, Szymanska-Pasternak J, et al. Inflammatory response gene polymorphisms and their relationship with colorectal cancer risk. *BMC Cancer.* 2008; **8**: 112.
154. Vogel U, Christensen J, Dybdahl M, Friis S, Hansen RD, Wallin H, et al. Prospective study of interaction between alcohol, NSAID use and polymorphisms in genes involved in the inflammatory response in relation to risk of colorectal cancer. *Mutat Res.* 2007; **624**(1-2): 88-100.
155. Tuupanen S, Alhopuro P, Mecklin JP, Jarvinen H, Aaltonen LA. No evidence for association of NOD2 R702W and G908R with colorectal cancer. *Int J Cancer.* 2007; **121**(1): 76-9.
156. Lakatos PL, Hitre E, Szalay F, Zinober K, Fuszek P, Lakatos L, et al. Common NOD2/CARD15 variants are not associated with susceptibility or the clinicopathologic characteristics of sporadic colorectal cancer in Hungarian patients. *BMC Cancer.* 2007; **7**: 54.
157. Roberts RL, Gearry RB, Allington MD, Morrin HR, Robinson BA, Frizelle FA. Caspase recruitment domain-containing protein 15 mutations in patients with colorectal cancer. *Cancer Res.* 2006; **66**(5): 2532-5.
158. Papaconstantinou I, Theodoropoulos G, Gazouli M, Panoussopoulos D, Mantzaris GJ, Felekouras E, et al. Association between mutations in the CARD15/NOD2 gene and colorectal cancer in a Greek population. *Int J Cancer.* 2005; **114**(3): 433-5.
159. Lubinski J, Huzarski T, Kurzawski G, Suchy J, Masojc B, Mierzejewski M, et al. The 3020insC Allele of NOD2 Predisposes to Cancers of Multiple Organs. *Hered Cancer Clin Pract.* 2005; **3**(2): 59-63.
160. Kurzawski G, Suchy J, Kladny J, Grabowska E, Mierzejewski M, Jakubowska A, et al. The NOD2 3020insC mutation and the risk of colorectal cancer. *Cancer Res.* 2004; **64**(5): 1604-6.
161. Hoeft B, Linseisen J, Beckmann L, Muller-Decker K, Canzian F, Husing A, et al. Polymorphisms in fatty-acid-metabolism-related genes are associated with colorectal cancer risk. *Carcinogenesis.* 2010; **31**(3): 466-72.
162. Frank B, Hoffmeister M, Klopp N, Illig T, Chang-Claude J, Brenner H. Polymorphisms in inflammatory pathway genes and their association with colorectal cancer risk. *Int J Cancer.* 2010; **127**(12): 2822-30.
163. Pereira C, Pimentel-Nunes P, Brandao C, Moreira-Dias L, Medeiros R, Dinis-Ribeiro M. COX-2 polymorphisms and colorectal cancer risk: a strategy for chemoprevention. *Eur J Gastroenterol Hepatol.* 2010; **22**(5): 607-13.
164. Thompson CL, Plummer SJ, Merkulova A, Cheng I, Tucker TC, Casey G, et al. No association between cyclooxygenase-2 and uridine diphosphate glucuronosyltransferase 1A6 genetic polymorphisms and colon cancer risk. *World J Gastroenterol.* 2009; **15**(18): 2240-4.
165. Hoff JH, te Morsche RH, Roelofs HM, van der Logt EM, Nagengast FM, Peters WH. COX-2 polymorphisms -765G-->C and -1195A-->G and colorectal cancer risk. *World J Gastroenterol.* 2009; **15**(36): 4561-5.
166. Andersen V, Ostergaard M, Christensen J, Overvad K, Tjonneland A, Vogel U. Polymorphisms in the xenobiotic transporter Multidrug Resistance 1 (MDR1) and interaction with meat intake in relation to risk of colorectal cancer in a Danish prospective case-cohort study. *BMC Cancer.* 2009; **9**: 407.
167. Tan W, Wu J, Zhang X, Guo Y, Liu J, Sun T, et al. Associations of functional polymorphisms in cyclooxygenase-2 and platelet 12-lipoxygenase with risk of occurrence and advanced disease status of colorectal cancer. *Carcinogenesis.* 2007; **28**(6): 1197-201.



168. Siezen CL, Bueno-de-Mesquita HB, Peeters PH, Kram NR, van Doeselaar M, van Kranen HJ. Polymorphisms in the genes involved in the arachidonic acid-pathway, fish consumption and the risk of colorectal cancer. *Int J Cancer*. 2006; **119**(2): 297-303.
169. Lin M, Eng C, Hawk ET, Huang M, Greisinger AJ, Gu J, et al. Genetic variants within ultraconserved elements and susceptibility to right- and left-sided colorectal adenocarcinoma. *Carcinogenesis*. 2012; **33**(4): 841-7.
170. Kinnersley B, Migliorini G, Broderick P, Whiffin N, Dobbins SE, Casey G, et al. The TERT variant rs2736100 is associated with colorectal cancer risk. *Br J Cancer*. 2012; **107**(6): 1001-8.
171. Hofer P, Baierl A, Bernhart K, Leeb G, Mach K, Micksche M, et al. Association of genetic variants of human telomerase with colorectal polyps and colorectal cancer risk. *Mol Carcinog*. 2012; **51 Suppl 1**: E176-82.
172. Slattery ML, Herrick JS, Lundgreen A, Wolff RK. Genetic variation in the TGF-beta signaling pathway and colon and rectal cancer risk. *Cancer Epidemiol Biomarkers Prev*. 2011; **20**(1): 57-69.
173. Qi P, Ruan CP, Wang H, Zhou FG, Zhao YP, Gu X, et al. -509C>T polymorphism in the TGF-beta1 gene promoter is not associated with susceptibility to and progression of colorectal cancer in Chinese. *Colorectal Dis*. 2010; **12**(11): 1153-8.
174. Zhang Y, Liu B, Jin M, Ni Q, Liang X, Ma X, et al. Genetic polymorphisms of transforming growth factor-beta1 and its receptors and colorectal cancer susceptibility: a population-based case-control study in China. *Cancer Lett*. 2009; **275**(1): 102-8.
175. Wu GY, Hasenberg T, Magdeburg R, Bonninghoff R, Sturm JW, Keese M. Association between EGF, TGF-beta1, VEGF gene polymorphism and colorectal cancer. *World J Surg*. 2009; **33**(1): 124-9.
176. Amirghofran Z, Jalali SA, Ghaderi A, Hosseini SV. Genetic polymorphism in the transforming growth factor beta1 gene (-509 C/T and -800 G/A) and colorectal cancer. *Cancer Genet Cytogenet*. 2009; **190**(1): 21-5.
177. Saltzman BS, Yamamoto JF, Decker R, Yokochi L, Theriault AG, Vogt TM, et al. Association of genetic variation in the transforming growth factor beta-1 gene with serum levels and risk of colorectal neoplasia. *Cancer Res*. 2008; **68**(4): 1236-44.
178. Chung SJ, Kim JS, Jung HC, Song IS. Transforming growth factor-[beta]1 -509T reduces risk of colorectal cancer, but not adenoma in Koreans. *Cancer Sci*. 2007; **98**(3): 401-4.
179. Crivello A, Giacalone A, Vaglica M, Scola L, Forte GI, Macaluso MC, et al. Regulatory cytokine gene polymorphisms and risk of colorectal carcinoma. *Ann N Y Acad Sci*. 2006; **1089**: 98-103.
180. Macarthur M, Sharp L, Hold GL, Little J, El-Omar EM. The role of cytokine gene polymorphisms in colorectal cancer and their interaction with aspirin use in the northeast of Scotland. *Cancer Epidemiol Biomarkers Prev*. 2005; **14**(7): 1613-8.
181. Li M, You Q, Wang X. Association between polymorphism of the tumor necrosis factor alpha-308 gene promoter and colon cancer in the Chinese population. *Genet Test Mol Biomarkers*. 2011; **15**(11): 743-7.
182. Tsilidis KK, Helzlsouer KJ, Smith MW, Grinberg V, Hoffman-Bolton J, Clipp SL, et al. Association of common polymorphisms in IL10, and in other genes related to inflammatory response and obesity with colorectal cancer. *Cancer Causes Control*. 2009; **20**(9): 1739-51.
183. Garrity-Park MM, Loftus EV, Jr., Bryant SC, Sandborn WJ, Smyrk TC. Tumor necrosis factor-alpha polymorphisms in ulcerative colitis-associated colorectal cancer. *Am J Gastroenterol*. 2008; **103**(2): 407-15.
184. Toth EK, Kocsis J, Madaras B, Biro A, Pocsai Z, Fust G, et al. The 8.1 ancestral MHC haplotype is strongly associated with colorectal cancer risk. *Int J Cancer*. 2007; **121**(8): 1744-8.
185. Theodoropoulos G, Papaconstantinou I, Felekouras E, Nikiteas N, Karakitsos P, Panoussopoulos D, et al. Relation between common polymorphisms in genes related to inflammatory response and colorectal cancer. *World J Gastroenterol*. 2006; **12**(31): 5037-43.
186. Gunter MJ, Canzian F, Landi S, Chanock SJ, Sinha R, Rothman N. Inflammation-related gene polymorphisms and colorectal adenoma. *Cancer Epidemiol Biomarkers Prev*. 2006; **15**(6): 1126-31.
187. Landi S, Moreno V, Gioia-Patricola L, Guino E, Navarro M, de Oca J, et al. Association of common polymorphisms in inflammatory genes interleukin (IL)6, IL8, tumor necrosis factor alpha,

- NFKB1, and peroxisome proliferator-activated receptor gamma with colorectal cancer. *Cancer Res.* 2003; **63**(13): 3560-6.
188. Jang WH, Yang YI, Yea SS, Lee YJ, Chun JH, Kim HI, et al. The -238 tumor necrosis factor-alpha promoter polymorphism is associated with decreased susceptibility to cancers. *Cancer Lett.* 2001; **166**(1): 41-6.
189. Lee KE, Hong YS, Kim BG, Kim NY, Lee KM, Kwak JY, et al. p73 G4C14 to A4T14 polymorphism is associated with colorectal cancer risk and survival. *World J Gastroenterol.* 2010; **16**(35): 4448-54.
190. Arfaoui AT, Kriaa LB, El Hadj Oel A, Ben Hmida MA, Khiari M, Khalfallah T, et al. Association of a p73 exon 2 GC/AT polymorphism with colorectal cancer risk and survival in Tunisian patients. *Virchows Archiv : an international journal of pathology.* 2010; **457**(3): 359-68.
191. Pfeifer D, Arbman G, Sun XF. Polymorphism of the p73 gene in relation to colorectal cancer risk and survival. *Carcinogenesis.* 2005; **26**(1): 103-7.
192. Hamajima N, Matsuo K, Suzuki T, Nakamura T, Matsuura A, Hatooka S, et al. No associations of p73 G4C14-to-A4T14 at exon 2 and p53 Arg72Pro polymorphisms with the risk of digestive tract cancers in Japanese. *Cancer Lett.* 2002; **181**(1): 81-5.
193. Slattery ML, Wolff RK, Herrick JS, Caan BJ, Samowitz W. Calcium, vitamin D, VDR genotypes, and epigenetic and genetic changes in rectal tumors. *Nutr Cancer.* 2010; **62**(4): 436-42.
194. Theodoratou E, Farrington SM, Tenesa A, McNeill G, Cetnarskyj R, Barnetson RA, et al. Modification of the inverse association between dietary vitamin D intake and colorectal cancer risk by a FokI variant supports a chemoprotective action of Vitamin D intake mediated through VDR binding. *Int J Cancer.* 2008; **123**(9): 2170-9.
195. Ochs-Balcom HM, Cicek MS, Thompson CL, Tucker TC, Elston RC, S JP, et al. Association of vitamin D receptor gene variants, adiposity and colon cancer. *Carcinogenesis.* 2008; **29**(9): 1788-93.
196. Bentley RW, Keown DA, Gearry RB, Cameron VA, Keenan J, Roberts RL, et al. Vitamin D receptor polymorphisms in colorectal cancer in New Zealand: an association study. *The New Zealand medical journal.* 2012; **125**(1356): 47-51.
197. Mahmoudi T, Karimi K, Mohebbi SR, Fatemi SR, Zali MR. Start codon FokI and intron 8 BsmI variants in the vitamin D receptor gene and susceptibility to colorectal cancer. *Mol Biol Rep.* 2011; **38**(7): 4765-70.
198. Kupfer SS, Anderson JR, Ludvik AE, Hooker S, Skol A, Kittles RA, et al. Genetic associations in the vitamin D receptor and colorectal cancer in African Americans and Caucasians. *PLoS One.* 2011; **6**(10): e26123.
199. Hughes DJ, Hlavata I, Soucek P, Pardini B, Naccarati A, Vodickova L, et al. Variation in the vitamin D receptor gene is not associated with risk of colorectal cancer in the Czech Republic. *J Gastrointest Cancer.* 2011; **42**(3): 149-54.
200. Li C, Li Y, Gao LB, Wang YY, Zhou B, Lv ML, et al. Vitamin D receptor gene polymorphisms and the risk of colorectal cancer in a Chinese population. *Dig Dis Sci.* 2009; **54**(3): 634-9.
201. Jenab M, McKay J, Bueno-de-Mesquita HB, van Duijnhoven FJ, Ferrari P, Slimani N, et al. Vitamin D receptor and calcium sensing receptor polymorphisms and the risk of colorectal cancer in European populations. *Cancer Epidemiol Biomarkers Prev.* 2009; **18**(9): 2485-91.
202. Parisi E, Rene JM, Cardus A, Valcheva P, Pinol-Felis C, Valdivielso JM, et al. Vitamin D receptor levels in colorectal cancer. Possible role of BsmI polymorphism. *J Steroid Biochem Mol Biol.* 2008; **111**(1-2): 87-90.
203. Kadiyska T, Yakulov T, Kaneva R, Nedin D, Alexandrova A, Gegova A, et al. Vitamin D and estrogen receptor gene polymorphisms and the risk of colorectal cancer in Bulgaria. *Int J Colorectal Dis.* 2007; **22**(4): 395-400.
204. Flugge J, Krusekopf S, Goldammer M, Osswald E, Terhalle W, Malzahn U, et al. Vitamin D receptor haplotypes protect against development of colorectal cancer. *Eur J Clin Pharmacol.* 2007; **63**(11): 997-1005.
205. Slattery ML, Sweeney C, Murtaugh M, Ma KN, Caan BJ, Potter JD, et al. Associations between vitamin D, vitamin D receptor gene and the androgen receptor gene with colon and rectal cancer. *Int J Cancer.* 2006; **118**(12): 3140-6.

206. Park K, Woo M, Nam J, Kim JC. Start codon polymorphisms in the vitamin D receptor and colorectal cancer risk. *Cancer Lett.* 2006; **237**(2): 199-206.
207. Speer G, Cseh K, Winkler G, Takacs I, Barna I, Nagy Z, et al. Oestrogen and vitamin D receptor (VDR) genotypes and the expression of ErbB-2 and EGF receptor in human rectal cancers. *Eur J Cancer.* 2001; **37**(12): 1463-8.
208. Ungerback J, Elander N, Dimberg J, Soderkvist P. Analysis of VEGF polymorphisms, tumor expression of VEGF mRNA and colorectal cancer susceptibility in a Swedish population. *Mol Med Report.* 2009; **2**(3): 435-9.
209. Dassoulas K, Gazouli M, Rizos S, Theodoropoulos G, Christoni Z, Nikiteas N, et al. Common polymorphisms in the vascular endothelial growth factor gene and colorectal cancer development, prognosis, and survival. *Mol Carcinog.* 2009; **48**(6): 563-9.
210. Hofmann G, Langsenlehner U, Renner W, Langsenlehner T, Yazdani-Biuki B, Clar H, et al. Common single nucleotide polymorphisms in the vascular endothelial growth factor gene and colorectal cancer risk. *J Cancer Res Clin Oncol.* 2008; **134**(5): 591-5.
211. Chae YS, Kim JG, Sohn SK, Cho YY, Ahn BM, Moon JH, et al. Association of vascular endothelial growth factor gene polymorphisms with susceptibility and clinicopathologic characteristics of colorectal cancer. *Journal of Korean medical science.* 2008; **23**(3): 421-7.
212. Bae SJ, Kim JW, Kang H, Hwang SG, Oh D, Kim NK. Gender-specific association between polymorphism of vascular endothelial growth factor (VEGF 936 C>T) gene and colon cancer in Korea. *Anticancer Res.* 2008; **28**(2B): 1271-6.
213. Gil J, Ramsey D, Stembalska A, Karpinski P, Pesz KA, Laczmanska I, et al. The C/A polymorphism in intron 11 of the XPC gene plays a crucial role in the modulation of an individual's susceptibility to sporadic colorectal cancer. *Mol Biol Rep.* 2012; **39**(1): 527-34.
214. Jelonek K, Gdowicz-Klosok A, Pietrowska M, Borkowska M, Korfanty J, Rzeszowska-Wolny J, et al. Association between single-nucleotide polymorphisms of selected genes involved in the response to DNA damage and risk of colon, head and neck, and breast cancers in a Polish population. *J Appl Genet.* 2010; **51**(3): 343-52.
215. Hansen RD, Sorensen M, Tjonneland A, Overvad K, Wallin H, Raaschou-Nielsen O, et al. XPA A23G, XPC Lys939Gln, XPD Lys751Gln and XPD Asp312Asn polymorphisms, interactions with smoking, alcohol and dietary factors, and risk of colorectal cancer. *Mutat Res.* 2007; **619**(1-2): 68-80.
216. Wu Y, Jin M, Liu B, Liang X, Yu Y, Li Q, et al. The association of XPC polymorphisms and tea drinking with colorectal cancer risk in a Chinese population. *Mol Carcinog.* 2011; **50**(3): 189-98.
217. Engin AB, Karahalil B, Engin A, Karakaya AE. Oxidative stress, Helicobacter pylori, and OGG1 Ser326Cys, XPC Lys939Gln, and XPD Lys751Gln polymorphisms in a Turkish population with colorectal carcinoma. *Genet Test Mol Biomarkers.* 2010; **14**(4): 559-64.
218. Pardini B, Naccarati A, Novotny J, Smerhovsky Z, Vodickova L, Polakova V, et al. DNA repair genetic polymorphisms and risk of colorectal cancer in the Czech Republic. *Mutat Res.* 2008; **638**(1-2): 146-53.
219. Hazra A, Chanock S, Giovannucci E, Cox DG, Niu T, Fuchs C, et al. Large-scale evaluation of genetic variants in candidate genes for colorectal cancer risk in the Nurses' Health Study and the Health Professionals' Follow-up Study. *Cancer Epidemiol Biomarkers Prev.* 2008; **17**(2): 311-9.
220. Liu D, Wu HZ, Zhang YN, Kang H, Sun MJ, Wang EH, et al. DNA repair genes XPC, XPG polymorphisms: relation to the risk of colorectal carcinoma and therapeutic outcome with Oxaliplatin-based adjuvant chemotherapy. *Mol Carcinog.* 2012; **51 Suppl 1**: E83-93.
221. Pittman AM, Twiss P, Broderick P, Lubbe S, Chandler I, Penegar S, et al. The CDH1-160C>A polymorphism is a risk factor for colorectal cancer. *Int J Cancer.* 2009; **125**(7): 1622-5.
222. Tan XL, Nieters A, Kropp S, Hoffmeister M, Brenner H, Chang-Claude J. The association of cyclin D1 G870A and E-cadherin C-160A polymorphisms with the risk of colorectal cancer in a case control study and meta-analysis. *Int J Cancer.* 2008; **122**(11): 2573-80.
223. Grunhage F, Jungck M, Lamberti C, Berg C, Becker U, Schulte-Witte H, et al. Association of familial colorectal cancer with variants in the E-cadherin (CDH1) and cyclin D1 (CCND1) genes. *Int J Colorectal Dis.* 2008; **23**(2): 147-54.

224. Cattaneo F, Venesio T, Molatore S, Russo A, Fiocca R, Frattini M, et al. Functional analysis and case-control study of -160C/A polymorphism in the E-cadherin gene promoter: association with cancer risk. *Anticancer Res.* 2006; **26**(6B): 4627-32.
225. Porter TR, Richards FM, Houlston RS, Evans DG, Jankowski JA, Macdonald F, et al. Contribution of cyclin d1 (CCND1) and E-cadherin (CDH1) polymorphisms to familial and sporadic colorectal cancer. *Oncogene.* 2002; **21**(12): 1928-33.
226. Ikeda S, Sasazuki S, Natsukawa S, Shaura K, Koizumi Y, Kasuga Y, et al. Screening of 214 single nucleotide polymorphisms in 44 candidate cancer susceptibility genes: a case-control study on gastric and colorectal cancers in the Japanese population. *Am J Gastroenterol.* 2008; **103**(6): 1476-87.
227. Otani T, Iwasaki M, Hanaoka T, Kobayashi M, Ishihara J, Natsukawa S, et al. Folate, vitamin B6, vitamin B12, and vitamin B2 intake, genetic polymorphisms of related enzymes, and risk of colorectal cancer in a hospital-based case-control study in Japan. *Nutr Cancer.* 2005; **53**(1): 42-50.
228. Matsuo K, Hamajima N, Hirai T, Kato T, Inoue M, Takezaki T, et al. Methionine Synthase Reductase Gene A66G Polymorphism is Associated with Risk of Colorectal Cancer. *Asian Pac J Cancer Prev.* 2002; **3**(4): 353-9.
229. Andersen V, Christensen J, Overvad K, Tjonneland A, Vogel U. Polymorphisms in NFkB, PXR, LXR and risk of colorectal cancer in a prospective study of Danes. *BMC Cancer.* 2010; **10**: 484.
230. Lewander A, Butchi AK, Gao J, He LJ, Lindblom A, Arman G, et al. Polymorphism in the promoter region of the NFKB1 gene increases the risk of sporadic colorectal cancer in Swedish but not in Chinese populations. *Scand J Gastroenterol.* 2007; **42**(11): 1332-8.
231. Ungerback J, Belenki D, Jawad ul-Hassan A, Fredrikson M, Fransén K, Elander N, et al. Genetic variation and alterations of genes involved in NFkappaB/TNFAIP3- and NLRP3-inflammasome signaling affect susceptibility and outcome of colorectal cancer. *Carcinogenesis.* 2012; **33**(11): 2126-34.
232. Canbay E, Cakmakoglu B, Zeybek U, Sozen S, Cacina C, Gulluoglu M, et al. Association of APE1 and hOGG1 polymorphisms with colorectal cancer risk in a Turkish population. *Curr Med Res Opin.* 2011; **27**(7): 1295-302.
233. Obtulowicz T, Swoboda M, Speina E, Gackowski D, Rozalski R, Siomek A, et al. Oxidative stress and 8-oxoguanine repair are enhanced in colon adenoma and carcinoma patients. *Mutagenesis.* 2010; **25**(5): 463-71.
234. Brevik A, Joshi AD, Corral R, Onland-Moret NC, Siegmund KD, Le Marchand L, et al. Polymorphisms in base excision repair genes as colorectal cancer risk factors and modifiers of the effect of diets high in red meat. *Cancer Epidemiol Biomarkers Prev.* 2010; **19**(12): 3167-73.
235. Sliwinski T, Krupa R, Wisniewska-Jarosinska M, Pawlowska E, Lech J, Chojnacki J, et al. Common polymorphisms in the XPD and hOGG1 genes are not associated with the risk of colorectal cancer in a Polish population. *Tohoku J Exp Med.* 2009; **218**(3): 185-91.
236. Hansen RD, Krath BN, Frederiksen K, Tjonneland A, Overvad K, Roswall N, et al. GPX1 Pro(198)Leu polymorphism, erythrocyte GPX activity, interaction with alcohol consumption and smoking, and risk of colorectal cancer. *Mutat Res.* 2009; **664**(1-2): 13-9.
237. Curtin K, Samowitz WS, Wolff RK, Ulrich CM, Caan BJ, Potter JD, et al. Assessing tumor mutations to gain insight into base excision repair sequence polymorphisms and smoking in colon cancer. *Cancer Epidemiol Biomarkers Prev.* 2009; **18**(12): 3384-8.
238. Hansen R, Saebo M, Skjelbred CF, Nexø BA, Hagen PC, Bock G, et al. GPX Pro198Leu and OGG1 Ser326Cys polymorphisms and risk of development of colorectal adenomas and colorectal cancer. *Cancer Lett.* 2005; **229**(1): 85-91.
239. Xing LL, Wang ZN, Jiang L, Zhang Y, Xu YY, Li J, et al. Cyclooxygenase 2 polymorphism and colorectal cancer: -765G>C variant modifies risk associated with smoking and body mass index. *World J Gastroenterol.* 2008; **14**(11): 1785-9.
240. Hamajima N, Takezaki T, Matsuo K, Saito T, Inoue M, Hirai T, et al. Genotype Frequencies of Cyclooxygenase 2 (COX2) Rare Polymorphisms for Japanese with and without Colorectal Cancer. *Asian Pac J Cancer Prev.* 2001; **2**(1): 57-62.

241. Tijhuis MJ, Visker MH, Aarts JM, Laan W, de Boer SY, Kok FJ, et al. NQO1 and NFE2L2 polymorphisms, fruit and vegetable intake and smoking and the risk of colorectal adenomas in an endoscopy-based population. *Int J Cancer*. 2008; **122**(8): 1842-8.
242. van der Logt EM, Bergevoet SM, Roelofs HM, Te Morsche RH, Dijk Y, Wobbes T, et al. Role of epoxide hydrolase, NAD(P)H:quinone oxidoreductase, cytochrome P450 2E1 or alcohol dehydrogenase genotypes in susceptibility to colorectal cancer. *Mutat Res*. 2006; **593**(1-2): 39-49.
243. Begleiter A, Hewitt D, Maksymiuk AW, Ross DA, Bird RP. A NAD(P)H:quinone oxidoreductase 1 polymorphism is a risk factor for human colon cancer. *Cancer Epidemiol Biomarkers Prev*. 2006; **15**(12): 2422-6.
244. Harth V, Donat S, Ko Y, Abel J, Vetter H, Bruning T. NAD(P)H quinone oxidoreductase 1 codon 609 polymorphism and its association to colorectal cancer. *Arch Toxicol*. 2000; **73**(10-11): 528-31.
245. Slattery ML, Folsom AR, Wolff R, Herrick J, Caan BJ, Potter JD. Transcription factor 7-like 2 polymorphism and colon cancer. *Cancer Epidemiol Biomarkers Prev*. 2008; **17**(4): 978-82.
246. Folsom AR, Pankow JS, Peacock JM, Bielinski SJ, Heiss G, Boerwinkle E. Variation in TCF7L2 and increased risk of colon cancer: the Atherosclerosis Risk in Communities (ARIC) Study. *Diabetes Care*. 2008; **31**(5): 905-9.
247. Zhang Y, Liu L, Tang Y, Chen C, Wang Q, Xu J, et al. Polymorphisms in TP53 and MDM2 contribute to higher risk of colorectal cancer in Chinese population: a hospital-based, case-control study. *Mol Biol Rep*. 2012; **39**(10): 9661-8.
248. Gao LB, Li LJ, Pan XM, Li ZH, Liang WB, Bai P, et al. A genetic variant in the promoter region of miR-34b/c is associated with a reduced risk of colorectal cancer. *Biol Chem*. 2012.
249. Song HR, Kweon SS, Kim HN, Piao JM, Yun WJ, Choi JS, et al. p53 codon 72 polymorphism in patients with gastric and colorectal cancer in a Korean population. *Gastric Cancer*. 2011; **14**(3): 242-8.
250. Joshi AM, Budhathoki S, Ohnaka K, Mibu R, Tanaka M, Kakeji Y, et al. TP53 R72P and MDM2 SNP309 polymorphisms and colorectal cancer risk: the Fukuoka Colorectal Cancer Study. *Jpn J Clin Oncol*. 2011; **41**(2): 232-8.
251. Zhu ZZ, Wang AZ, Jia HR, Jin XX, He XL, Hou LF, et al. Association of the TP53 codon 72 polymorphism with colorectal cancer in a Chinese population. *Jpn J Clin Oncol*. 2007; **37**(5): 385-90.
252. Murata M, Tagawa M, Kimura M, Kimura H, Watanabe S, Saisho H. Analysis of a germ line polymorphism of the p53 gene in lung cancer patients; discrete results with smoking history. *Carcinogenesis*. 1996; **17**(2): 261-4.
253. Kawajiri K, Nakachi K, Imai K, Watanabe J, Hayashi S. Germ line polymorphisms of p53 and CYP1A1 genes involved in human lung cancer. *Carcinogenesis*. 1993; **14**(6): 1085-9.

## References for previous meta-analyses

1. Gu D, Wang M, Wang M, Zhang Z, Chen J. The DNA repair gene APE1 T1349G polymorphism and cancer risk: a meta-analysis of 27 case-control studies. *Mutagenesis* 2009;24(6):507-12.
2. Pabalan N, Bapat B, Sung L, et al. Cyclin D1 Pro241Pro (CCND1-G870A) polymorphism is associated with increased cancer risk in human populations: a meta-analysis. *Cancer Epidemiol Biomarkers Prev* 2008;17(10):2773-81.
3. Wang Y, Yang H, Li L, et al. E-cadherin (CDH1) gene promoter polymorphism and the risk of colorectal cancer : a meta-analysis. *Int J Colorectal Dis* 2012;27(2):151-8.
4. Jin JQ, Hu YY, Niu YM, et al. CYP1A1 Ile462Val polymorphism contributes to colorectal cancer risk: a meta-analysis. *World J Gastroenterol* 2011;17(2):260-6.
5. Zheng Y, Wang JJ, Sun L, Li HL. Association between CYP1A1 polymorphism and colorectal cancer risk: a meta-analysis. *Mol Biol Rep* 2012;39(4):3533-40.
6. Zhang Y, Ding D, Wang X, et al. Lack of association between XPD Lys751Gln and Asp312Asn polymorphisms and colorectal cancer risk: a meta-analysis of case-control studies. *Int J Colorectal Dis* 2011;26(10):1257-64.
7. Ye Z, Parry JM. A meta-analysis of 20 case-control studies of the glutathione S-transferase M1 (GSTM1) status and colorectal cancer risk. *Med Sci Monit* 2003;9(10):SR83-SR91.
8. Gao Y, Cao Y, Tan A, et al. Glutathione S-transferase M1 polymorphism and sporadic colorectal cancer risk: An updating meta-analysis and HuGE review of 36 case-control studies. *Ann Epidemiol* 2010;20(2):108-21.
9. Economopoulos KP, Sergentanis TN. GSTM1, GSTT1, GSTP1, GSTA1 and colorectal cancer risk: a comprehensive meta-analysis. *Eur J Cancer* 2010;46(9):1617-31.
10. Gao Y, Pan X, Su T, et al. Glutathione S-transferase P1 Ile105Val polymorphism and colorectal cancer risk: a meta-analysis and HuGE review. *Eur J Cancer* 2009;45(18):3303-14.
11. Liao C, Cao Y, Wu L, Huang J, Gao F. An updating meta-analysis of the glutathione S-transferase T1 polymorphisms and colorectal cancer risk: a HuGE review. *Int J Colorectal Dis* 2010;25(1):25-37.
12. Wan H, Zhou Y, Yang P, et al. Genetic polymorphism of glutathione S-transferase T1 and the risk of colorectal cancer: a meta-analysis. *Cancer Epidemiol* 2010;34(1):66-72.
13. Zhong S, Yang JH, Liu K, Jiao BH, Chang Z. Null genotype of glutathione S-transferase T1 contributes to colorectal cancer risk in the Asian population: a meta-analysis. *J Gastroenterol Hepatol* 2012;27(2):231-7.
14. Chen X, Guan J, Song Y, et al. IGF-I (CA) repeat polymorphisms and risk of cancer: a meta-analysis. *J Hum Genet* 2008;53(3):227-38.
15. Fang F, Yu XJ, Yu L, Yao L. MDM2 309 T/G polymorphism is associated with colorectal cancer risk especially in Asians: a meta-analysis. *Med Oncol* 2011;28(4):981-5.
16. Zhong Y, Huang Y, Huang Y, et al. Effects of O6-methylguanine-DNA methyltransferase (MGMT) polymorphisms on cancer: a meta-analysis. *Mutagenesis* 2010;25(1):83-95.
17. McColgan P, Sharma P. Polymorphisms of matrix metalloproteinases 1, 2, 3 and 9 and susceptibility to lung, breast and colorectal cancer in over 30,000 subjects. *Int J Cancer* 2009;125(6):1473-8.
18. Liu D, Duan W, Guo H, Xu X, Bai Y. Meta-analysis of associations between polymorphisms in the promoter regions of matrix metalloproteinases and the risk of colorectal cancer. *Int J Colorectal Dis* 2011;26(9):1099-105.
19. Hubner RA, Houlston RS. MTHFR C677T and colorectal cancer risk: A meta-analysis of 25 populations. *Int J Cancer* 2007;120(5):1027-35.
20. Huang Y, Han S, Li Y, Mao Y, Xie Y. Different roles of MTHFR C677T and A1298C polymorphisms in colorectal adenoma and colorectal cancer: a meta-analysis. *J Hum Genet* 2007;52(1):73-85.

21. Taioli E, Garza MA, Ahn YO, et al. Meta- and pooled analyses of the methylenetetrahydrofolate reductase (MTHFR) C677T polymorphism and colorectal cancer: a HuGE-GSEC review. *Am J Epidemiol* 2009;170(10):1207-21.
22. Zacho J, Yazdanyar S, Bojesen SE, Tybjaerg-Hansen A, Nordestgaard BG. Hyperhomocysteinemia, methylenetetrahydrofolate reductase c.677C>T polymorphism and risk of cancer: cross-sectional and prospective studies and meta-analyses of 75,000 cases and 93,000 controls. *Int J Cancer* 2011;128(3):644-52.
23. Yu K, Zhang J, Zhang J, et al. Methionine synthase A2756G polymorphism and cancer risk: a meta-analysis. *Eur J Hum Genet* 2010;18(3):370-8.
24. Han D, Shen C, Meng X, et al. Methionine synthase reductase A66G polymorphism contributes to tumor susceptibility: evidence from 35 case-control studies. *Mol Biol Rep* 2012;39(2):805-16.
25. Theodoratou E, Campbell H, Tenesa A, et al. A large-scale meta-analysis to refine colorectal cancer risk estimates associated with MUTYH variants. *Br J Cancer* 2010;103(12):1875-84.
26. Tian Y, Li Y, Hu Z, et al. Differential effects of NOD2 polymorphisms on colorectal cancer risk: a meta-analysis. *Int J Colorectal Dis* 2010;25(2):161-8.
27. Zhang Y, He BS, Pan YQ, Xu YQ, Wang SK. Association of OGG1 Ser326Cys polymorphism with colorectal cancer risk: a meta-analysis. *Int J Colorectal Dis* 2011;26(12):1525-30.
28. Lu YL, Li GL, Huang HL, Zhong J, Dai LC. Peroxisome proliferator-activated receptor-gamma 34C>G polymorphism and colorectal cancer risk: a meta-analysis. *World J Gastroenterol* 2010;16(17):2170-5.
29. Xu W, Li Y, Wang X, et al. PPARgamma polymorphisms and cancer risk: a meta-analysis involving 32,138 subjects. *Oncol Rep* 2010;24(2):579-85.
30. Zhu W, Wei BB, Shan X, Liu P. -765G>C and 8473T>C polymorphisms of COX-2 and cancer risk: a meta-analysis based on 33 case-control studies. *Mol Biol Rep* 2010;37(1):277-88.
31. Cao H, Xu Z, Long H, Li XQ, Li SL. The -765C allele of the cyclooxygenase-2 gene as a potential risk factor of colorectal cancer: a meta-analysis. *Tohoku J Exp Med* 2010;222(1):15-21.
32. Zhang C, Li JP, Lv GQ, et al. Lack of association of SULT1A1 R213H polymorphism with colorectal cancer: a meta-analysis. *PLoS One* 2011;6(6):e19127.
33. Fang F, Yu L, Zhong Y, Yao L. TGFBI 509 C/T polymorphism and colorectal cancer risk: a meta-analysis. *Med Oncol* 2010;27(4):1324-8.
34. Kaklamani VG, Hou N, Bian Y, et al. TGFBR1\*6A and cancer risk: a meta-analysis of seven case-control studies. *J Clin Oncol* 2003;21(17):3236-43.
35. Liao RY, Mao C, Qiu LX, et al. TGFBR1\*6A/9A polymorphism and cancer risk: a meta-analysis of 13,662 cases and 14,147 controls. *Mol Biol Rep* 2010;37(7):3227-32.
36. Fan W, Maoqing W, Wangyang C, et al. Relationship between the polymorphism of tumor necrosis factor-alpha-308 G>A and susceptibility to inflammatory bowel diseases and colorectal cancer: a meta-analysis. *Eur J Hum Genet* 2011;19(4):432-7.
37. Dahabreh IJ, Linardou H, Bouzika P, Varvarigou V, Murray S. TP53 Arg72Pro polymorphism and colorectal cancer risk: a systematic review and meta-analysis. *Cancer Epidemiol Biomarkers Prev* 2010;19(7):1840-7.
38. Tang NP, Wu YM, Wang B, Ma J. Systematic review and meta-analysis of the association between P53 codon 72 polymorphism and colorectal cancer. *Eur J Surg Oncol* 2010;36(5):431-8.
39. Economopoulos KP, Sergeantanis TN, Zagouri F, Zografos GC. Association between p53 Arg72Pro polymorphism and colorectal cancer risk: a meta-analysis. *Onkologie* 2010;33(12):666-74.
40. Wang JJ, Zheng Y, Sun L, et al. TP53 codon 72 polymorphism and colorectal cancer susceptibility: a meta-analysis. *Mol Biol Rep* 2011;38(8):4847-53.
41. Liu F, Liu L, Li B, et al. p73 G4C14-A4T14 polymorphism and cancer risk: a meta-analysis based on 27 case-control studies. *Mutagenesis* 2011;26(4):573-81.
42. Yu XJ, Fang F, Xie J. Relationship between TP73 polymorphism (G4C14-A4T14) and cancer risk: a meta-analysis based on literatures. *Gene* 2011;484(1-2):42-6.

43. Hu Y, Jiang L, Zheng J, et al. Association between the p73 exon 2 G4C14-to-A4T14 polymorphism and cancer risk: a meta-analysis. *DNA Cell Biol* 2012;31(2):230-7.
44. Chao C, Zhang ZF, Berthiller J, Boffetta P, Hashibe M. NAD(P)H:quinone oxidoreductase 1 (NQO1) Pro187Ser polymorphism and the risk of lung, bladder, and colorectal cancers: a meta-analysis. *Cancer Epidemiol Biomarkers Prev* 2006;15(5):979-87.
45. Cao C, Ying T, Fang JJ, et al. Polymorphism of vascular endothelial growth factor -2578C/A with cancer risk: evidence from 11263 subjects. *Med Oncol* 2011;28(4):1169-75.
46. Zhou LP, Luan H, Dong XH, et al. Vascular endothelial growth factor gene polymorphisms and colorectal cancer risk: a meta-analysis. *Genet Mol Res* 2011;10(4):3674-88.
47. Liu L, Liu L, Zeng F, et al. Meta-analysis of the association between VEGF-634 G>C and risk of malignancy based on 23 case-control studies. *J Cancer Res Clin Oncol* 2011;137(6):1027-36.
48. Raimondi S, Johansson H, Maisonneuve P, Gandini S. Review and meta-analysis on vitamin D receptor polymorphisms and cancer risk. *Carcinogenesis* 2009;30(7):1170-80.
49. Touvier M, Chan DS, Lau R, et al. Meta-analyses of vitamin D intake, 25-hydroxyvitamin D status, vitamin D receptor polymorphisms, and colorectal cancer risk. *Cancer Epidemiol Biomarkers Prev* 2011;20(5):1003-16.
50. Jiang Z, Li C, Xu Y, Cai S. A meta-analysis on XRCC1 and XRCC3 polymorphisms and colorectal cancer risk. *Int J Colorectal Dis* 2010;25(2):169-80.
51. Wang B, Wang D, Huang G, et al. XRCC1 polymorphisms and risk of colorectal cancer: a meta-analysis. *Int J Colorectal Dis* 2010;25(3):313-21.
52. Jiang Z, Li C, Xu Y, Cai S. A meta-analysis on XRCC1 and XRCC3 polymorphisms and colorectal cancer risk. *Int J Colorectal Dis* 2010;25(2):169-80.
